# Supplementary material for: Synthesis of New 2,3-Dihydroindole Derivatives and Evaluation of Their Melatonin Receptor Binding Affinity
Source: MDPI journal article supplement (doi:10.3390/molecules27217462), 2022-11-02

## **Supplementary Materials**

### **Synthesis of New 2,3-Dihydroindole Derivatives and Evaluation of Its Melatonin Receptor Binding Affinity**

**S1. Binding curves of compounds 7a and 7d to MT2 (A,B) and MT1 (C)**

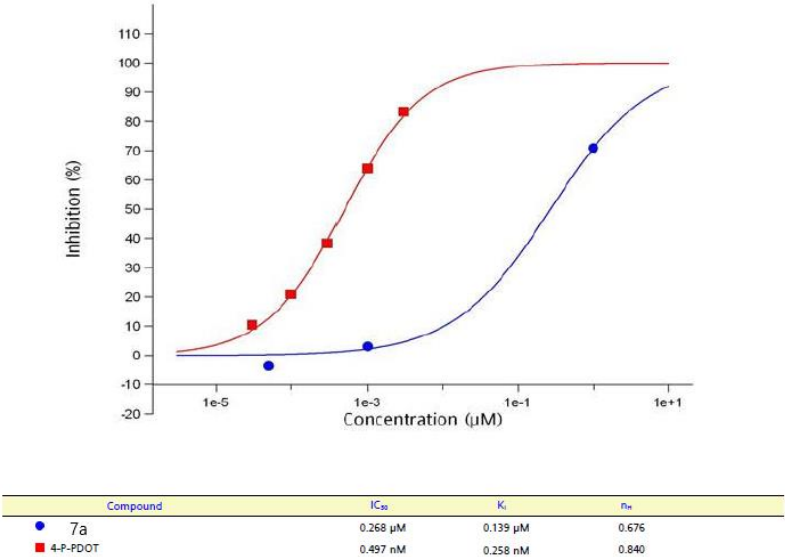

Figure A

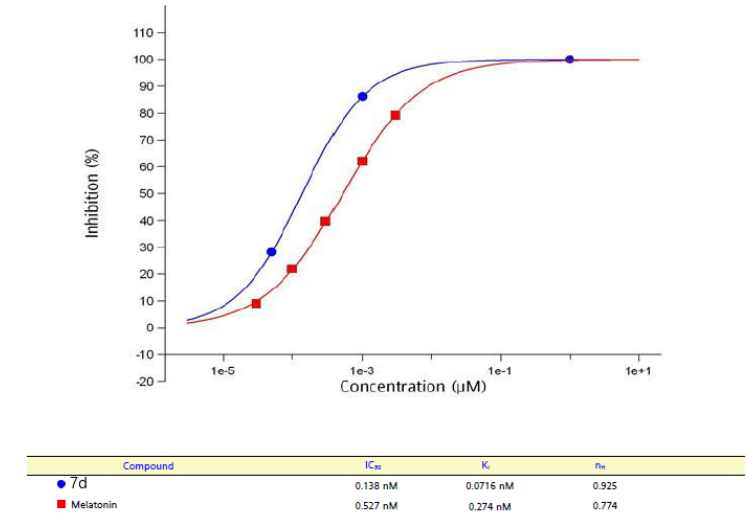

Figure B

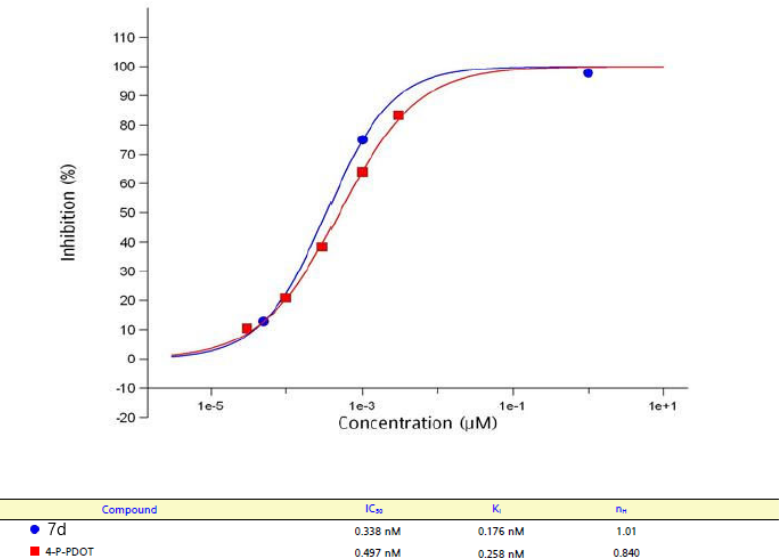

Figure C

## METHODS - RADIOLIGAND BINDING ASSAYS

### ■ 251600 Melatonin MT<sub>1</sub>

|                        |                                                                                    |
|------------------------|------------------------------------------------------------------------------------|
| Source:                | Human recombinant CHO-K1 cells                                                     |
| Ligand:                | 0.05 nM [ <sup>125</sup> I] 2-Iodomelatonin                                        |
| Vehicle:               | 1% DMSO                                                                            |
| Incubation Time/Temp:  | 3 hours @ 25°C                                                                     |
| Incubation Buffer:     | 25 mM HEPES, pH 7.4, 5 mM MgCl <sub>2</sub> ,<br>1 mM CaCl <sub>2</sub> , 0.5% BSA |
| Non-Specific Ligand:   | 1 μM 6-Chloromelatonin                                                             |
| K <sub>D</sub> :       | 0.054 nM *                                                                         |
| B <sub>MAX</sub> :     | 3.5 pmole/mg Protein *                                                             |
| Specific Binding:      | 97% *                                                                              |
| Quantitation Method:   | Radioligand Binding                                                                |
| Significance Criteria: | ≥ 50% of max stimulation or inhibition                                             |

### ■ 251700 Melatonin MT<sub>2</sub>

|                        |                                                                                    |
|------------------------|------------------------------------------------------------------------------------|
| Source:                | Human recombinant CHO-K1 cells                                                     |
| Ligand:                | 0.05 nM [ <sup>125</sup> I] 2-Iodomelatonin                                        |
| Vehicle:               | 1% DMSO                                                                            |
| Incubation Time/Temp:  | 4 hours @ 25°C                                                                     |
| Incubation Buffer:     | 25 mM HEPES, pH 7.4, 5 mM MgCl <sub>2</sub> ,<br>1 mM CaCl <sub>2</sub> , 0.1% BSA |
| Non-Specific Ligand:   | 1 μM 6-Chloromelatonin                                                             |
| K <sub>D</sub> :       | 0.054 nM *                                                                         |
| B <sub>MAX</sub> :     | 0.93 pmole/mg Protein *                                                            |
| Specific Binding:      | 98% *                                                                              |
| Quantitation Method:   | Radioligand Binding                                                                |
| Significance Criteria: | ≥ 50% of max stimulation or inhibition                                             |

## Selected NMR spectra of synthesized compounds

## S2. <sup>1</sup>H NMR spectrum of cyano(*N*-methyl-2-oxo-5-methoxy indolin-3-ylidene)acetic acid (**2g**)

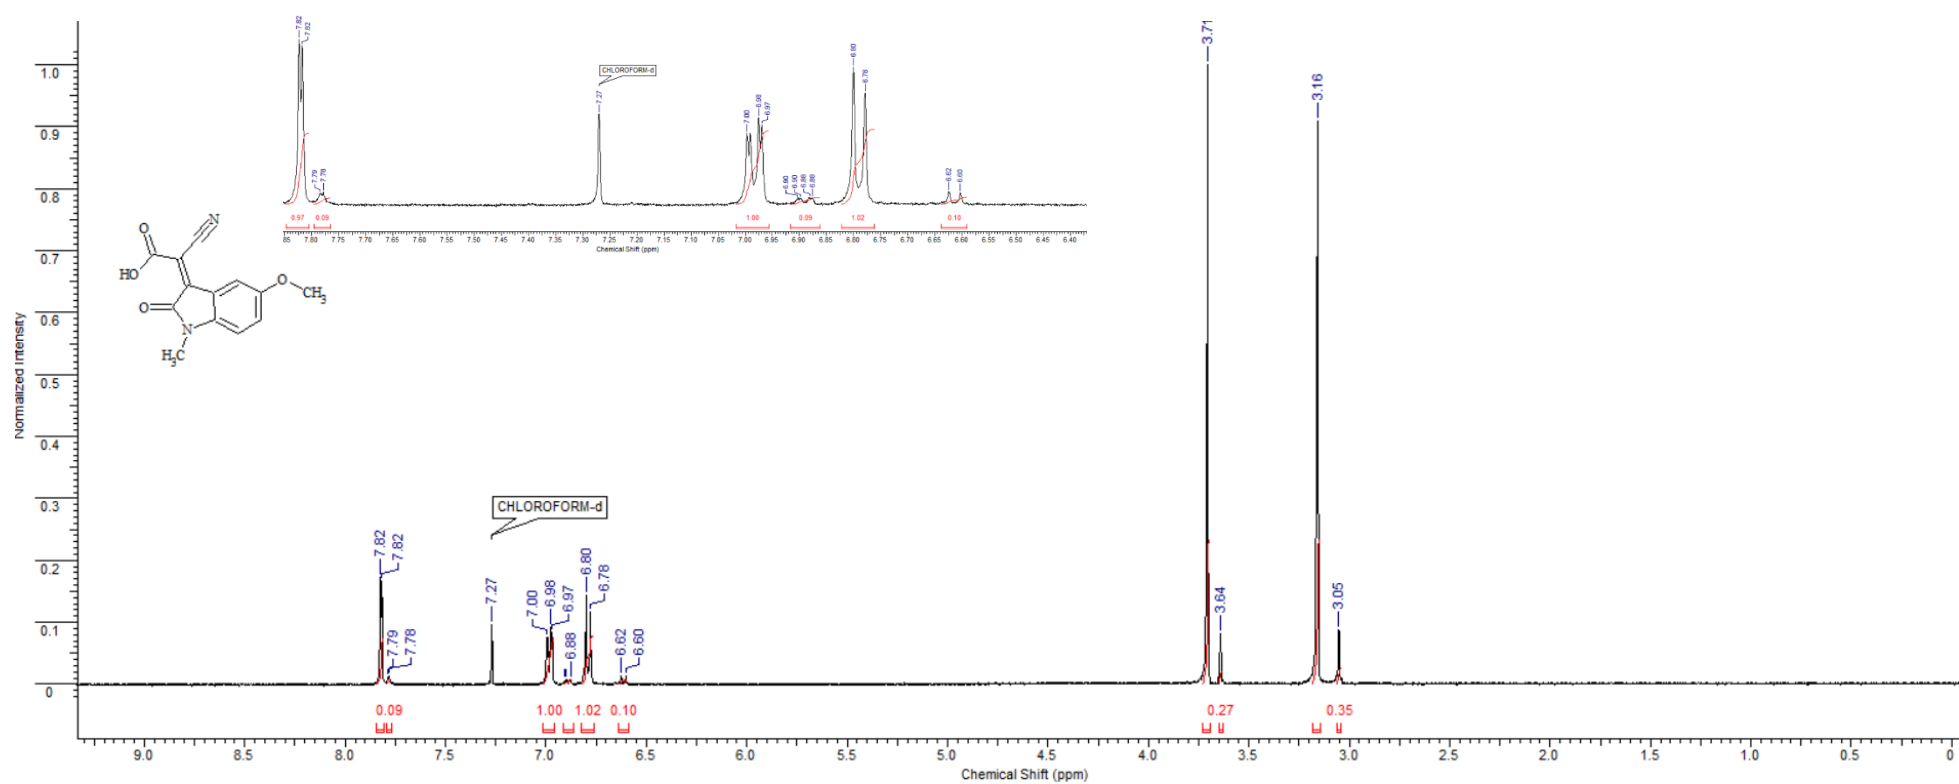

S3. <sup>13</sup>C NMR spectrum of cyano(*N*-methyl-2-oxo-5-methoxy indolin-3-ylidene)acetic acid (**2g**)

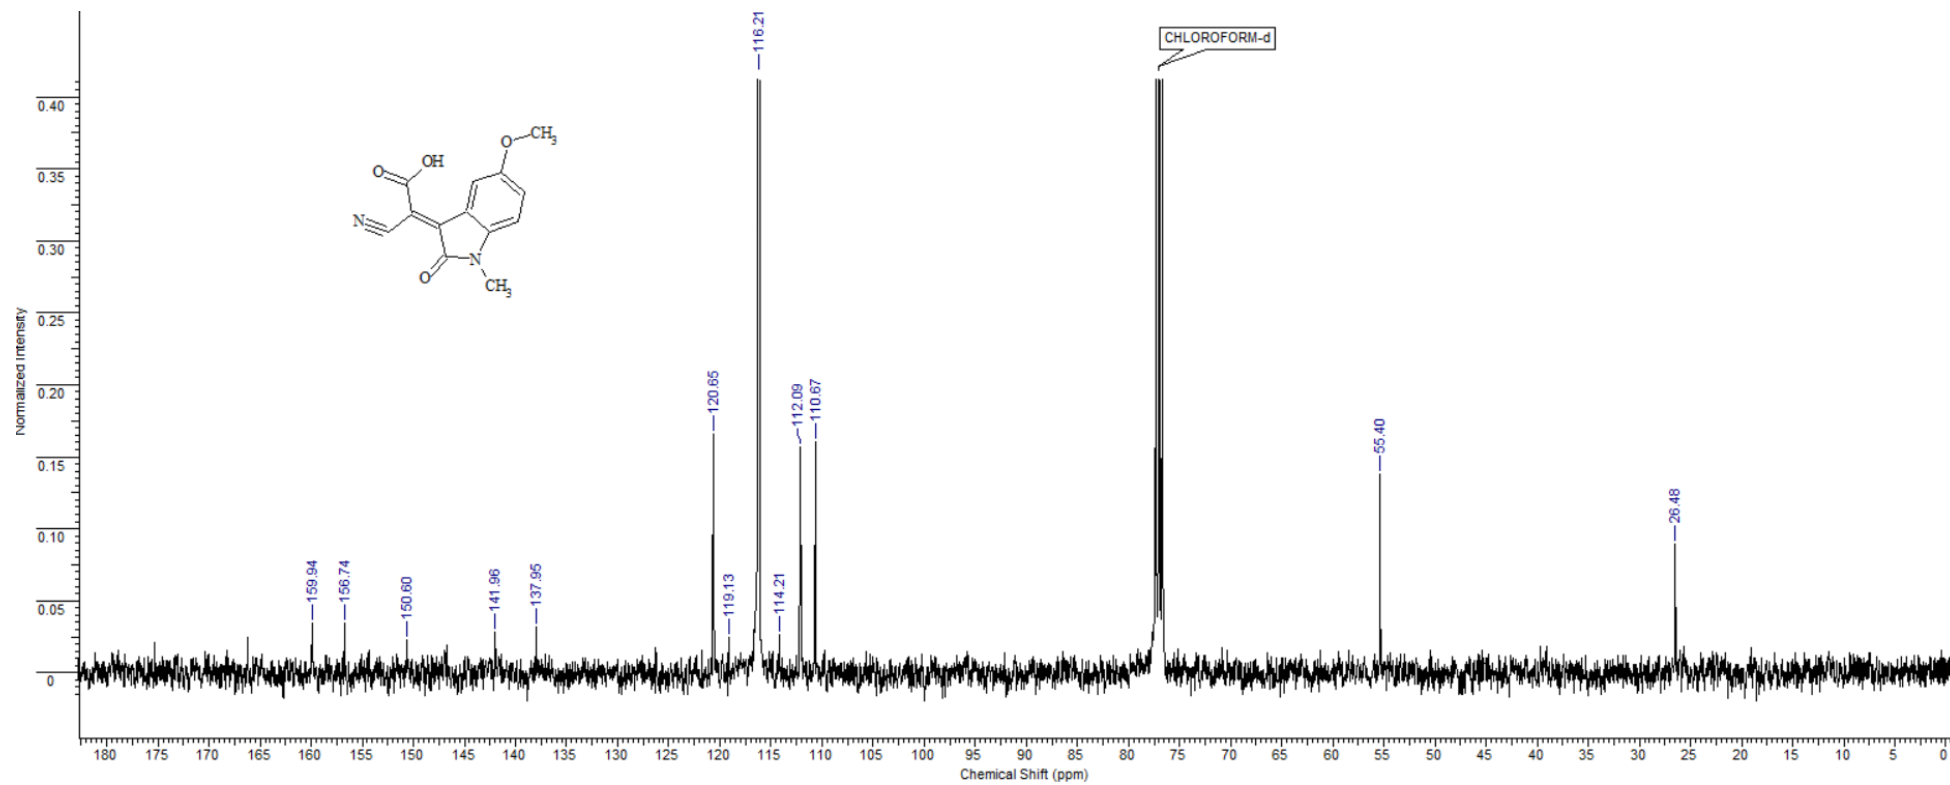

S4.  $^1\text{H}$  NMR spectrum of 2-(5-Bromo-1-methyl-2-oxo-2,3-dihydro-1H-indol-3-ylidene)acetonitrile (**3i**)

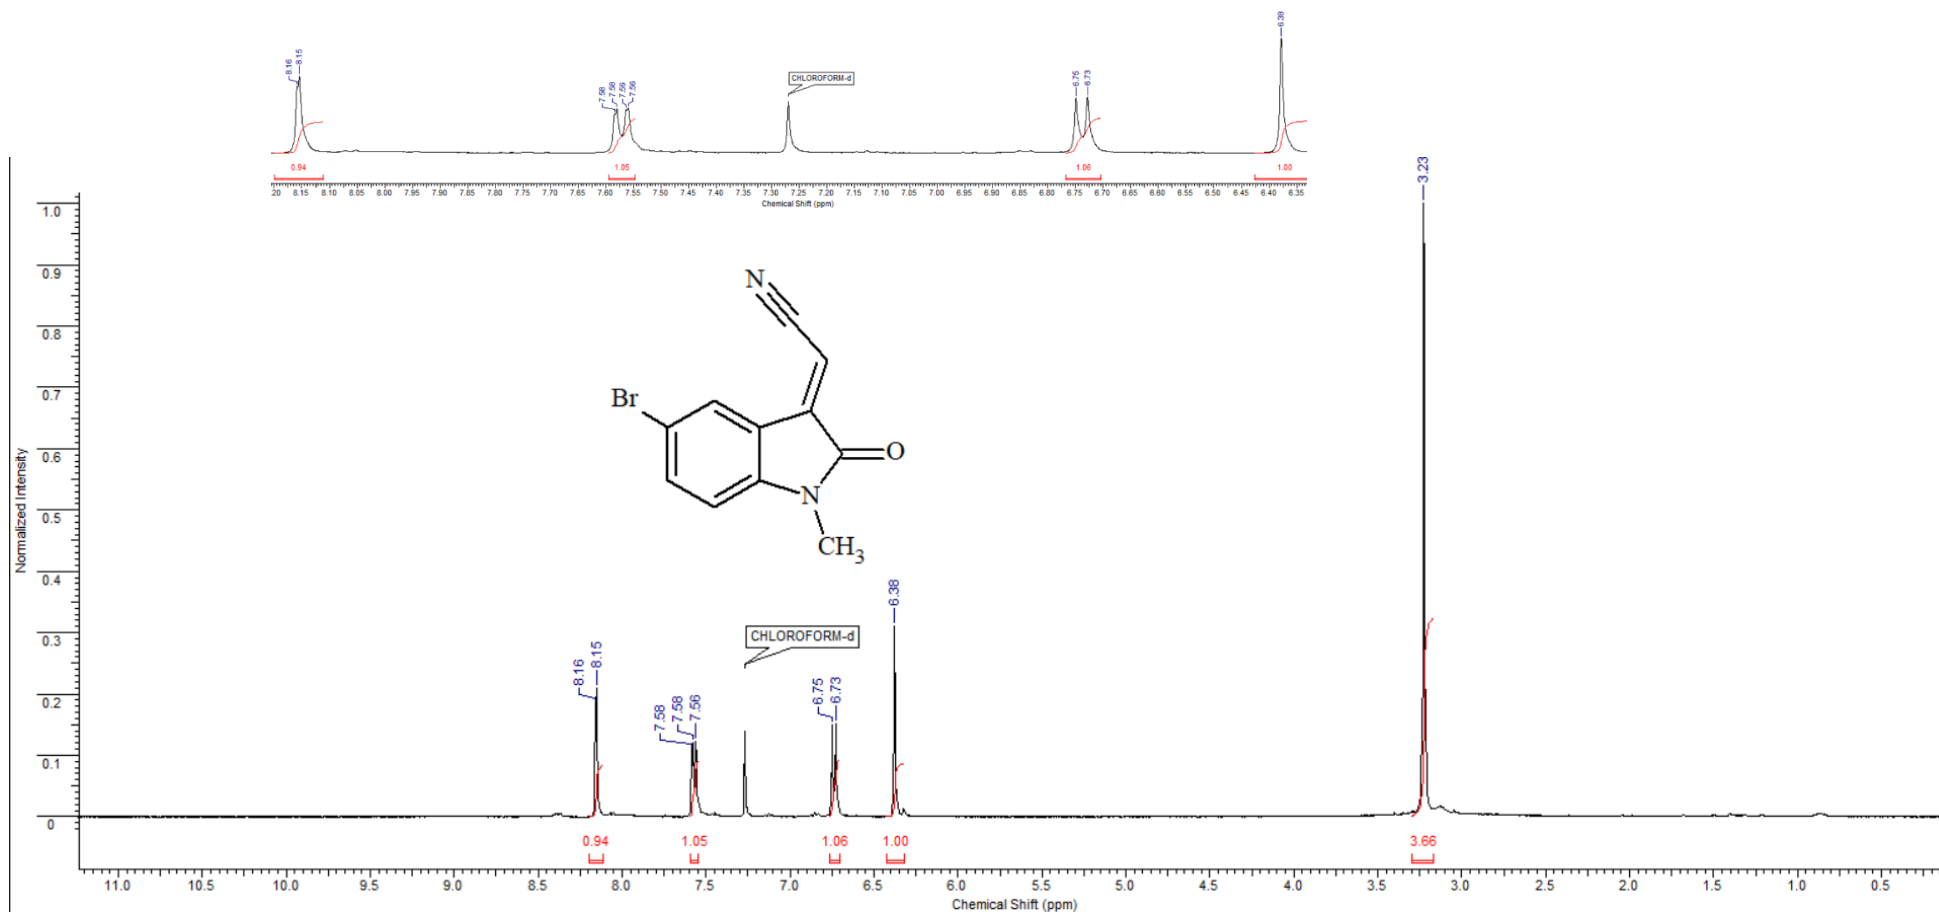

S5  $^1\text{H}$  NMR spectrum of 2-(1,6,7-Trimethyl-2-oxo-2,3-dihydro-1*H*-indol-3-ylidene)acetonitrile (**3j**)

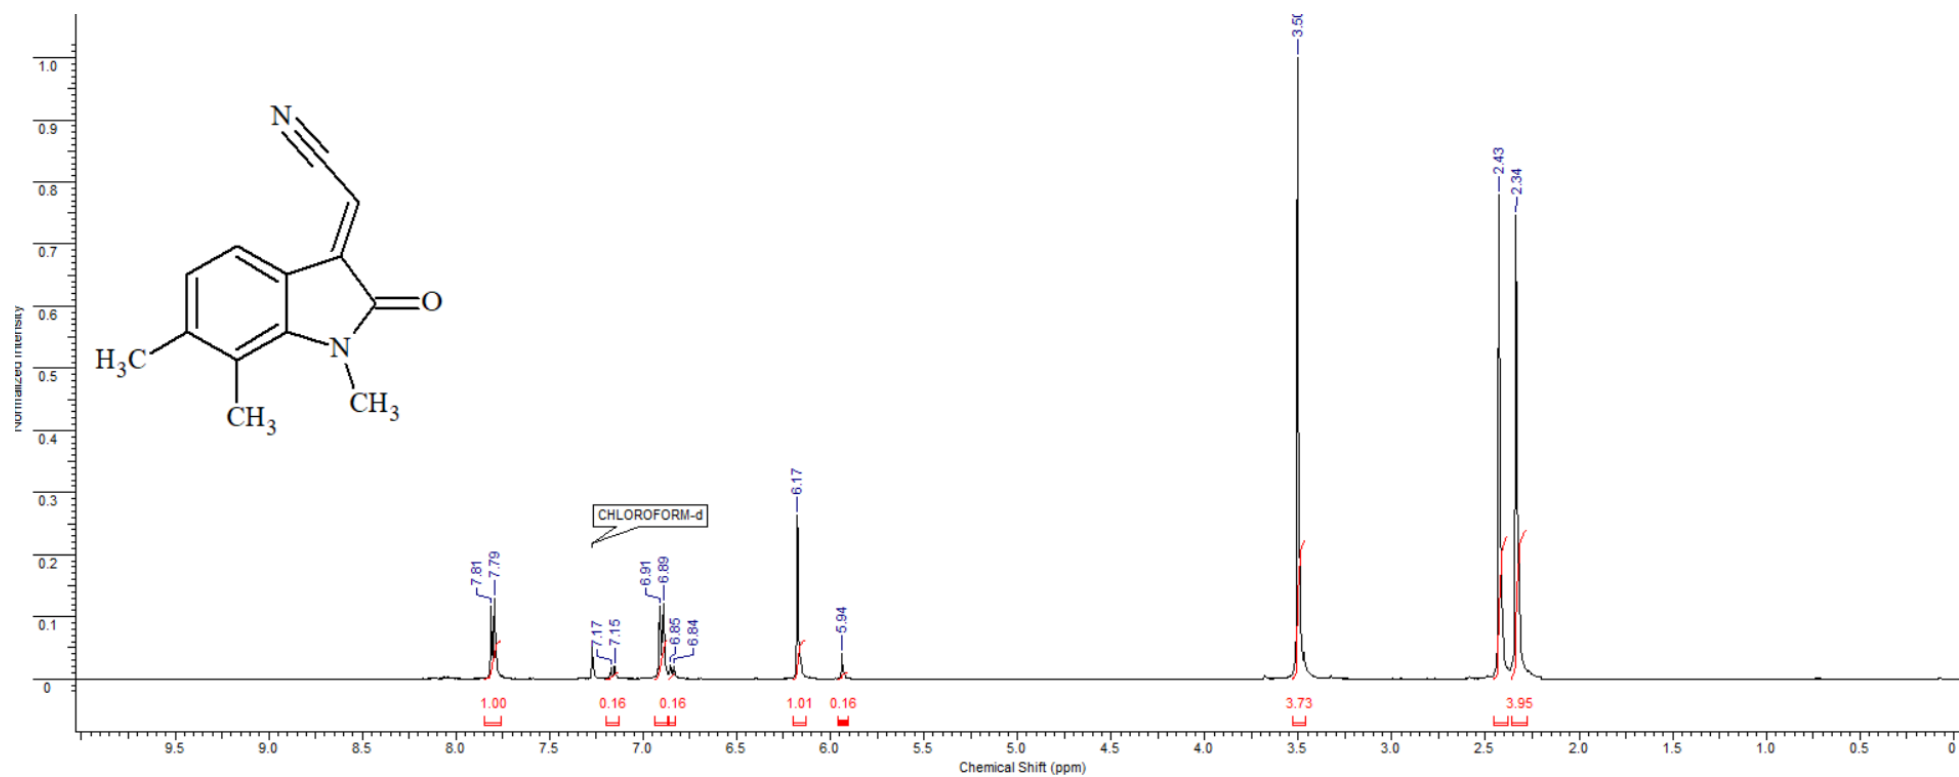

S6  $^{13}\text{C}$  NMR spectrum of 2-(1,6,7-Trimethyl-2-oxo-2,3-dihydro-1*H*-indol-3-ylidene)acetonitrile (**3j**)

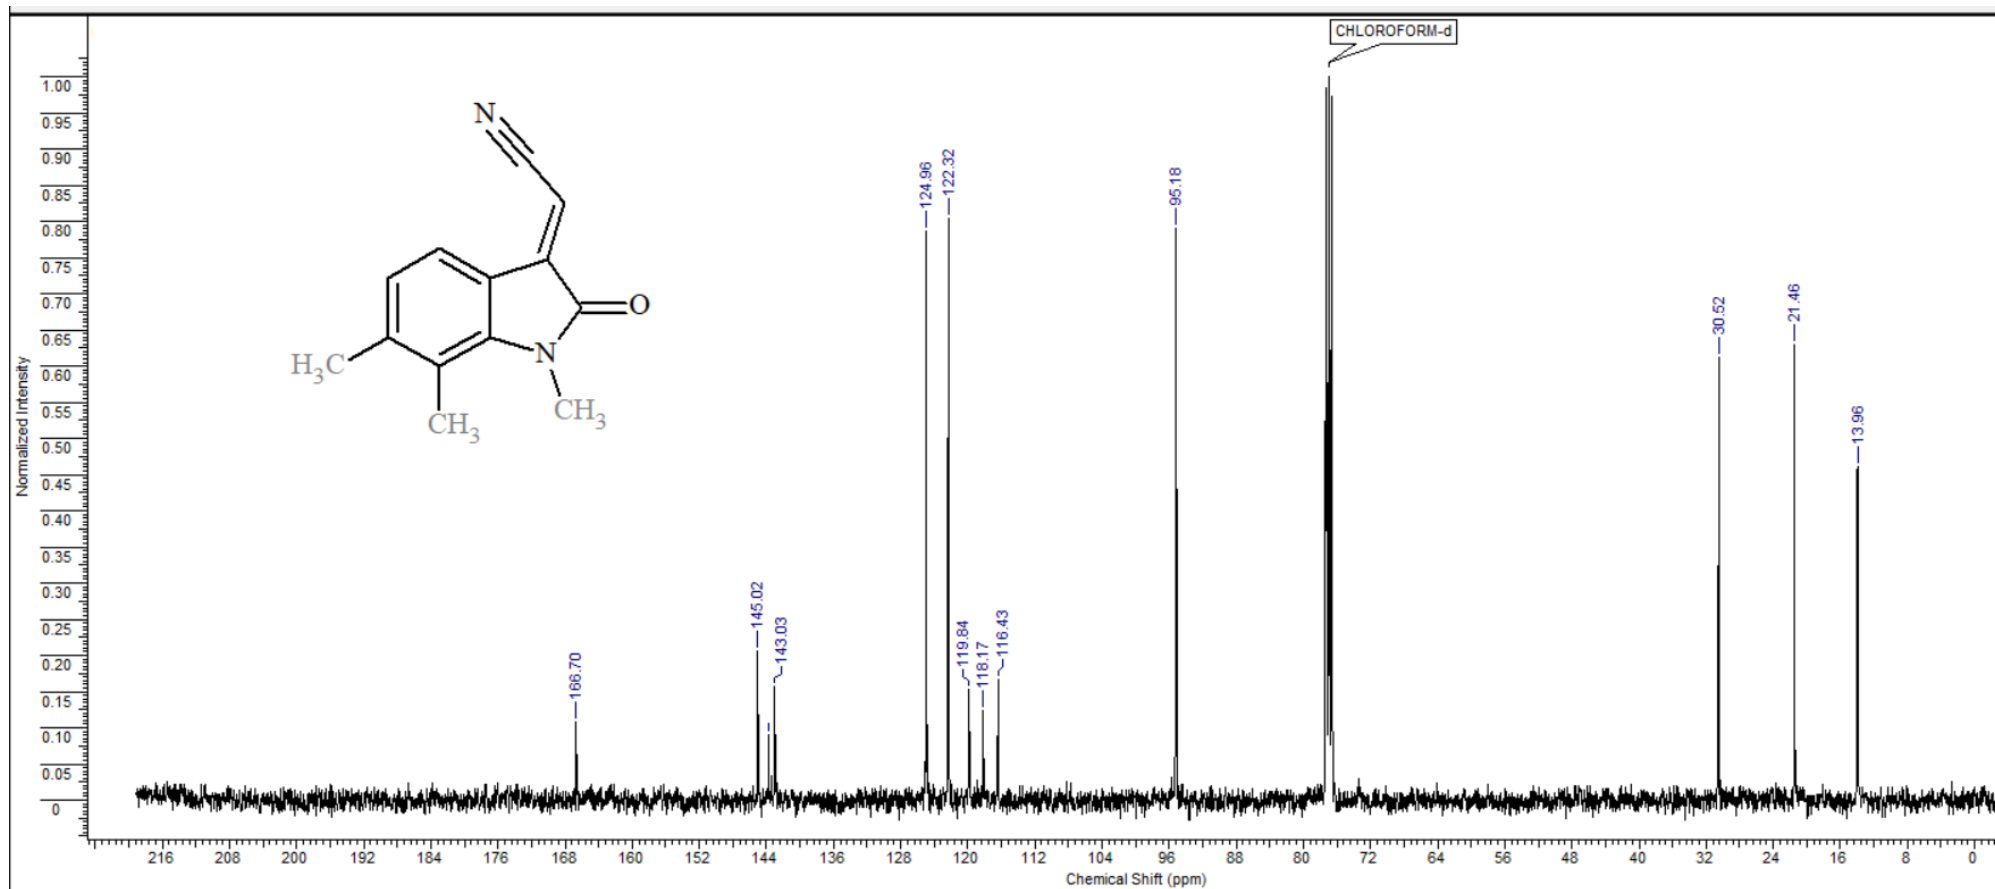

S7  $^1\text{H}$  NMR spectrum of 2-(1-methyl-5-methoxy-2-oxo-2,3-dihydro-1*H*-indol-3-yl)acetonitrile (**4g**)

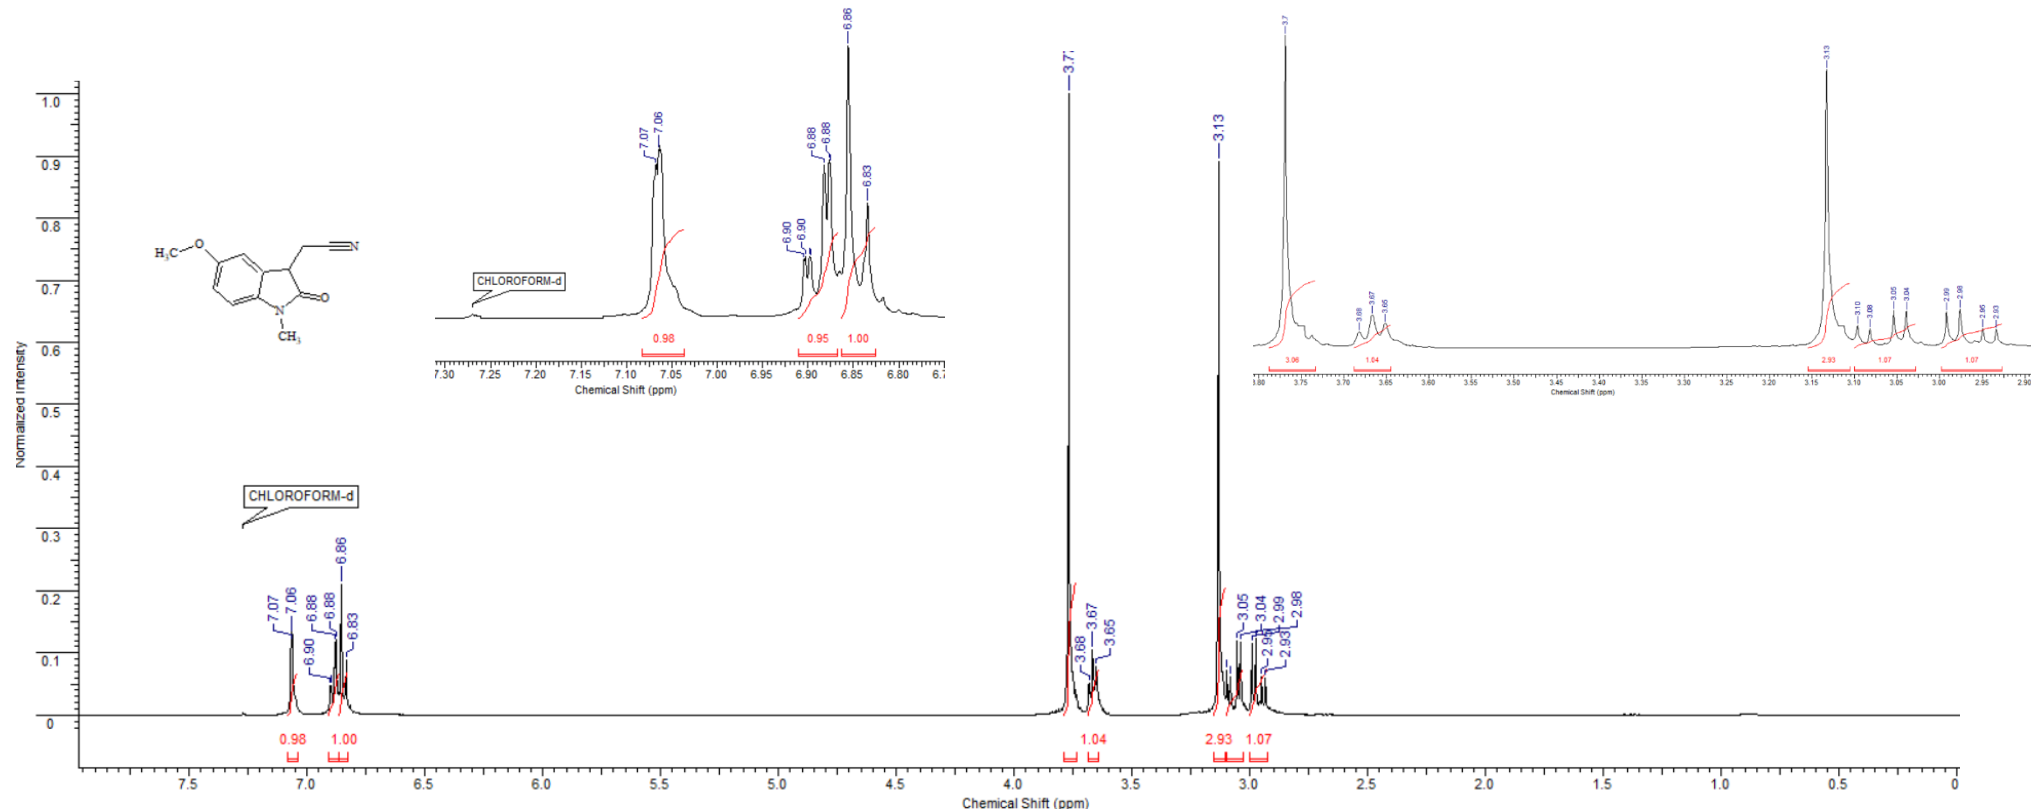

S8  $^1\text{H}$  NMR spectrum of 2-(5-bromo-1-methyl-2-oxo-2,3-dihydro-1*H*-indol-3-yl)acetonitrile (**4i**)

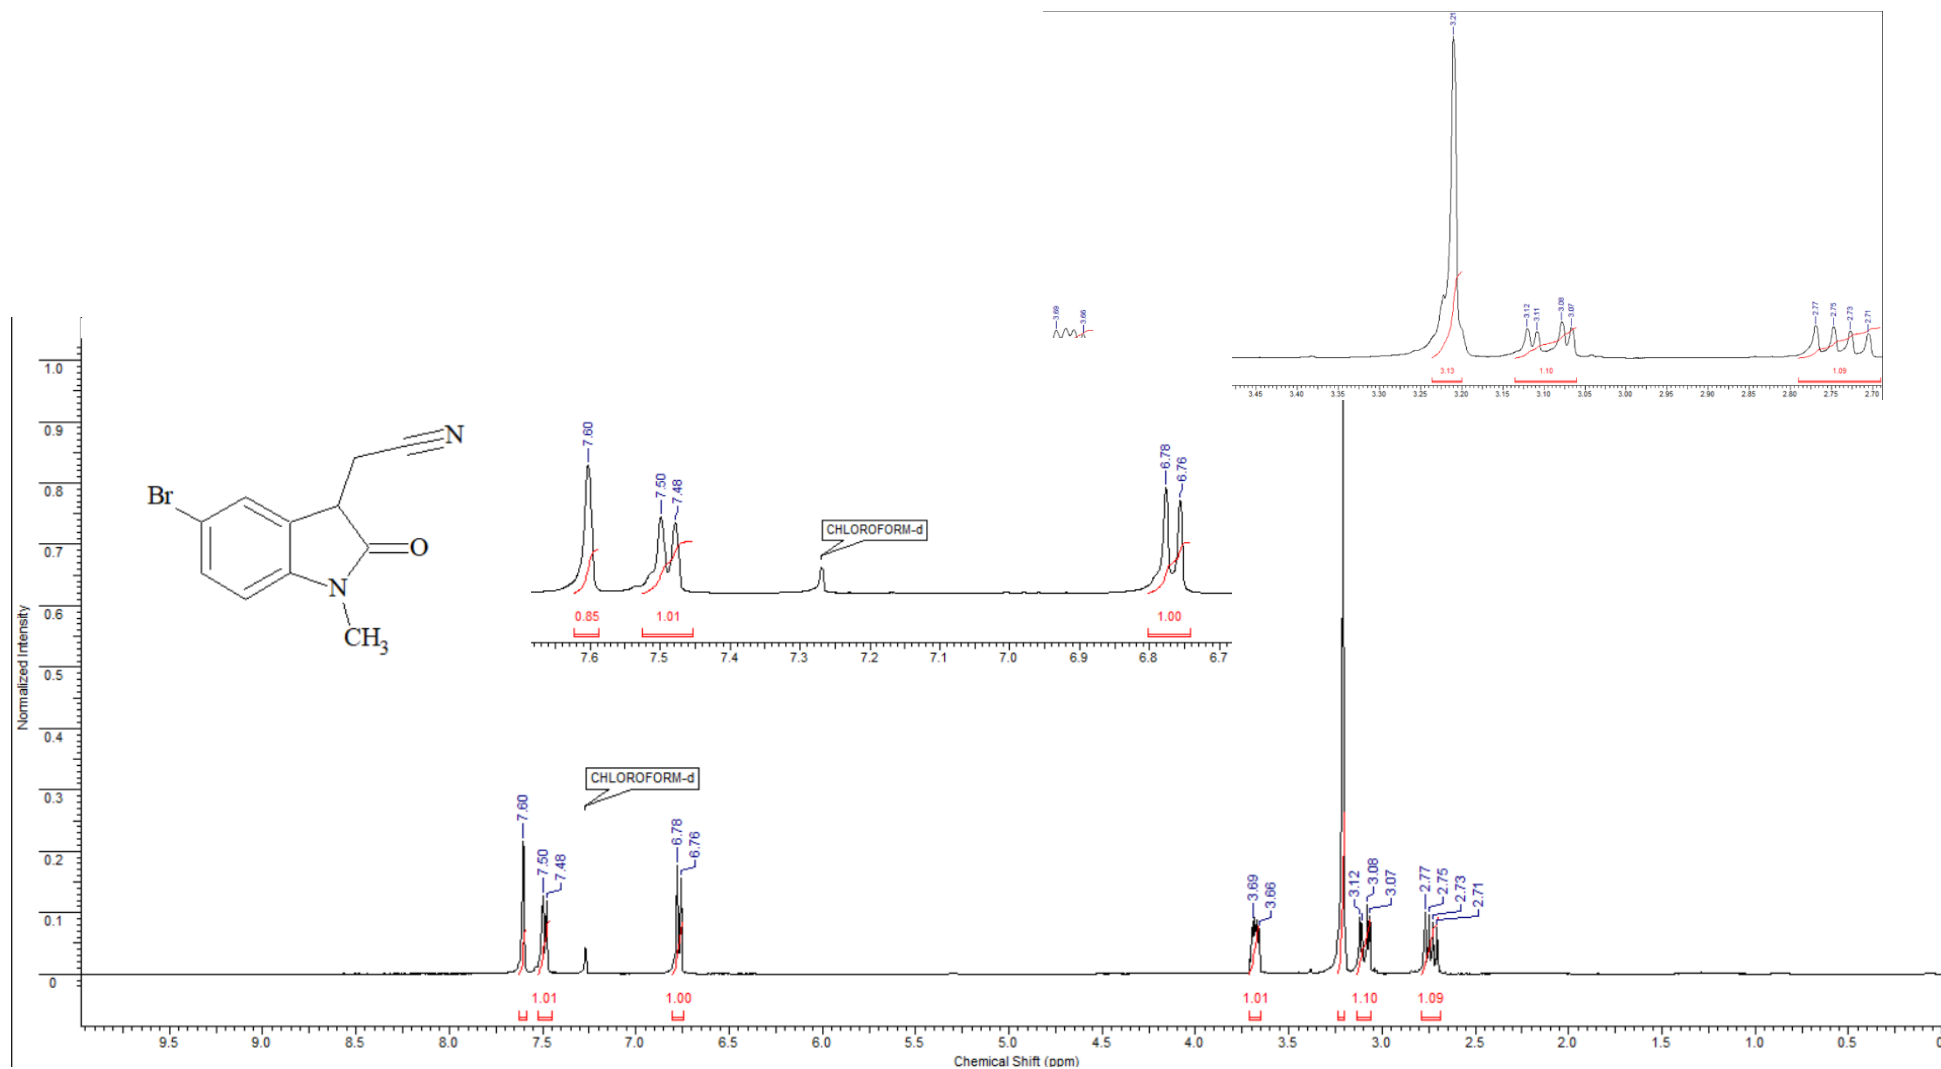

S9 <sup>13</sup>C NMR spectrum of 2-(5-Bromo-1-methyl-2-oxo-2,3-dihydro-1H-indol-3-yl)acetonitrile (**4i**)

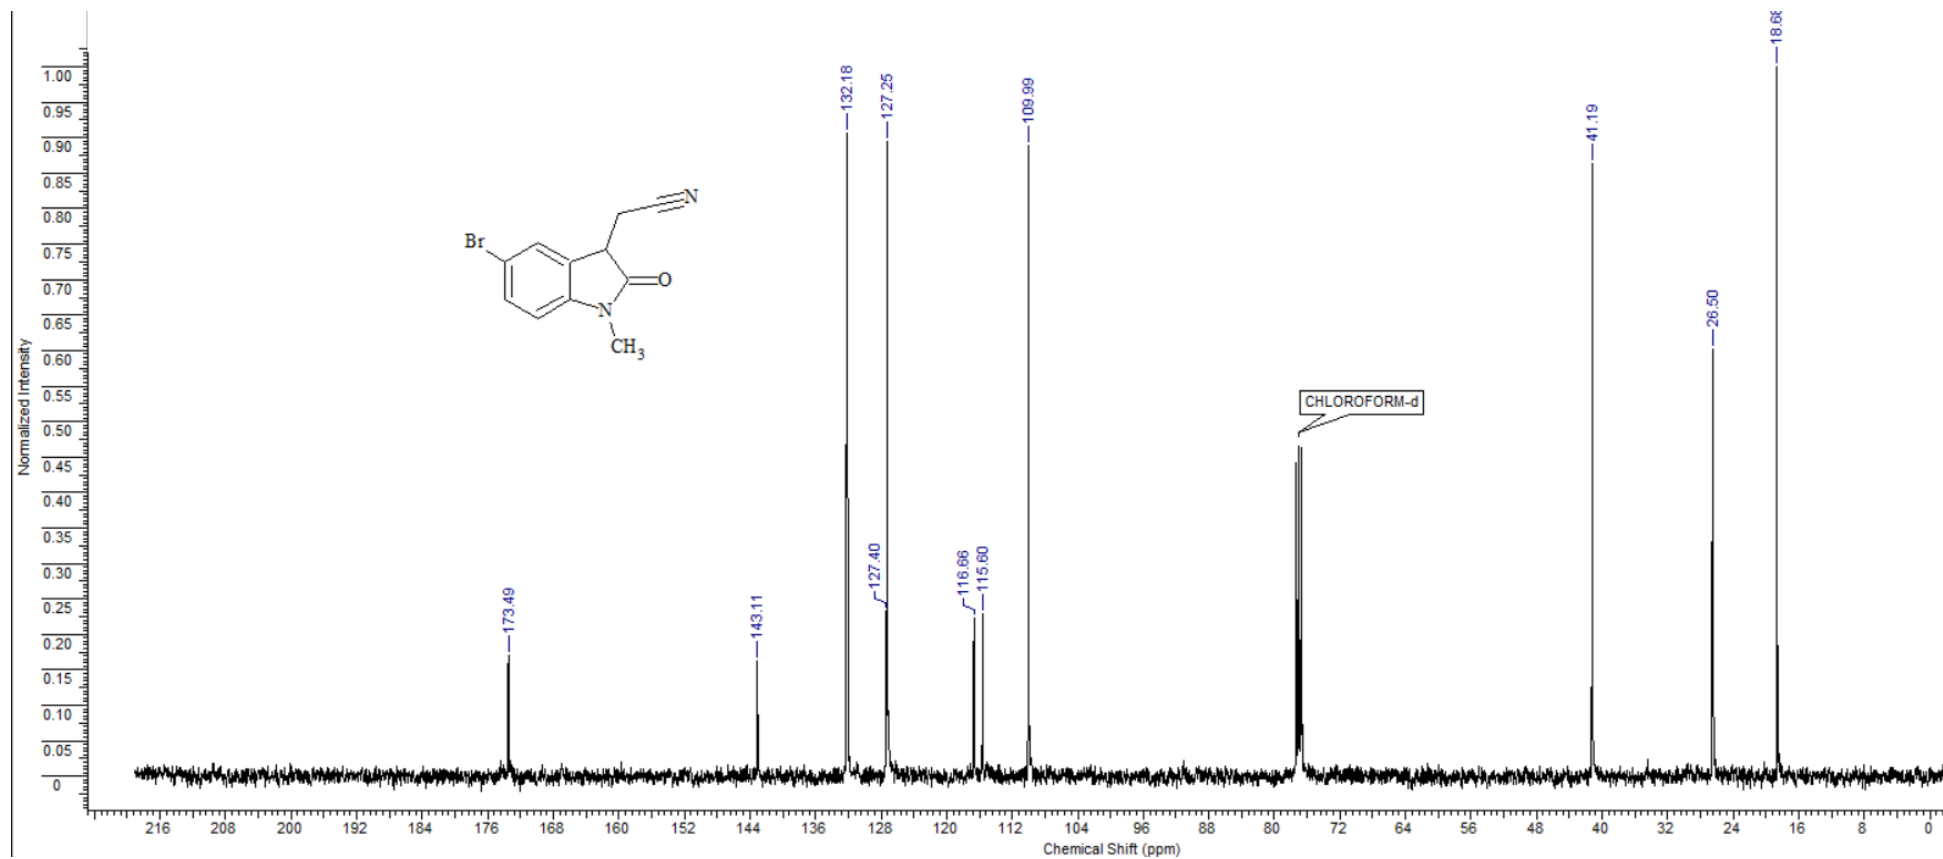

S10 <sup>1</sup>H NMR spectrum of Tert-butyl 3-(cyanomethyl)-2-oxo-2,3-dihydro-1*H*-indol-1-carboxylate (**4k**)

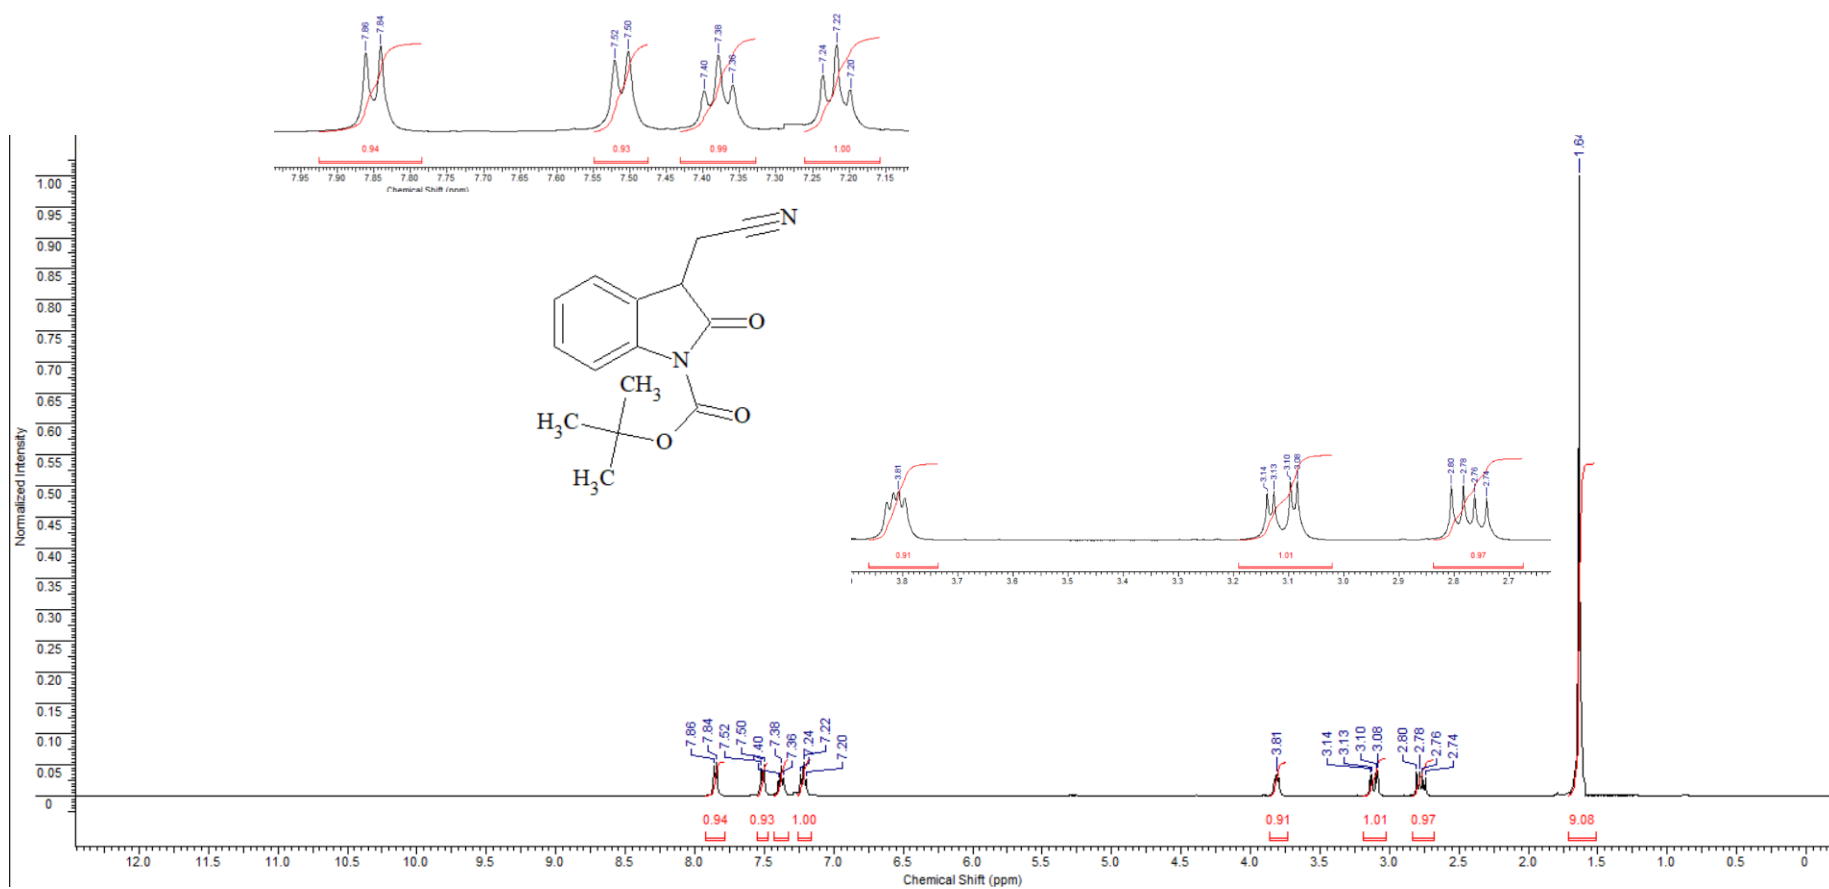

S11  $^{13}\text{C}$  NMR spectrum of Tert-butyl 3-(cyanomethyl)-2-oxo-2,3-dihydro-1*H*-indol-1-carboxylate (**4k**)

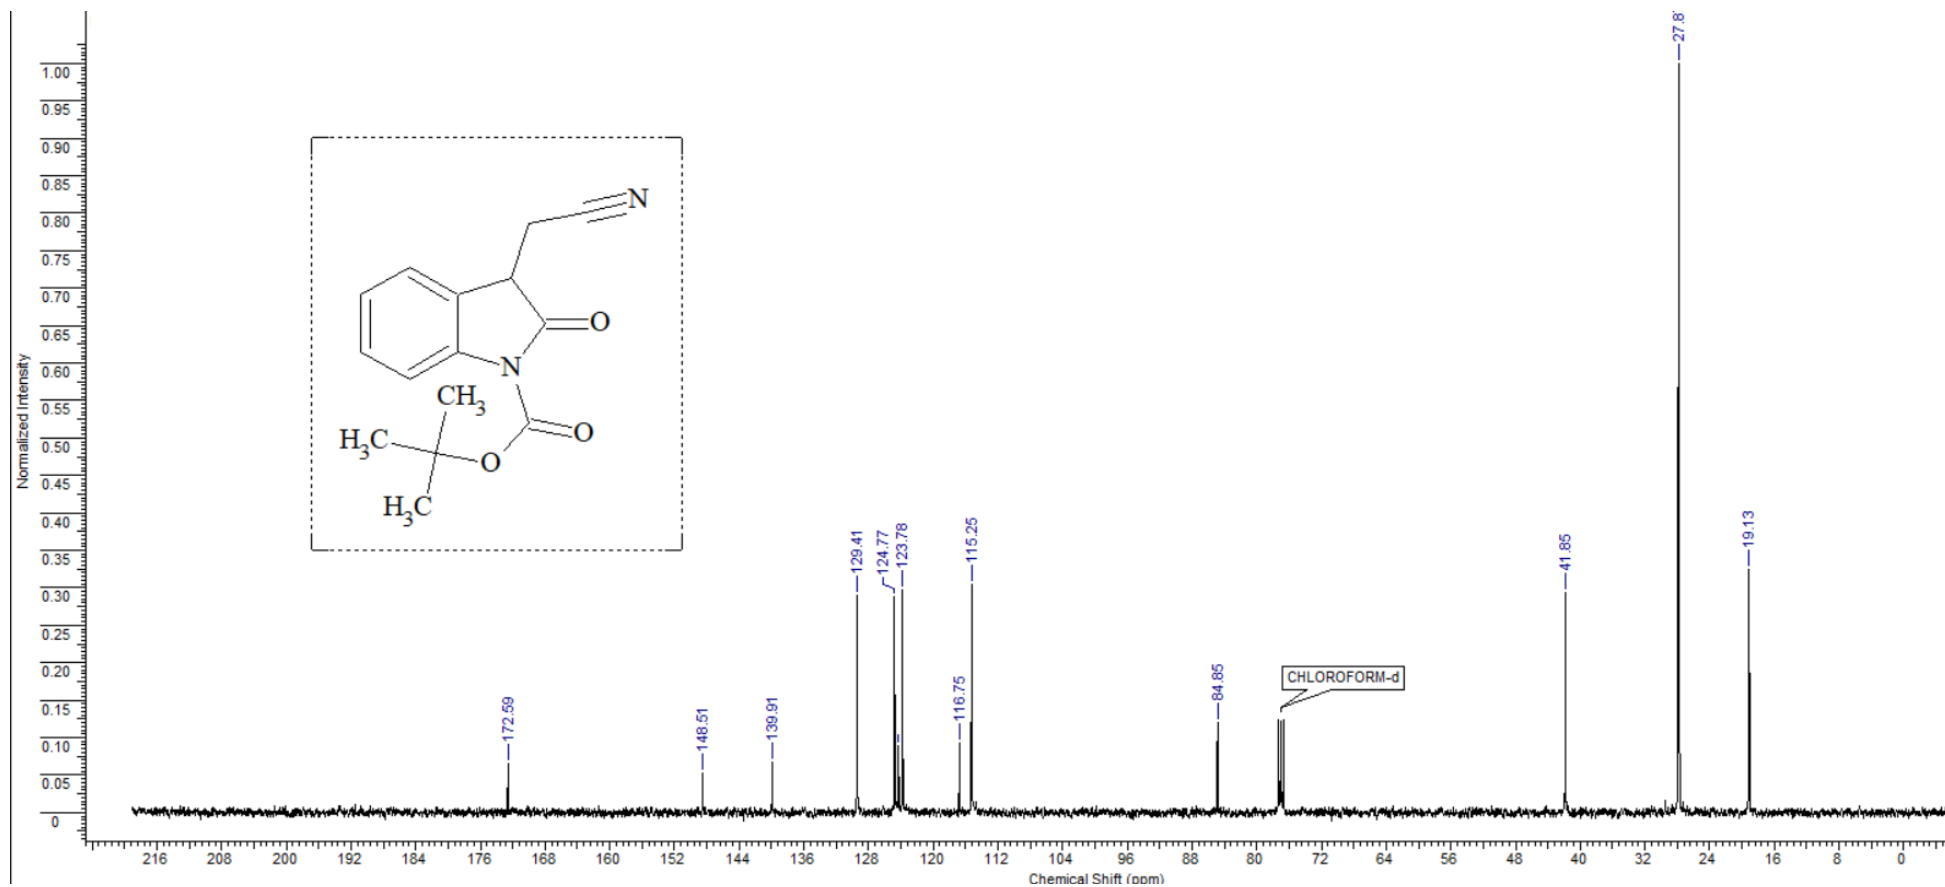

S12 <sup>1</sup>H NMR spectrum of Tert-butyl 5-methoxy-3-(cyanomethyl)-2-oxo-2,3-dihydro-1H-indol-1-carboxylate  
(41)

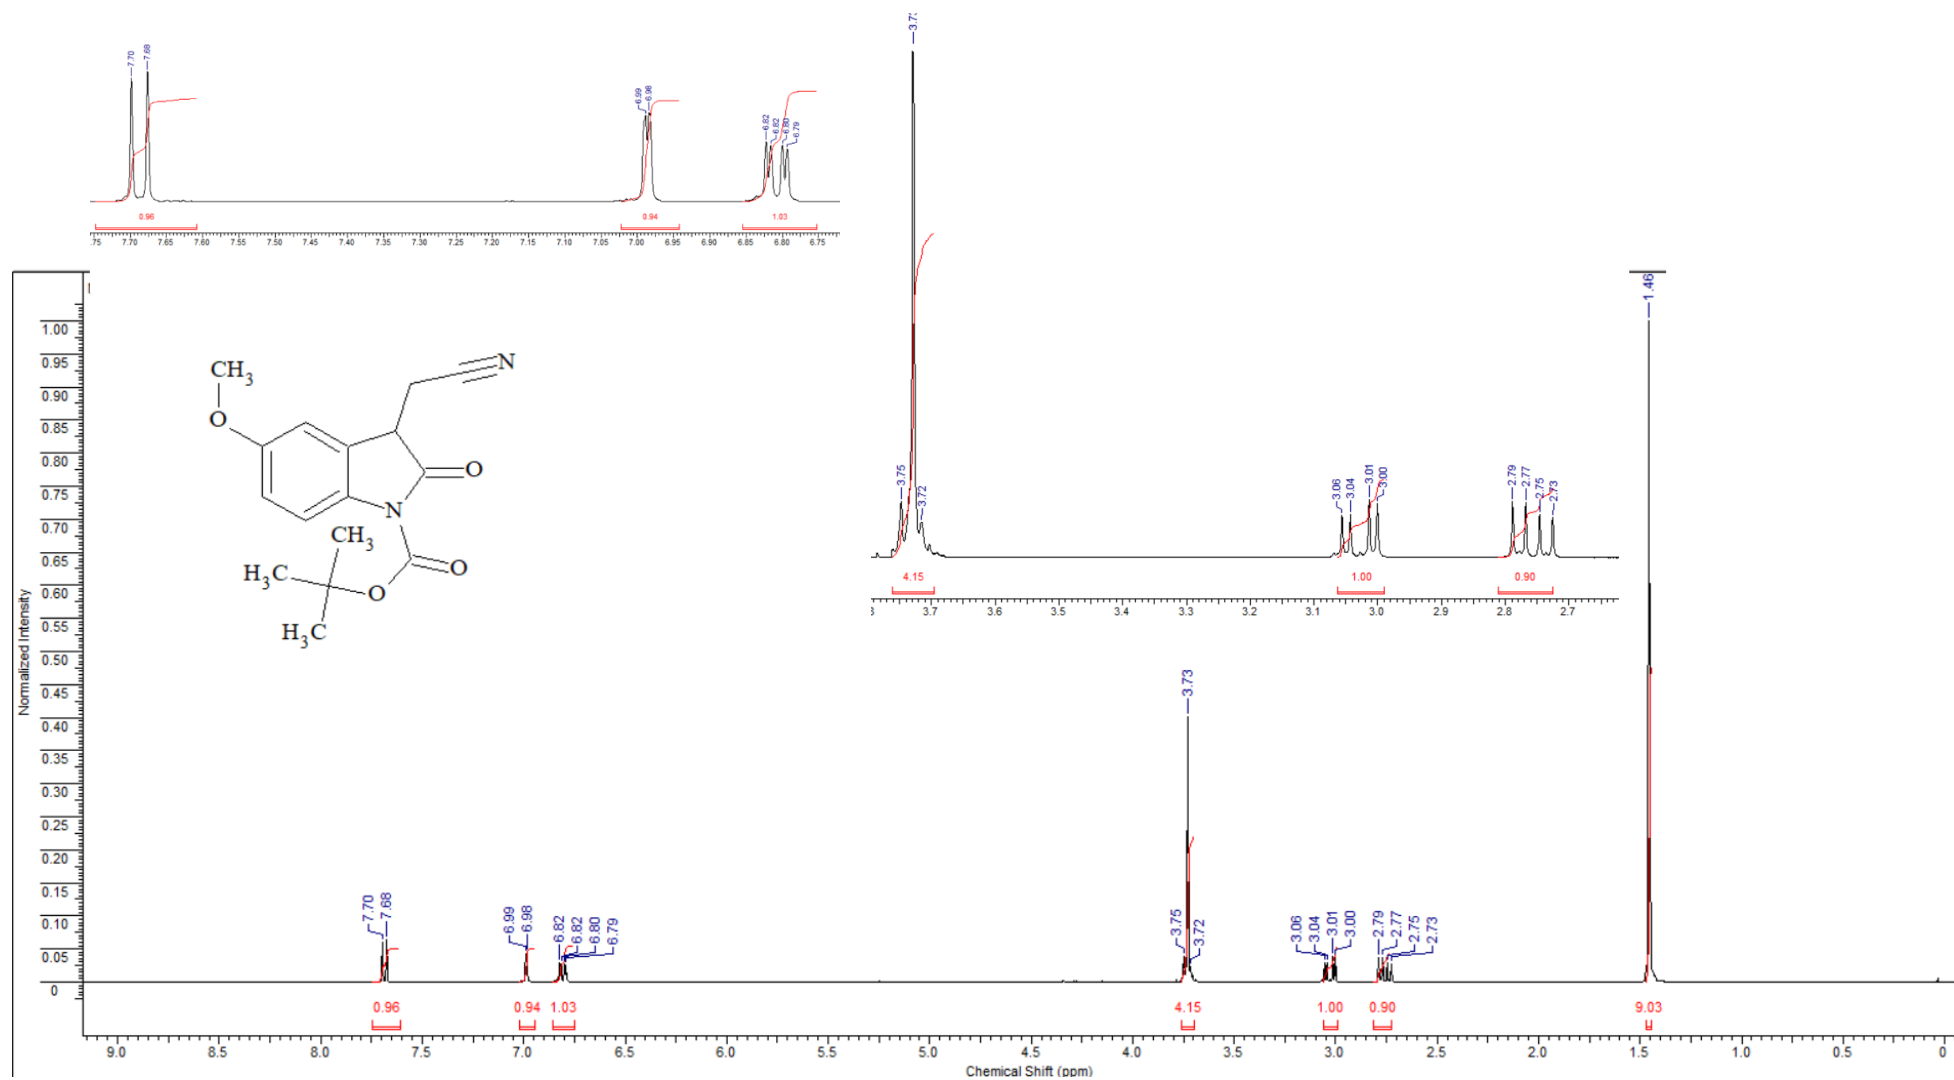

S13  $^{13}\text{C}$  NMR spectrum of Tert-butyl 5-methoxy-3-(cyanomethyl)-2-oxo-2,3-dihydro-1H-indol-1-carboxylate (**4l**)

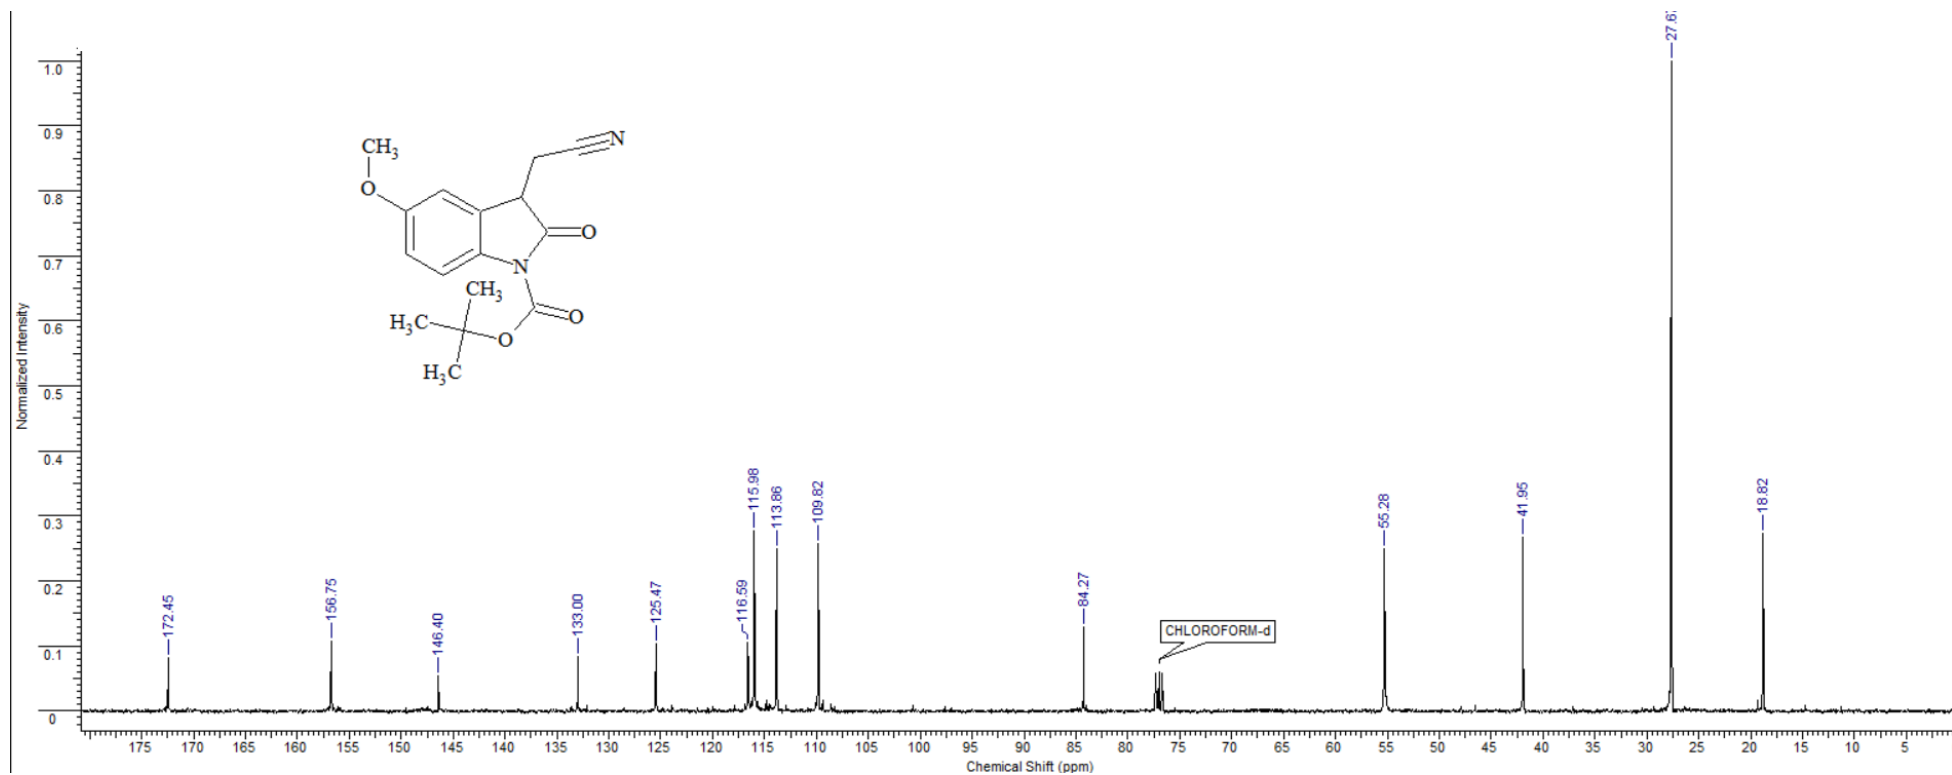

S14 <sup>1</sup>H NMR spectrum of 1,3-Di-tert-butyl 3-cyanomethyl-2-oxo-2,3-dihydro-1H-indol-1,3-dicarboxylate  
(4m)

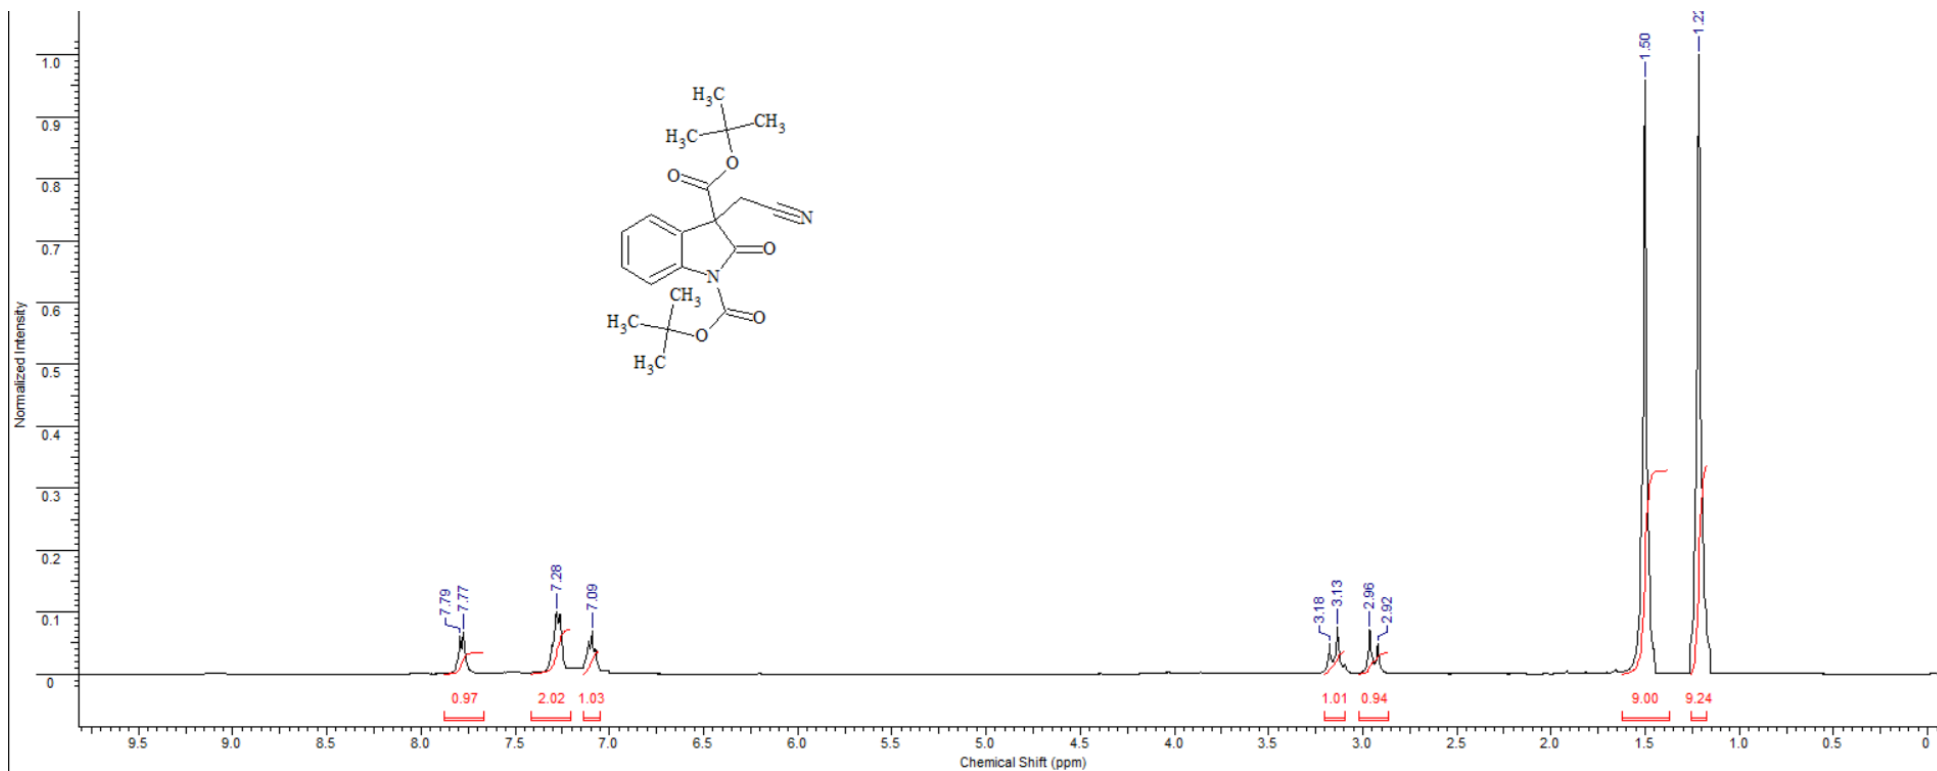

S15. <sup>13</sup>C NMR spectrum of 1,3-Di-tert-butyl 3-cyanomethyl-2-oxo-2,3-dihydro-1H-indol-1,3-dicarboxylate  
(4m)

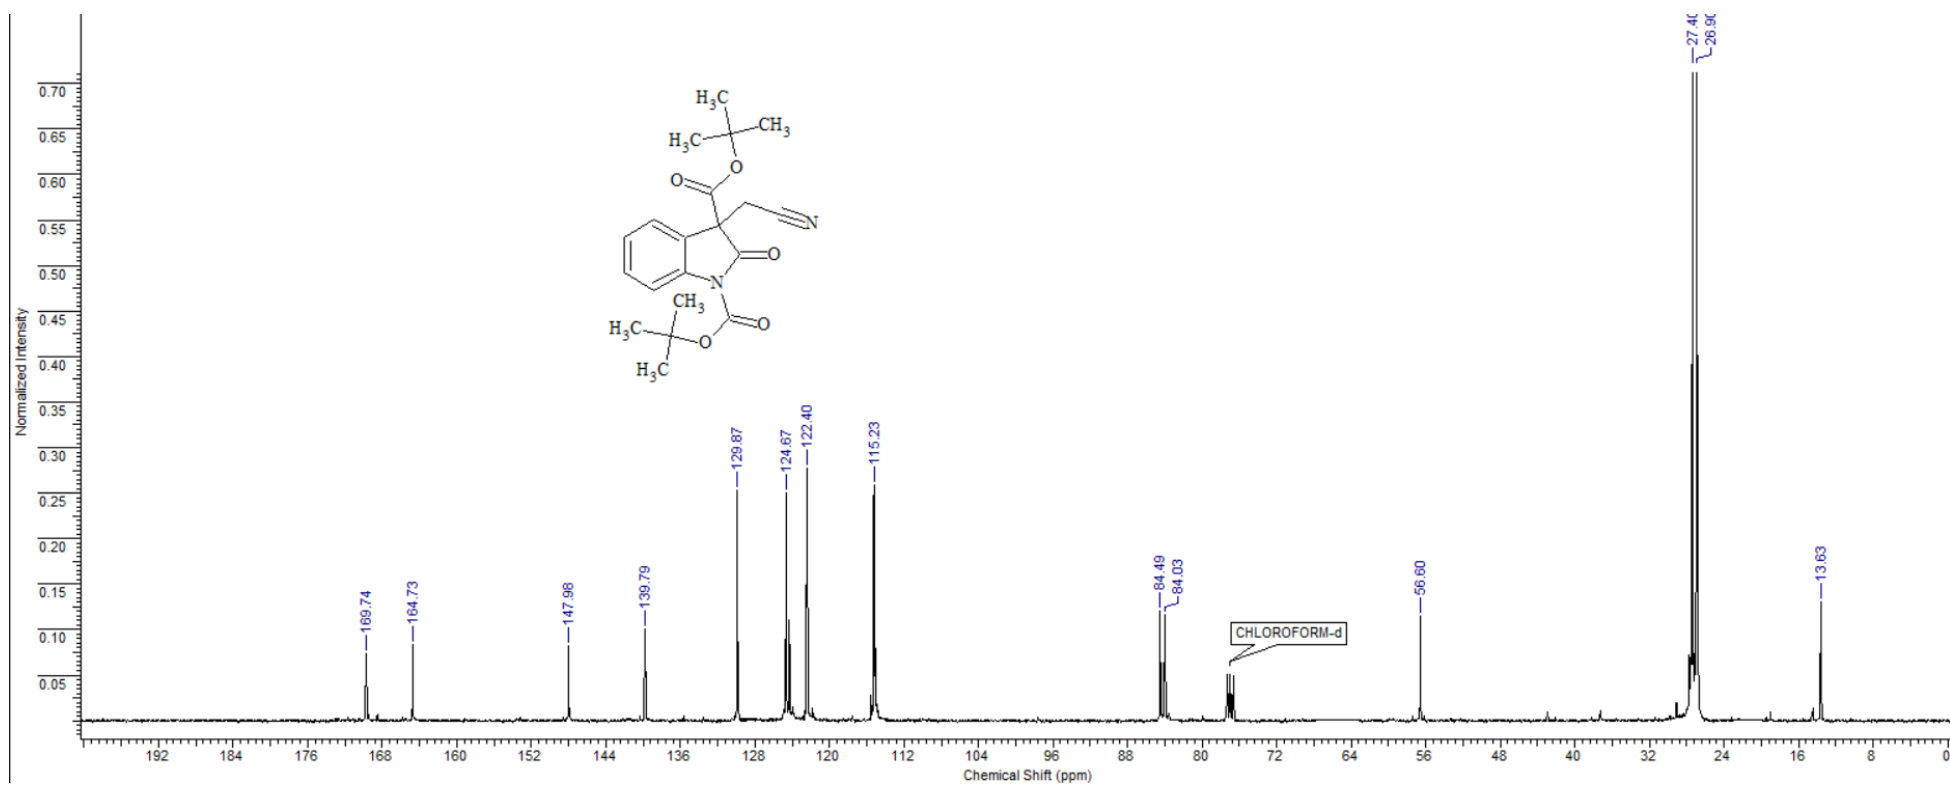

S16  $^1\text{H}$  NMR spectrum of 2-(1,3-Dimethyl-2-oxo-2,3-dihydro-1H-indol-3-yl)acetonitrile (**5a**)

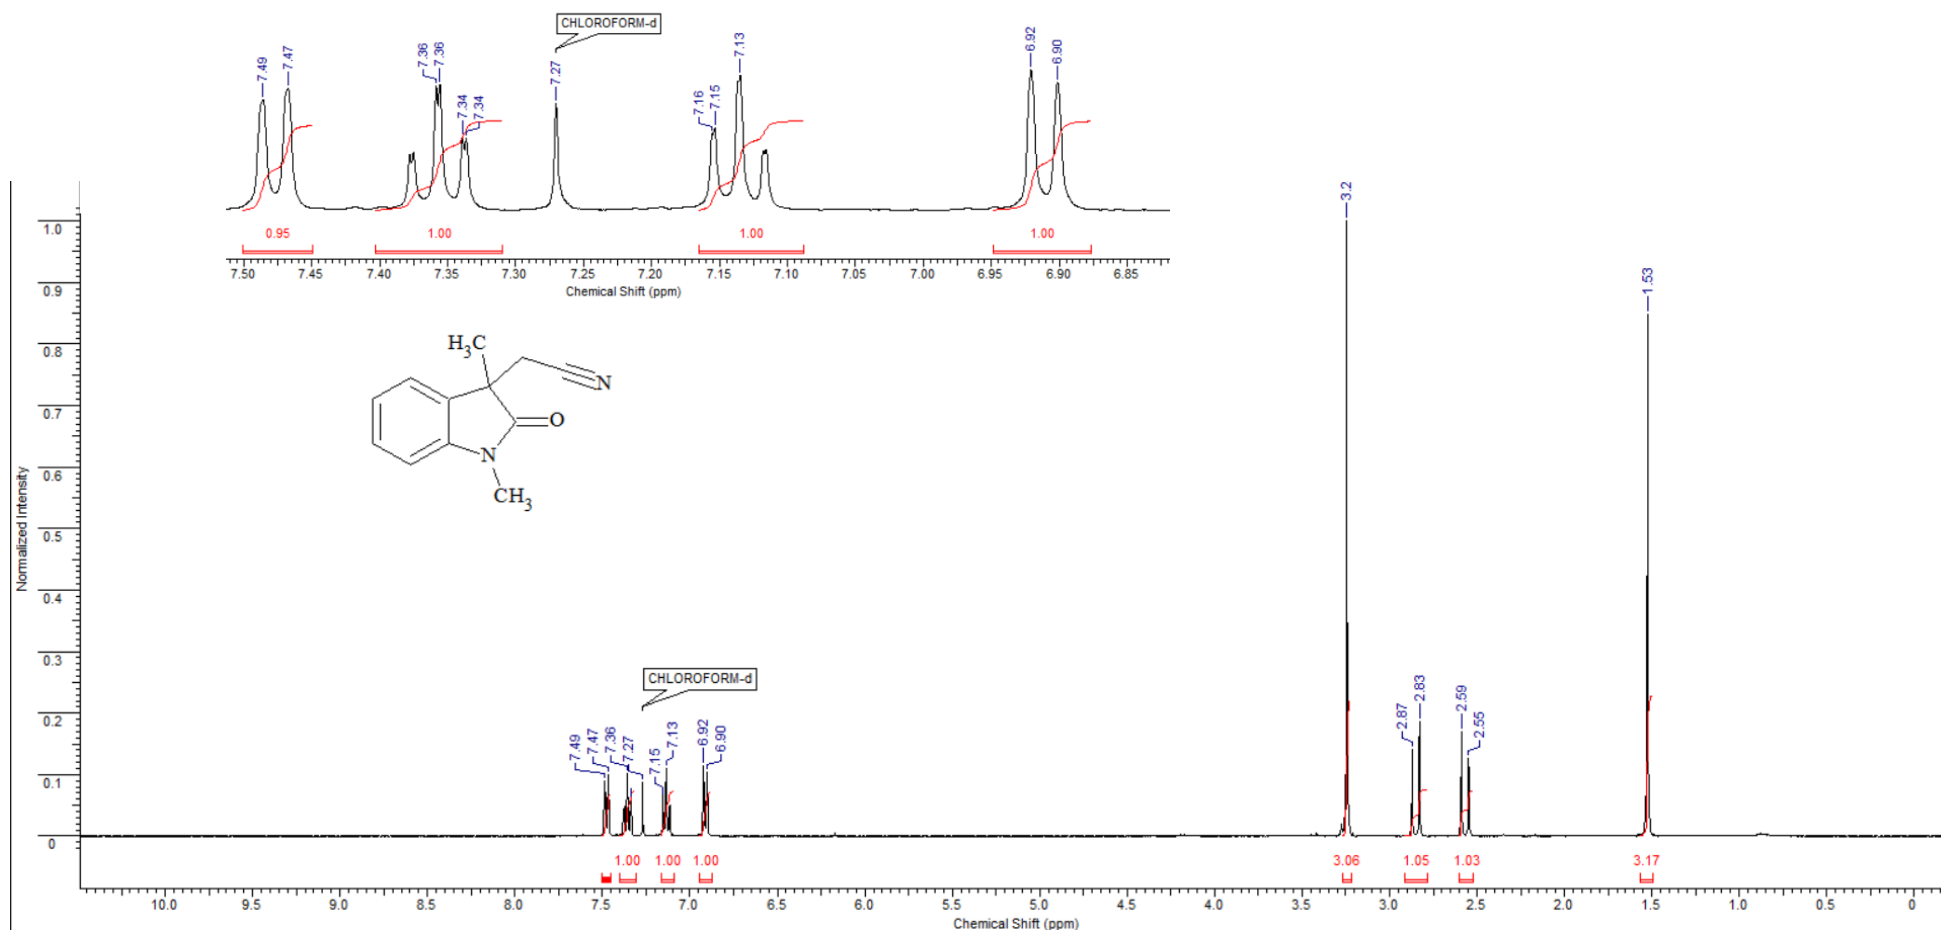

S17  $^{13}\text{C}$  NMR spectrum of 2-(1,3-Dimethyl-2-oxo-2,3-dihydro-1H-indol-3-yl)acetonitrile (**5a**)

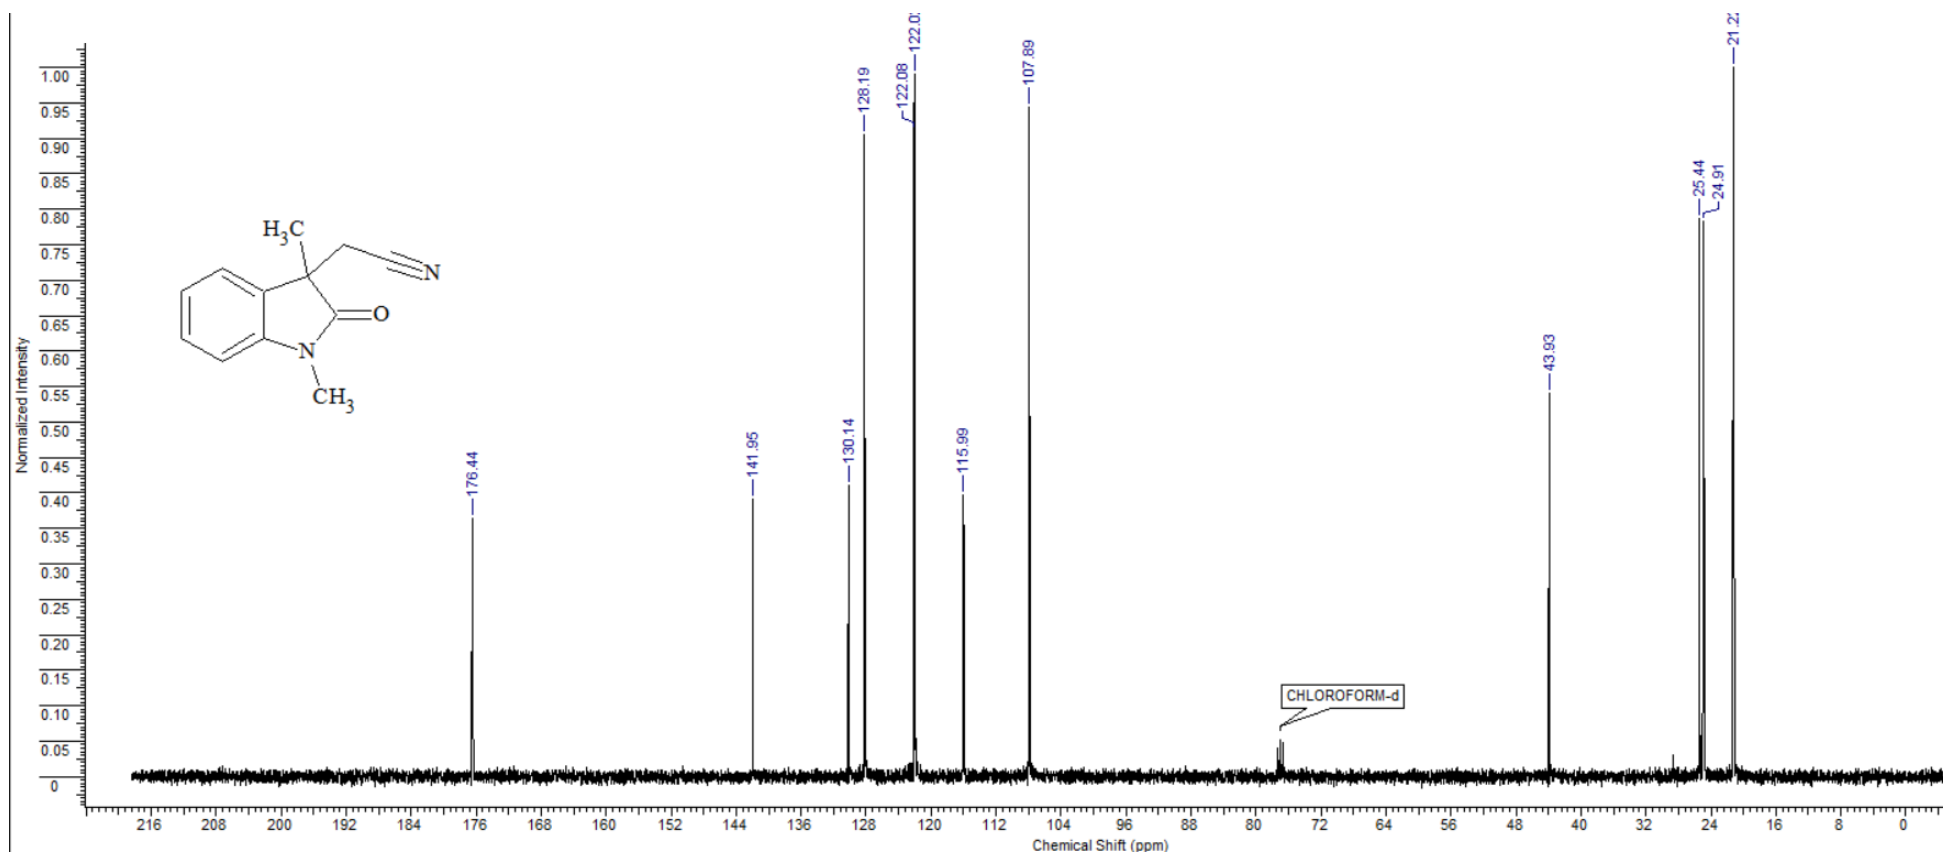

S18 <sup>1</sup>H NMR spectrum of 2-(1-Benzyl-3-methyl-2-oxo-2,3-dihydro-1*H*-indol-3-yl)acetonitrile (**5b**)

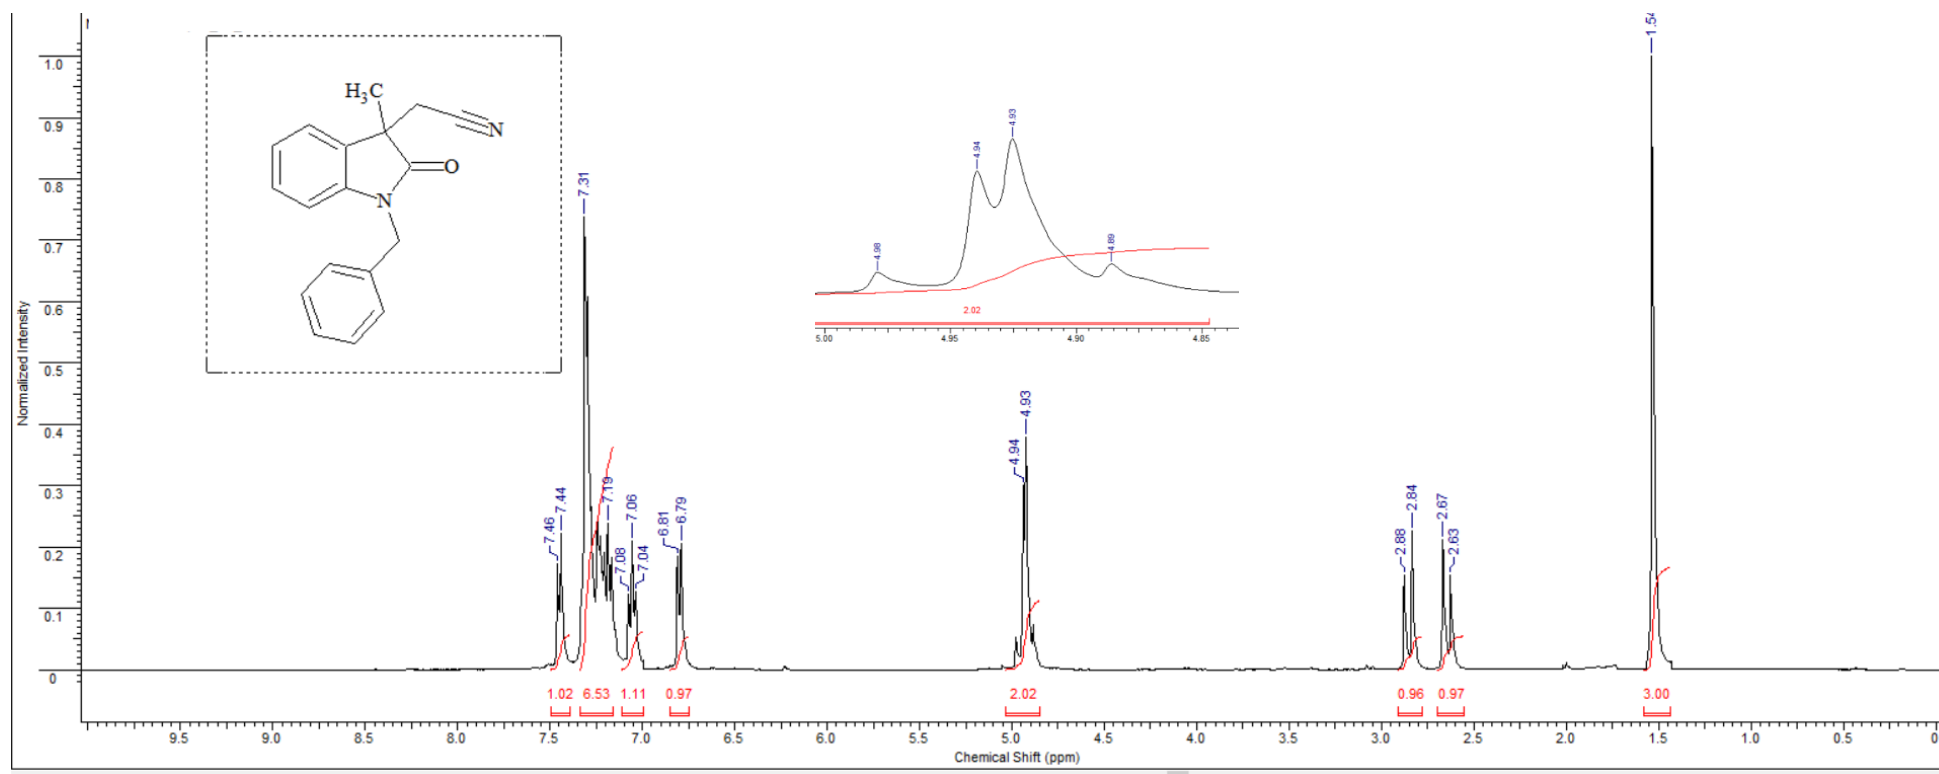

S19  $^{13}\text{C}$  NMR spectrum of 2-(1-Benzyl-3-methyl-2-oxo-2,3-dihydro-1*H*-indol-3-yl)acetonitrile (**5b**)

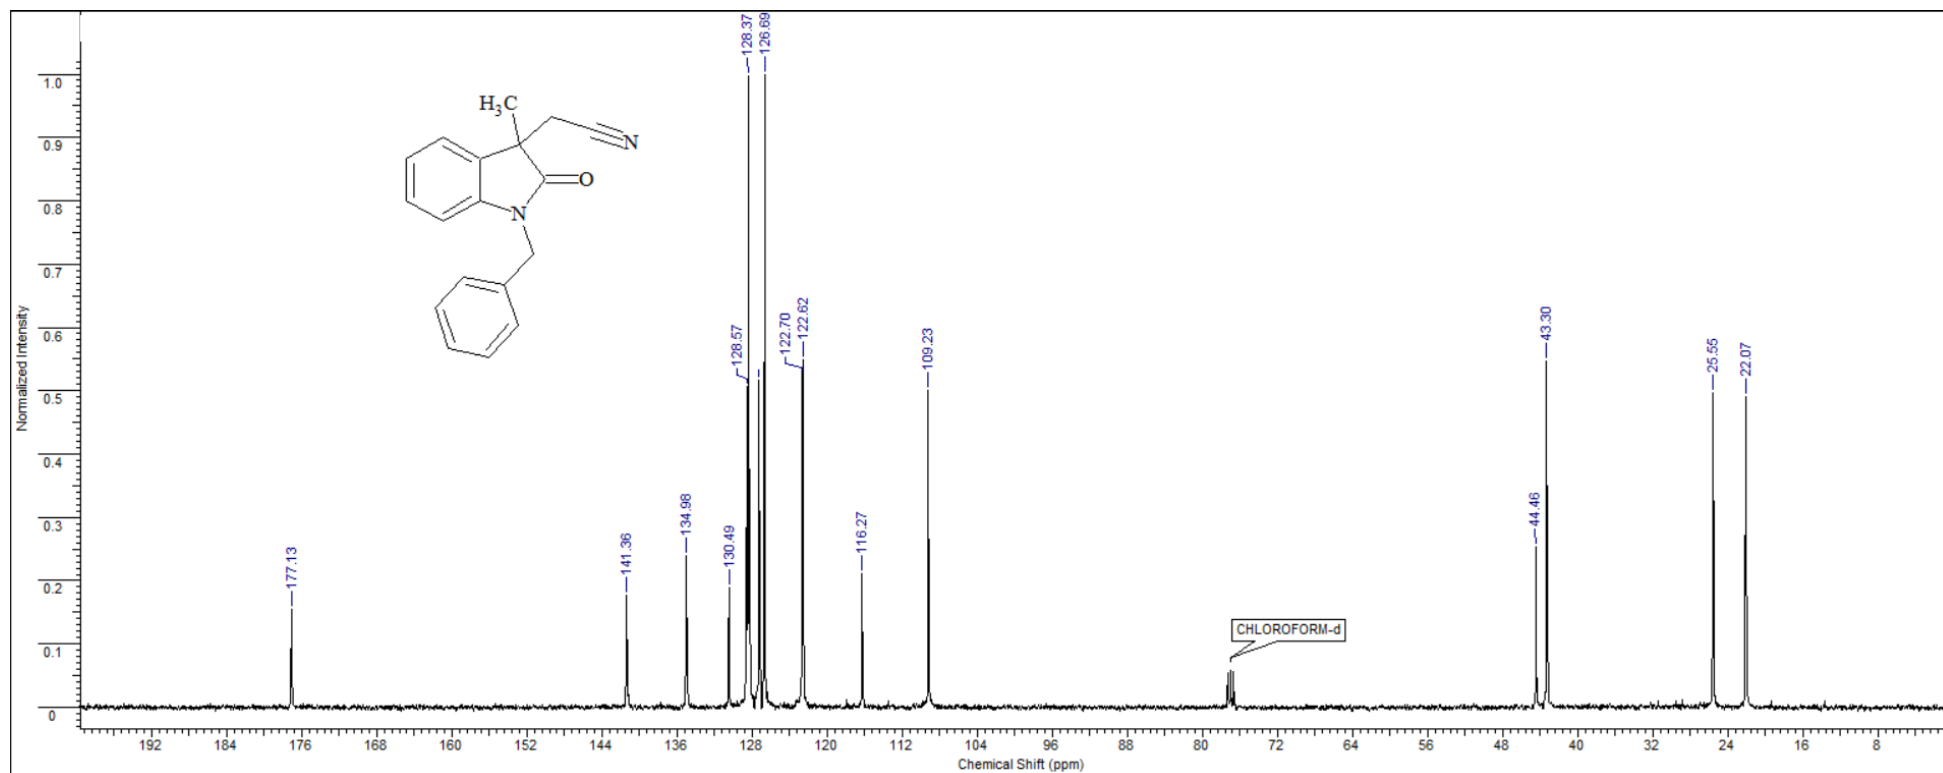

S20 <sup>1</sup>H NMR spectrum of 2-(1-Methyl-3-cyanomethyl-2-oxo-2,3-dihydro-1H-indol-3-yl)acetonitrile (**5d**)

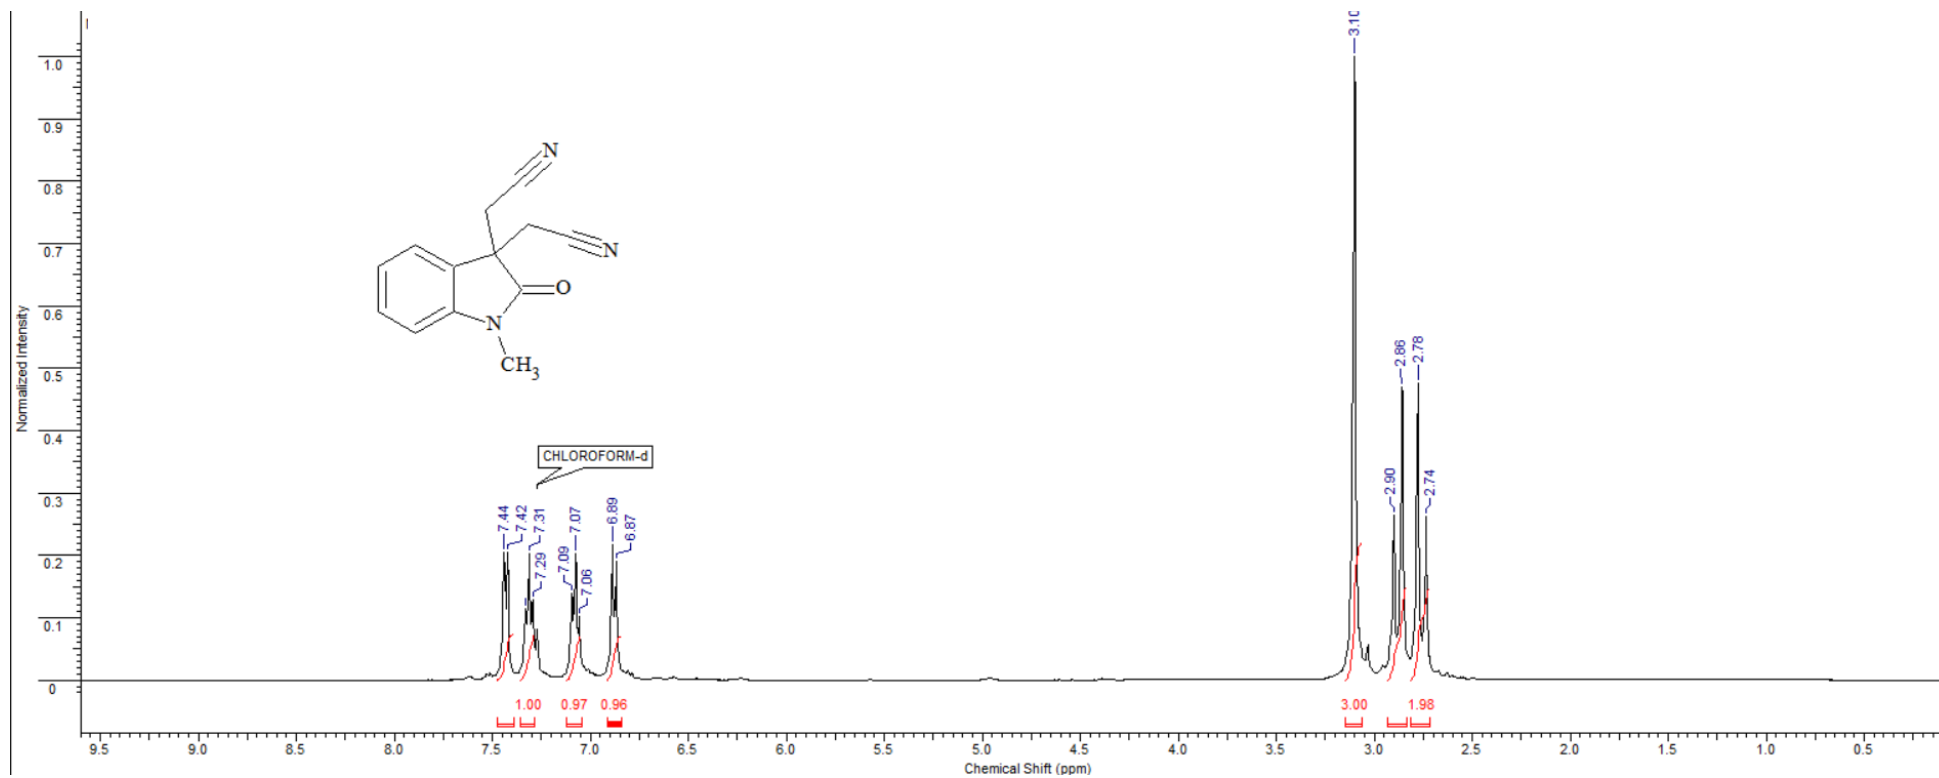

S21 <sup>13</sup>C NMR spectrum of 2-(1-Methyl-3-cyanomethyl-2-oxo-2,3-dihydro-1H-indol-3-yl)acetonitrile (**5d**)

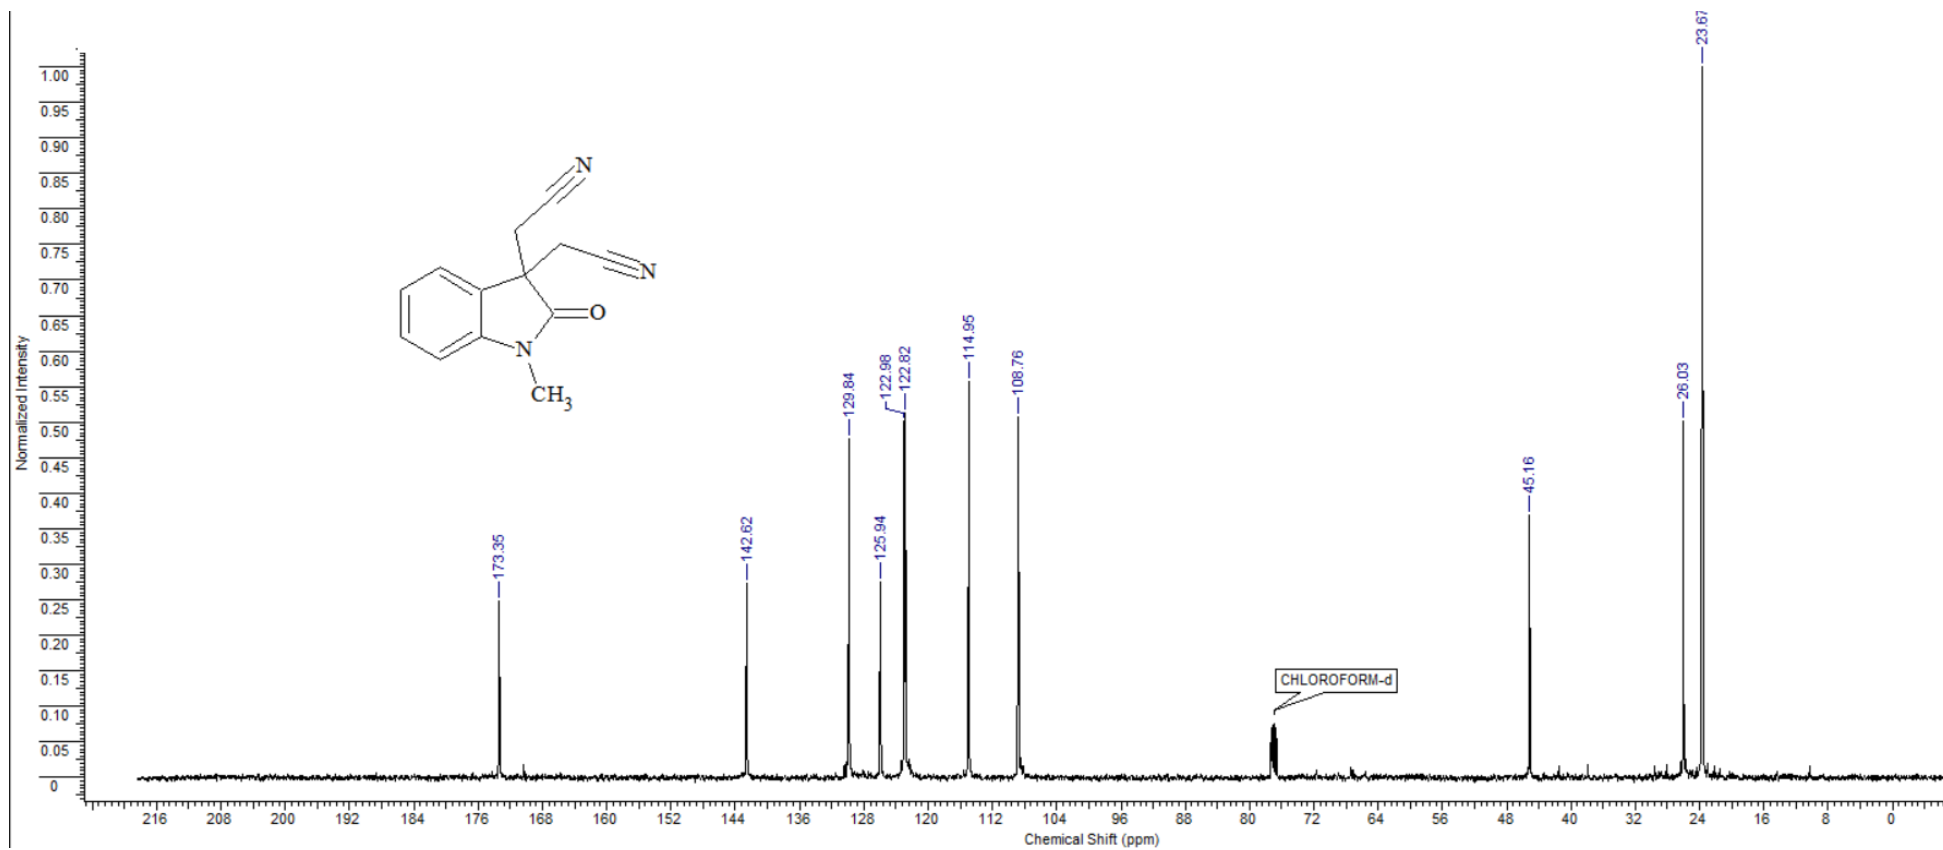

S22 <sup>1</sup>H NMR spectrum of 2-(1,3-Dimethyl-5-methoxy-2-oxo-2,3-dihydro-1H-indol-3-yl)acetonitrile (**5e**)

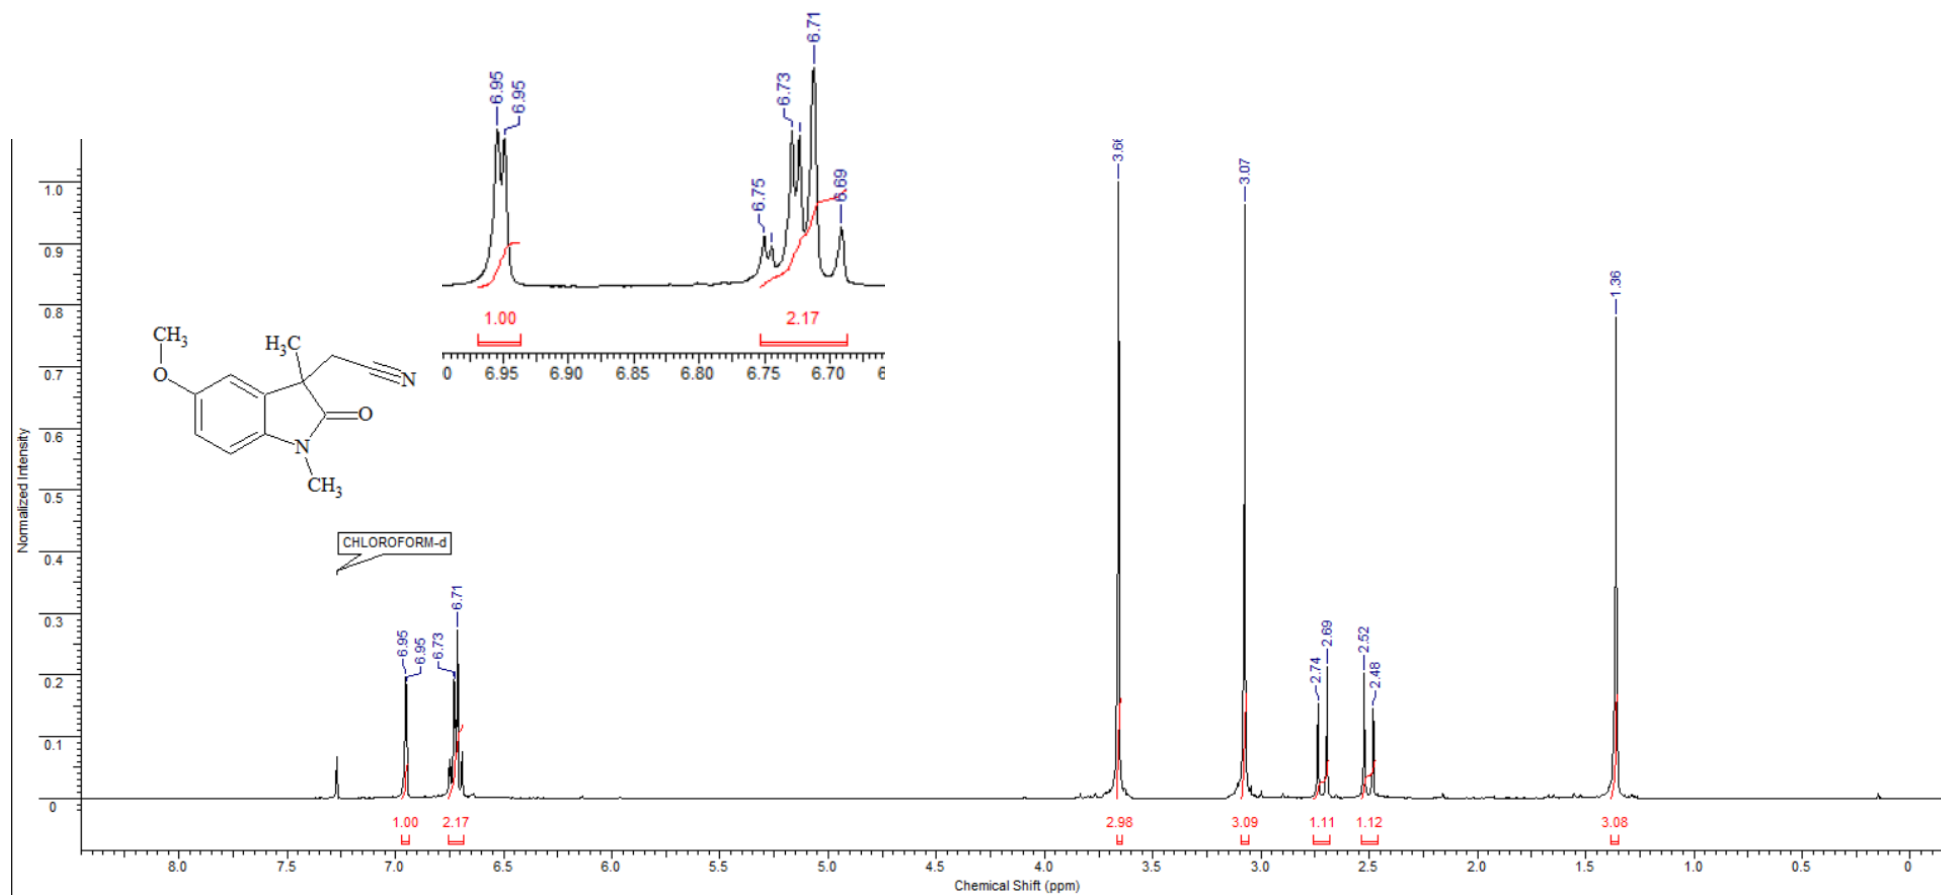

S23 <sup>13</sup>C NMR spectrum of 2-(1,3-Dimethyl-5-methoxy-2-oxo-2,3-dihydro-1H-indol-3-yl)acetonitrile (**5e**)

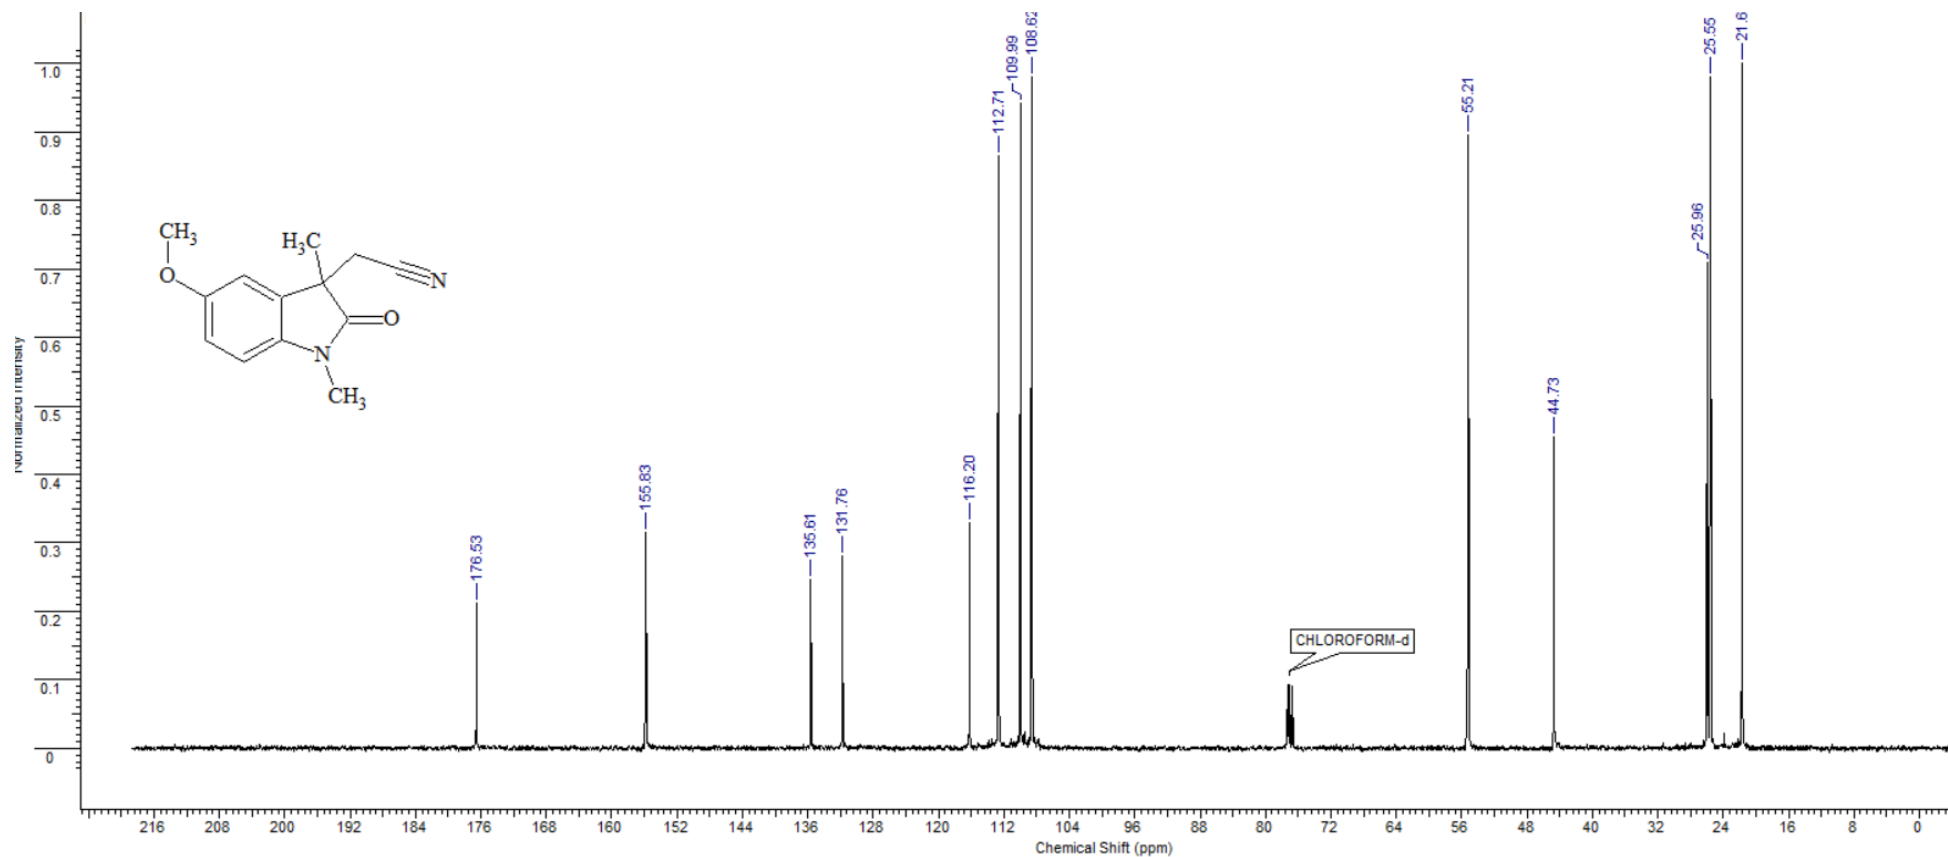

S24  $^1\text{H}$  NMR spectrum of 2-(1-Benzyl-3-methyl-5-methoxy-2-oxo-2,3-dihydro-1*H*-indol-3-yl)acetonitrile (**5f**)

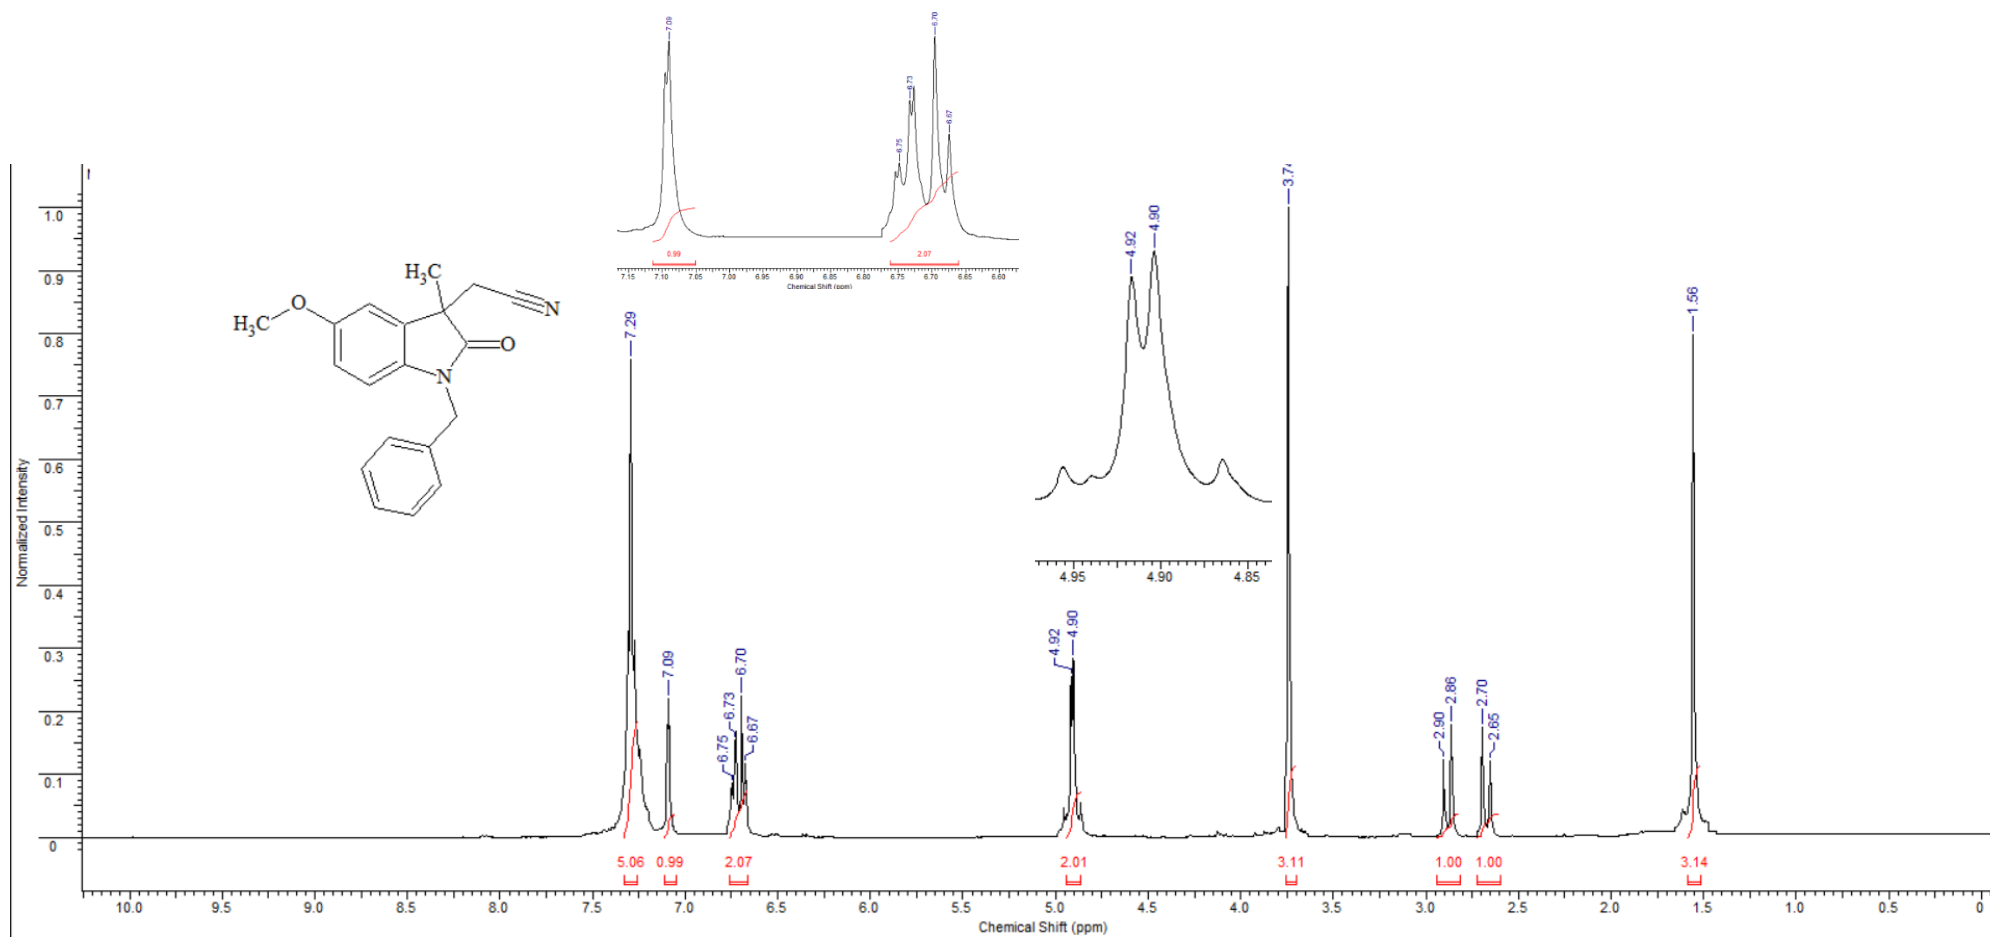

S25  $^{13}\text{C}$  NMR spectrum of 2-(1-Benzyl-3-methyl-5-methoxy-2-oxo-2,3-dihydro-1*H*-indol-3-yl)acetonitrile (**5f**)

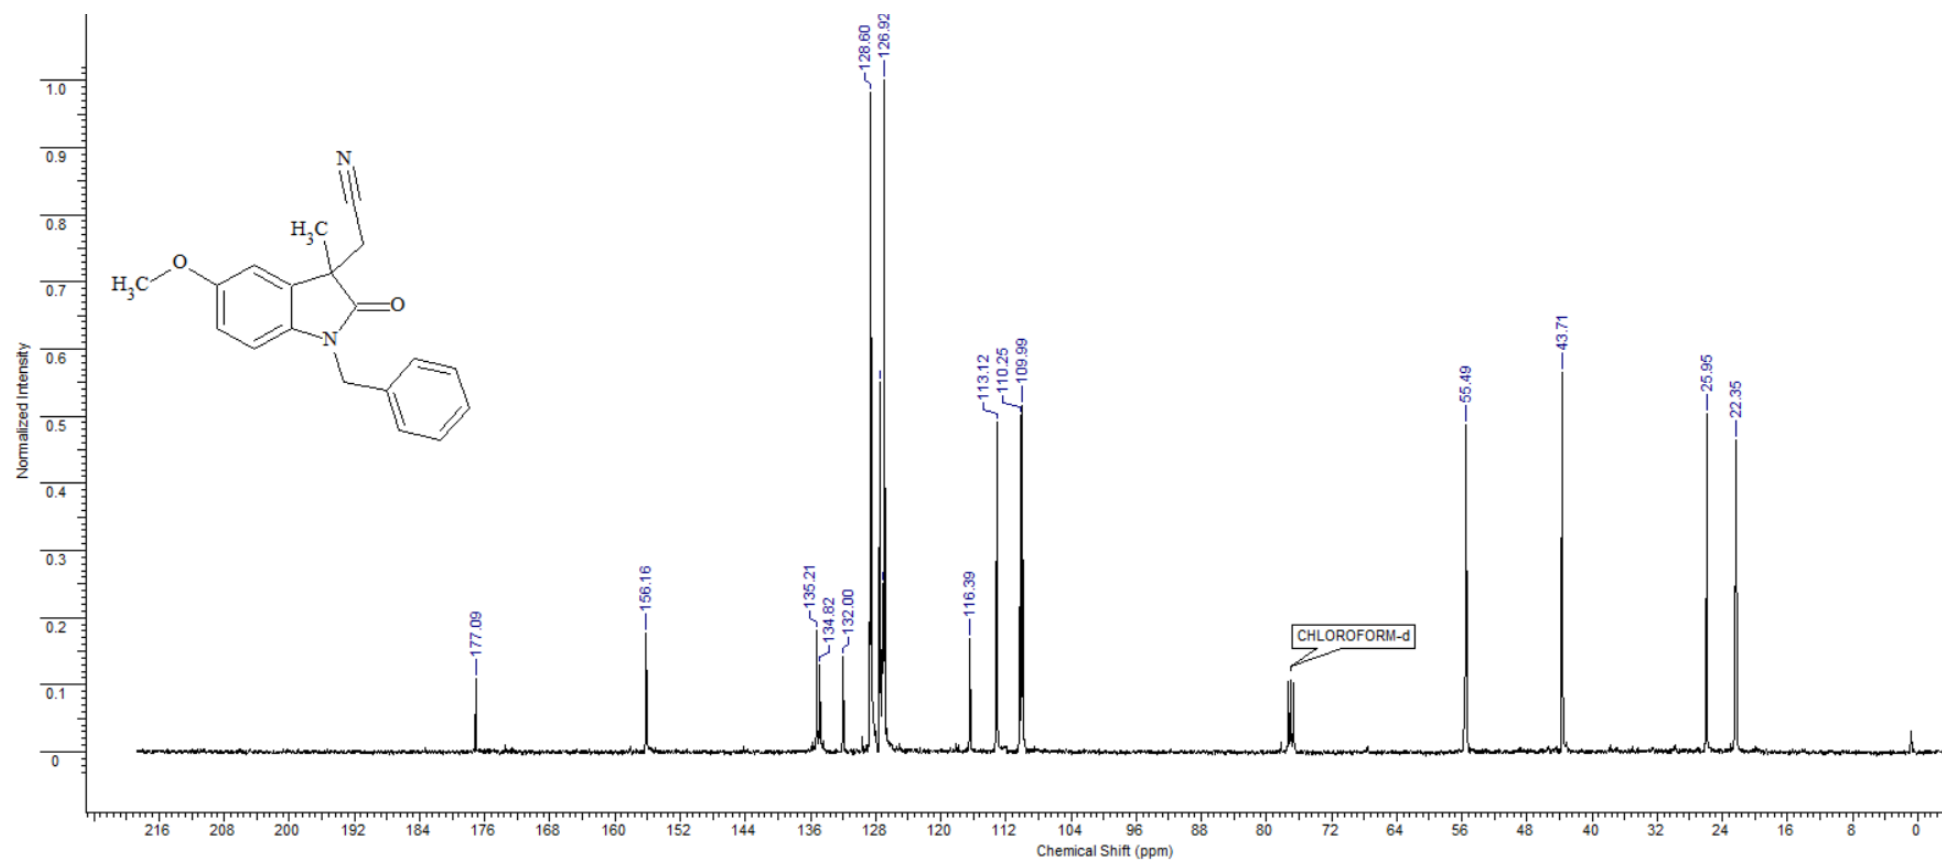

S26  $^1\text{H}$  NMR spectrum of 2-(3-Ethyl-1-methyl-5-methoxy-2-oxo-2,3-dihydro-1H-indol-3-yl)acetonitrile (**5g**)

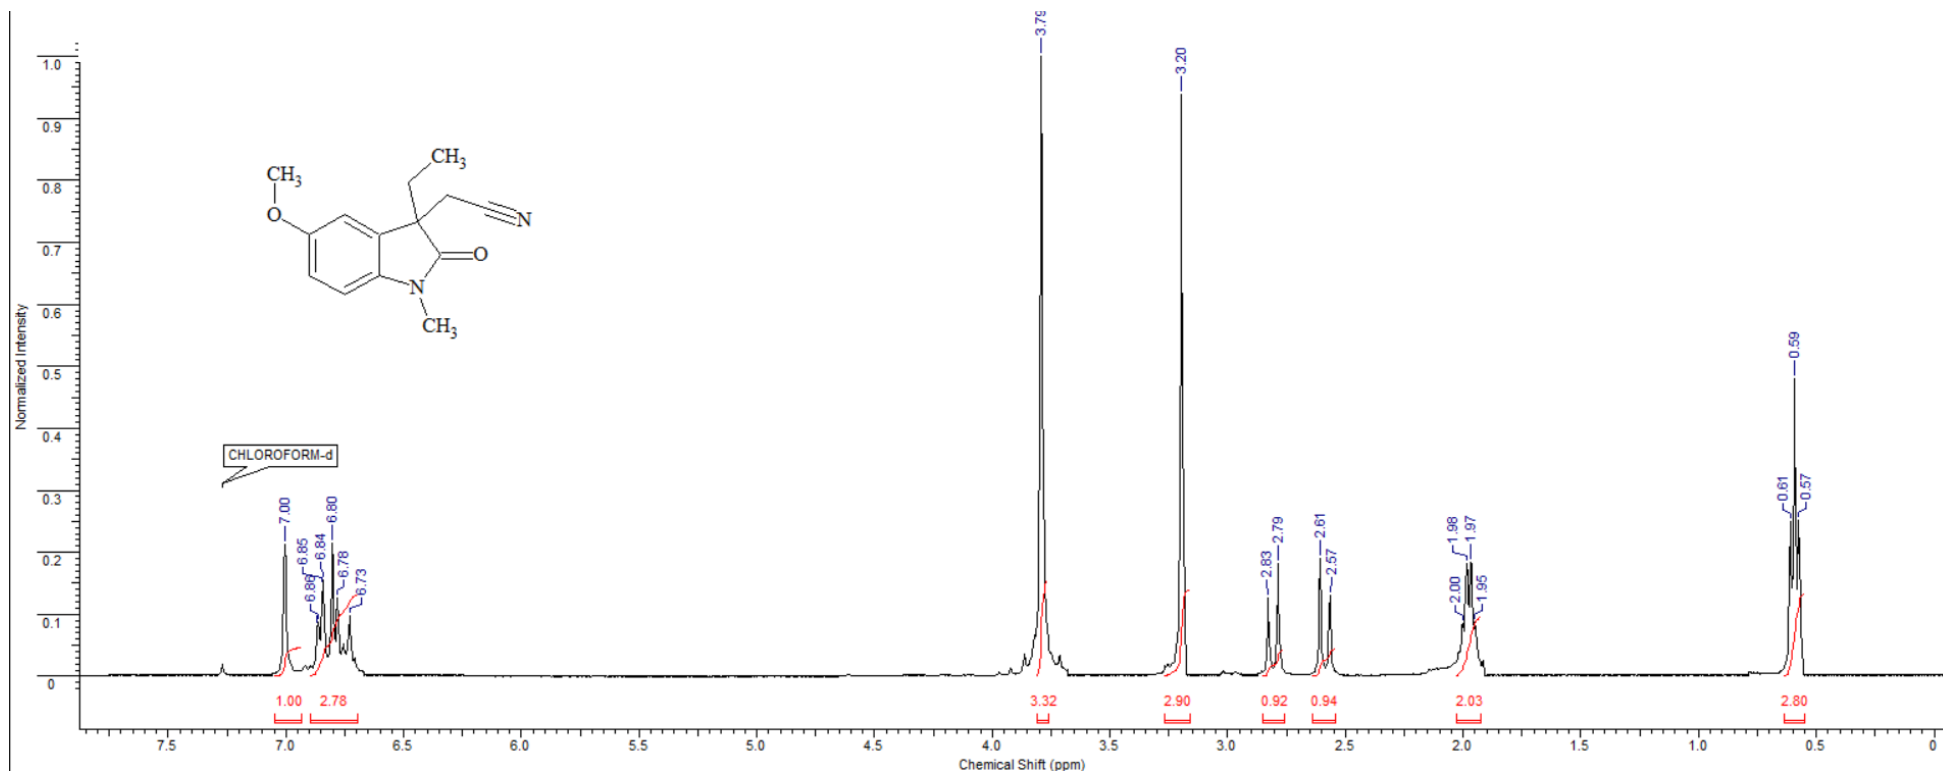

S27 <sup>13</sup>C NMR spectrum of 2-(3-Ethyl-1-methyl-5-methoxy-2-oxo-2,3-dihydro-1H-indol-3-yl)acetonitrile (**5g**)

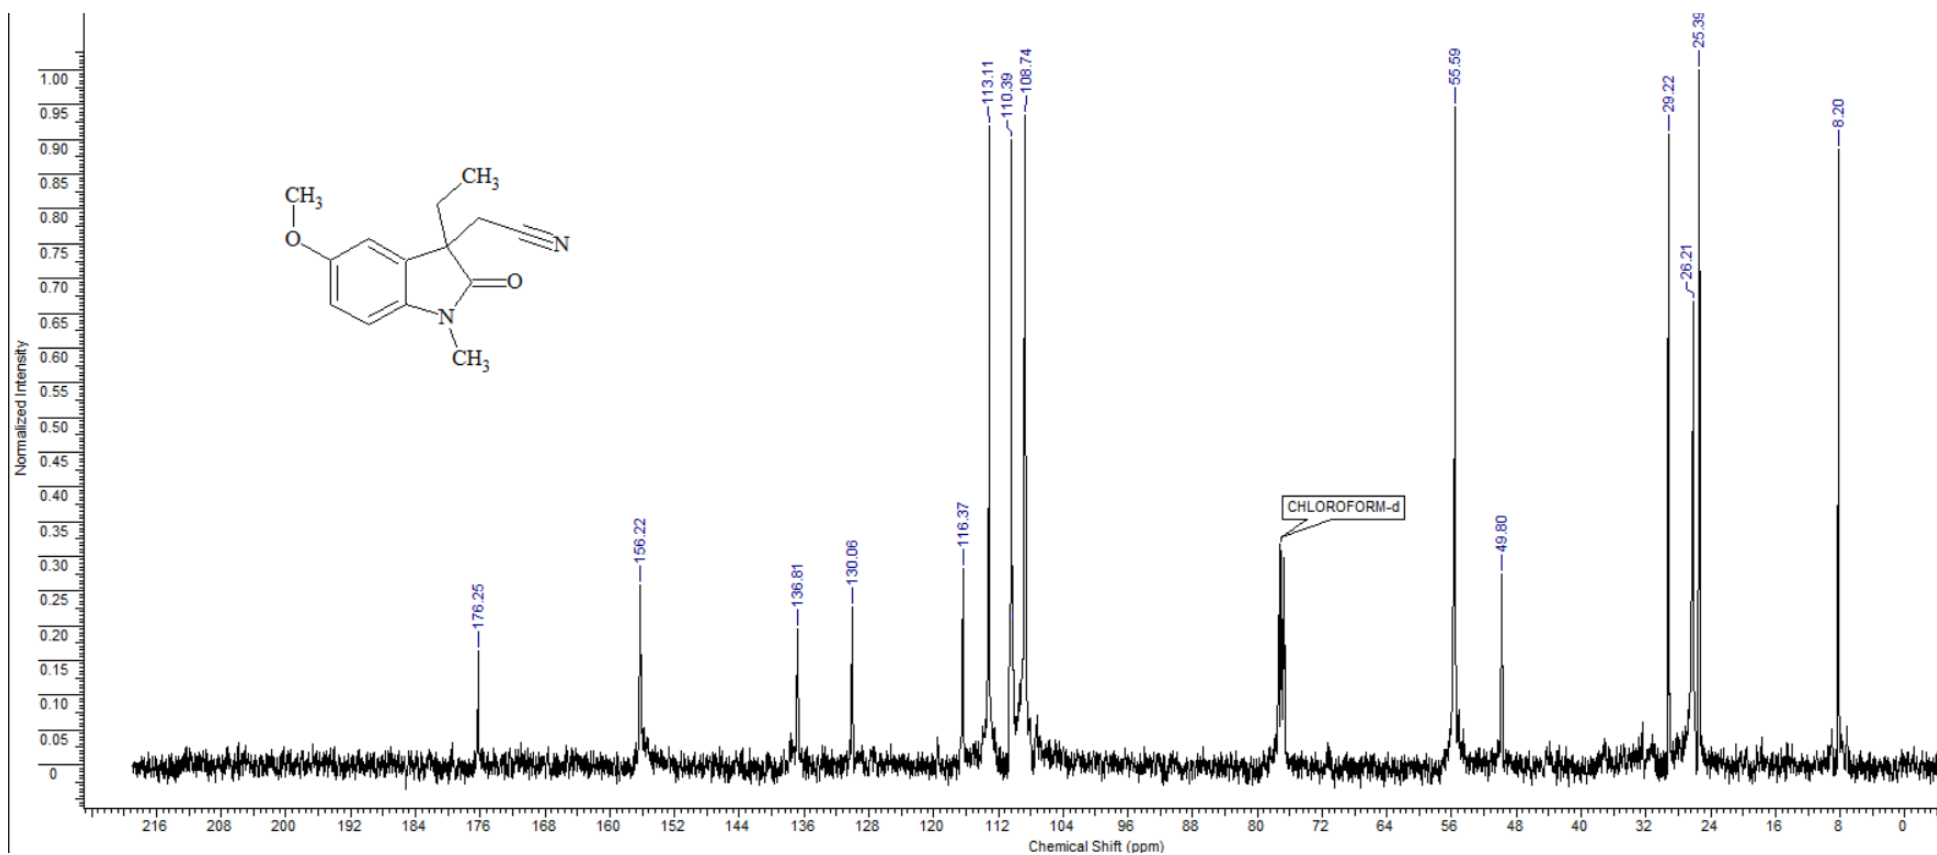

S28  $^1\text{H}$  NMR spectrum of 2-(1-Methyl-5-methoxy-3-(cyanomethyl)-2-oxo-2,3-dihydro-1H-indol-3-yl)acetonitrile (**5h**)

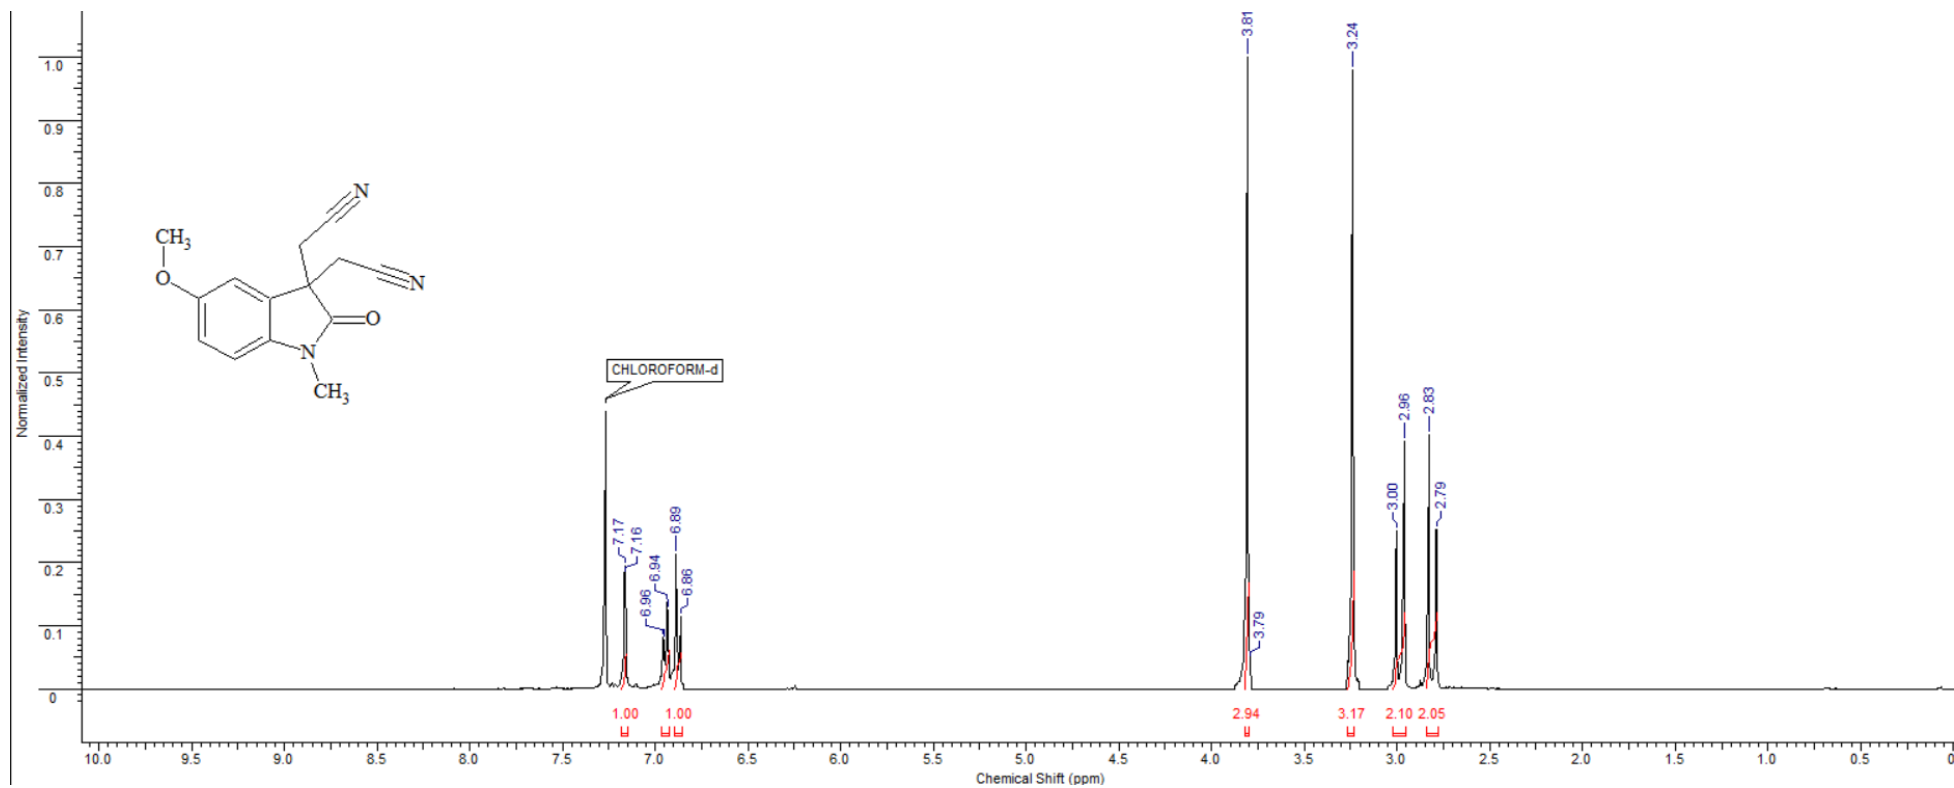

S29  $^{13}\text{C}$  NMR spectrum of 2-(1-Methyl-5-methoxy-3-(cyanomethyl)-2-oxo-2,3-dihydro-1H-indol-3-yl)acetonitrile (**5h**)

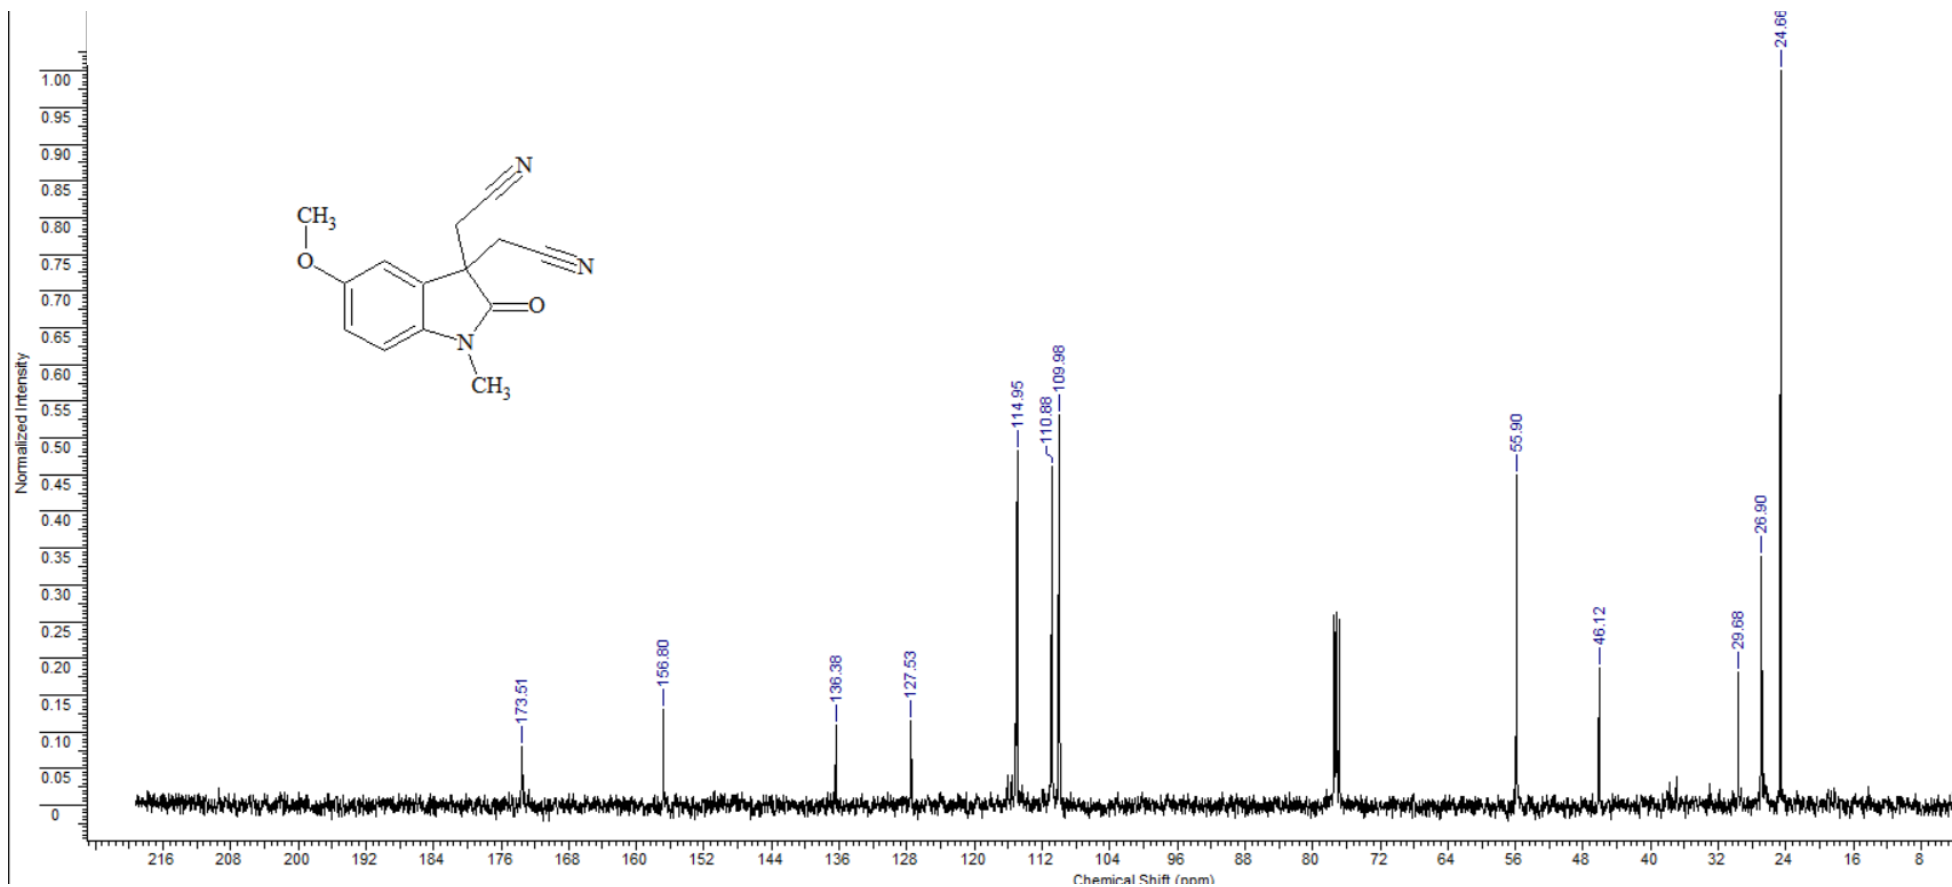

S30 <sup>1</sup>H NMR spectrum of 2-(5-Bromo-1,3-dimethyl-2-oxo-2,3-dihydro-1H-indol-3-yl)acetonitrile (**5j**)

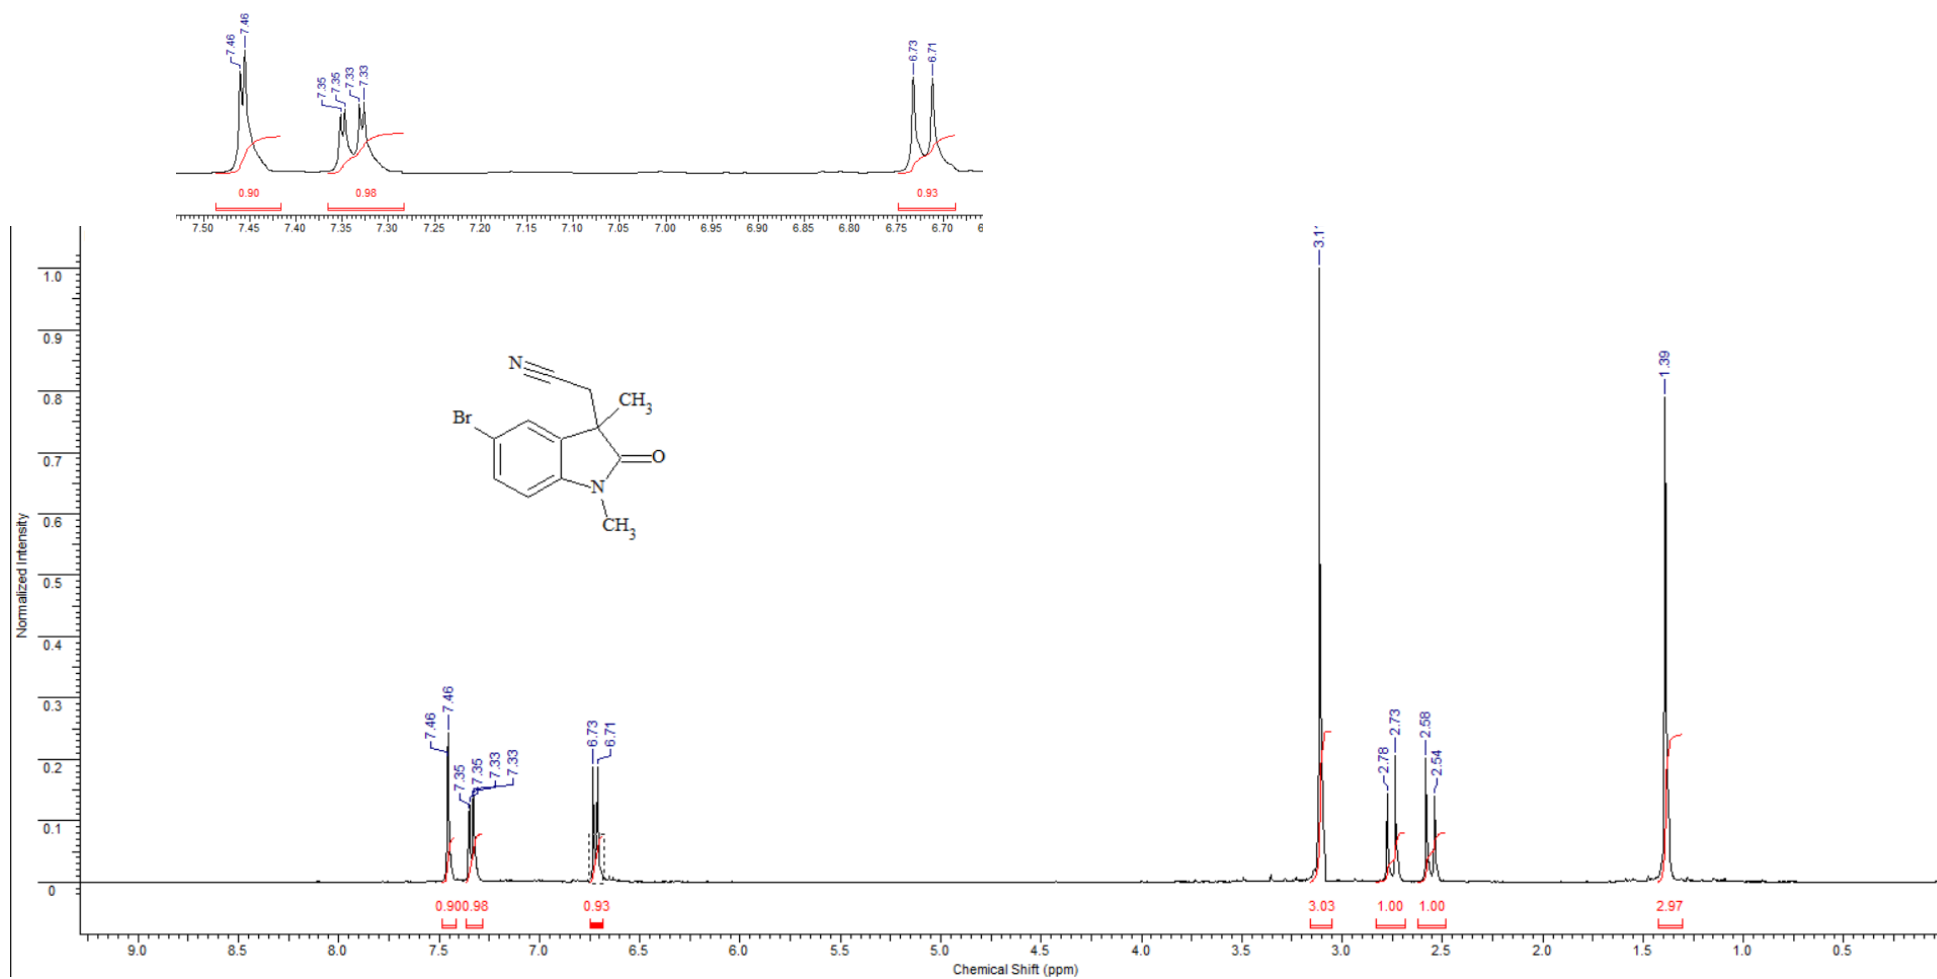

S31 <sup>13</sup>C NMR spectrum of 2-(5-Bromo-1,3-dimethyl-2-oxo-2,3-dihydro-1H-indol-3-yl)acetonitrile (**5j**)

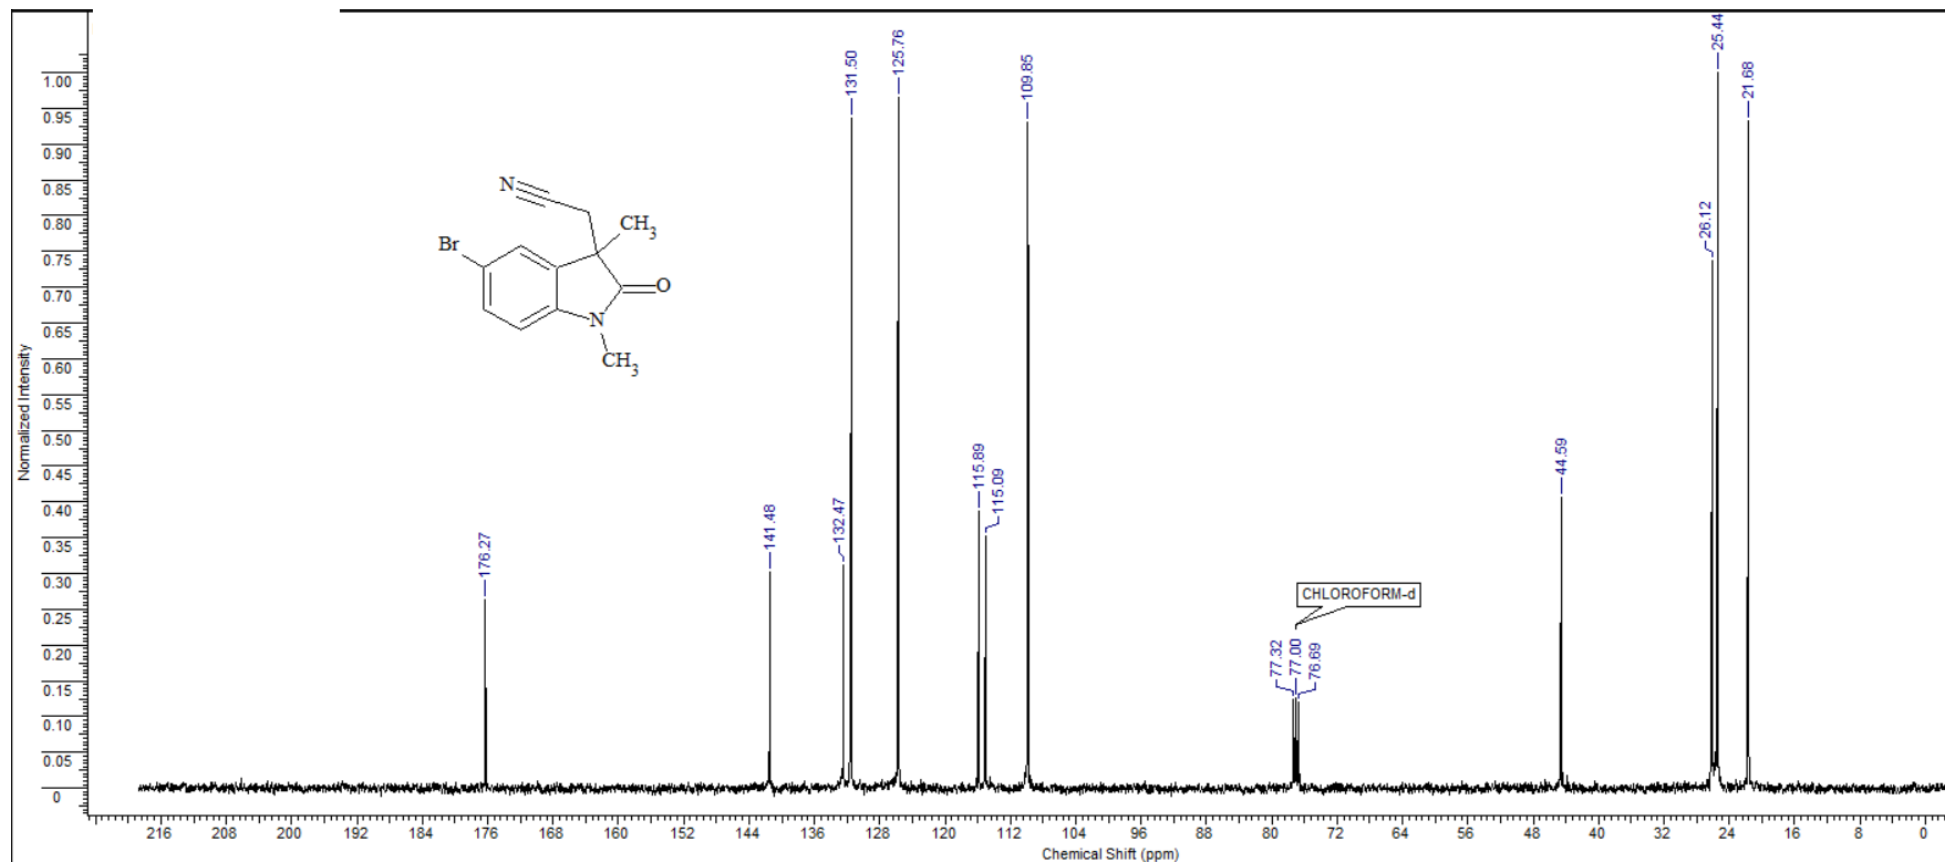

S32  $^1\text{H}$  NMR spectrum of 2-(1,3,6,7-Tetramethyl-2-oxo-2,3-dihydro-1*H*-indol-3-yl)acetonitrile (**5k**)

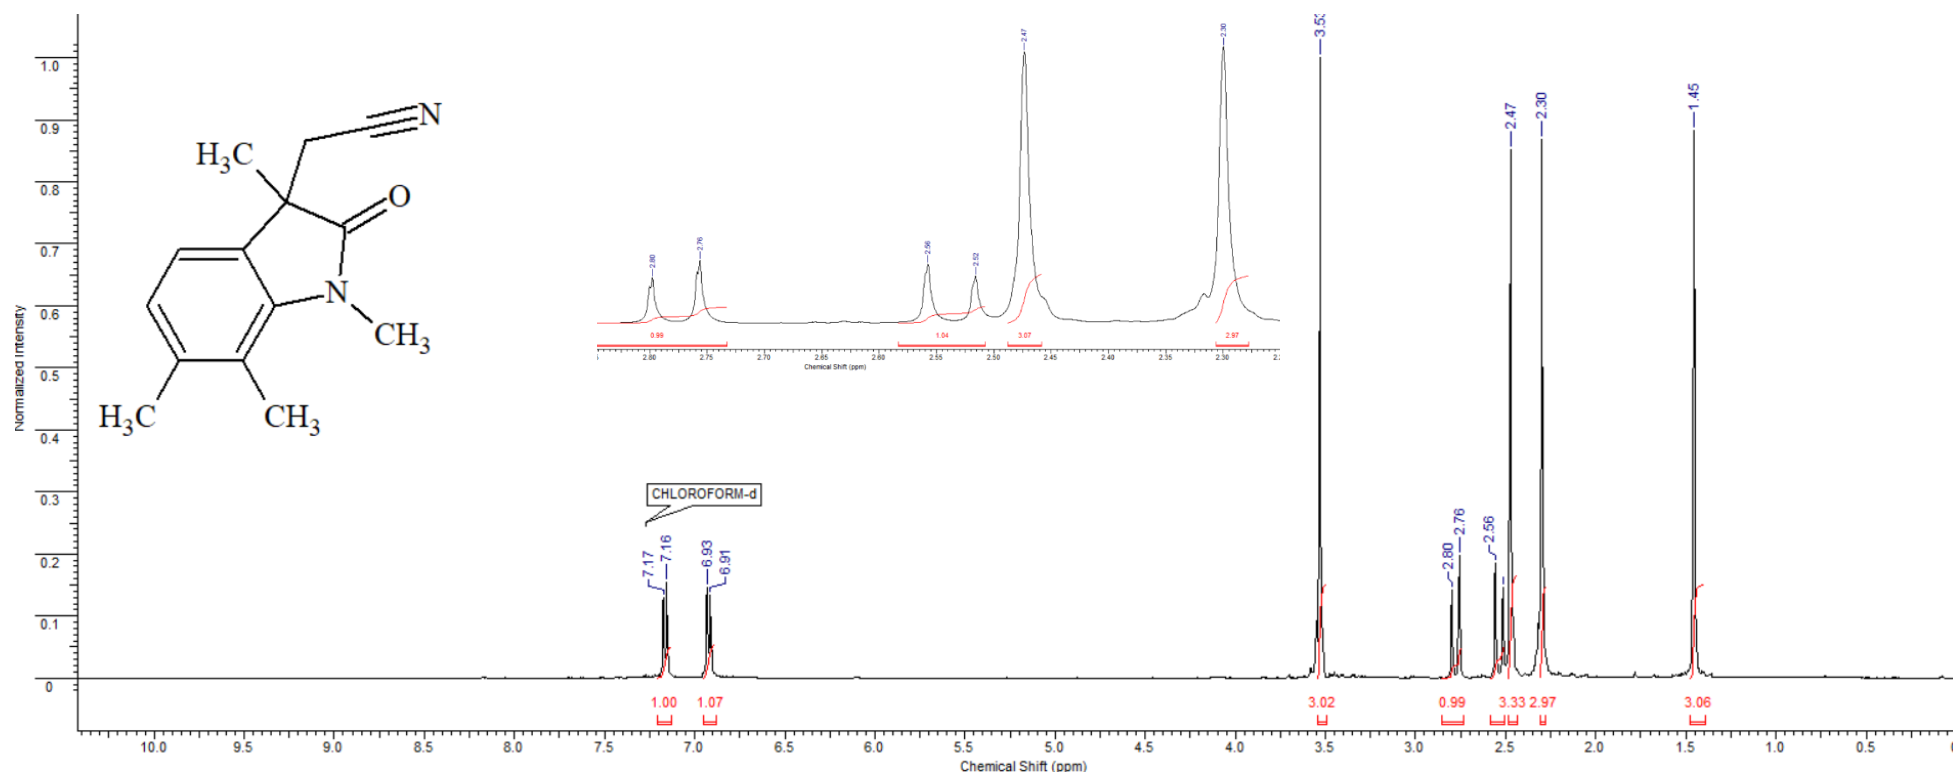

S33 <sup>1</sup>H NMR spectrum of Tert-butyl 3-(cyanomethyl)-3-methyl-2-oxo-2,3-dihydro-1*H*-indole-1-carboxylate (**51**)

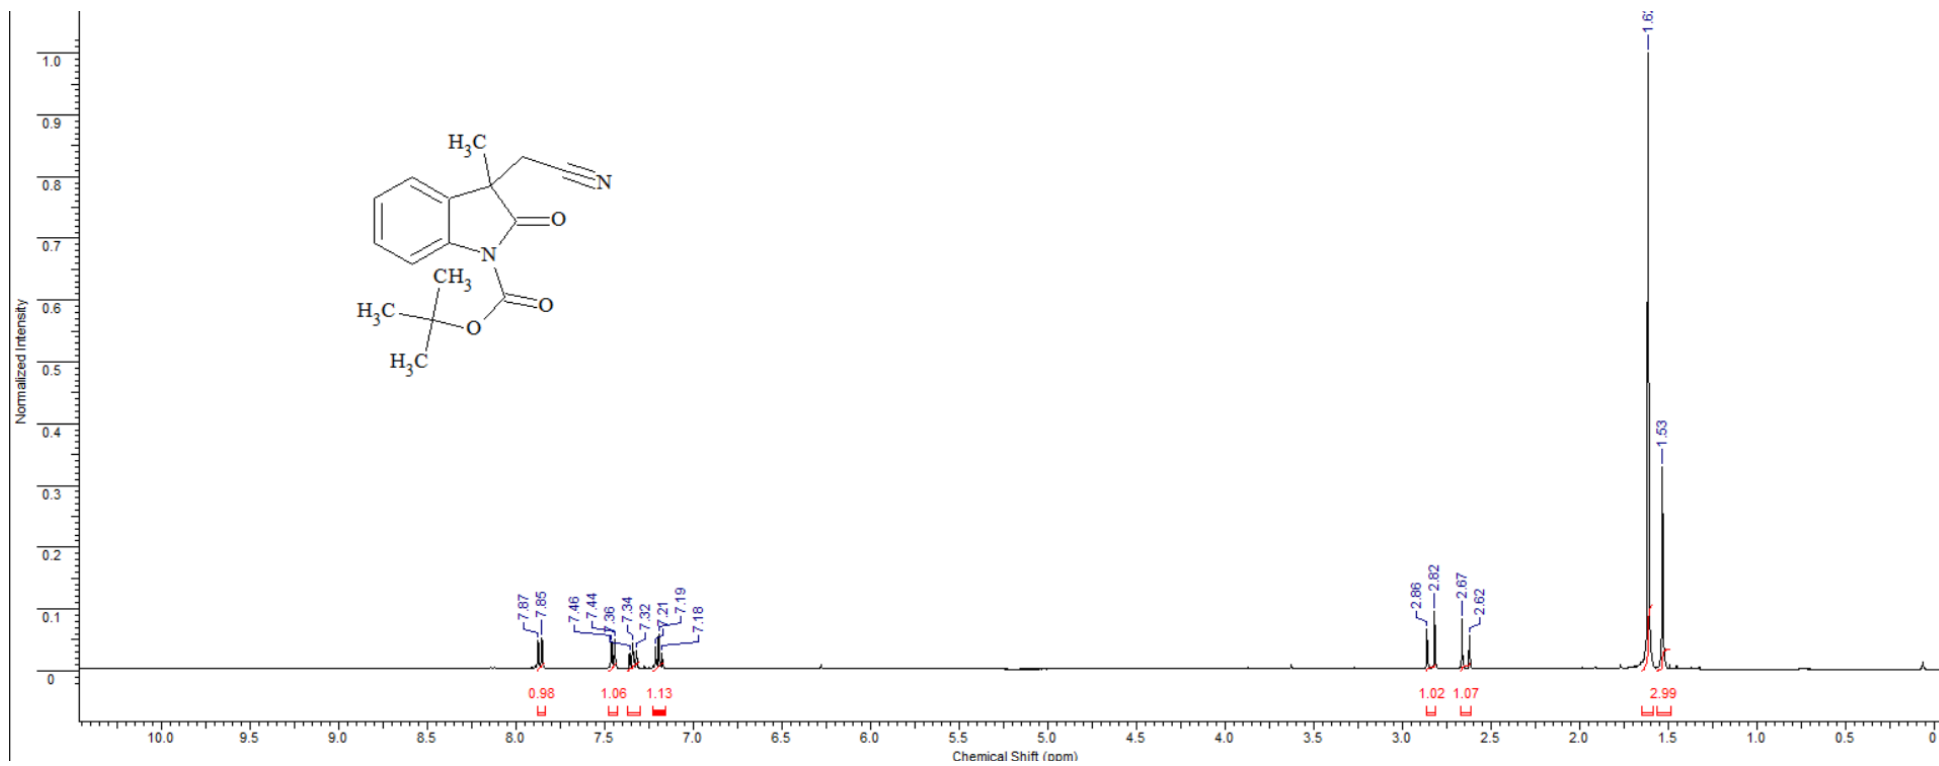

S34  $^{13}\text{C}$  NMR spectrum of Tert-butyl 3-(cyanomethyl)-3-methyl-2-oxo-2,3-dihydro-1*H*-indole-1-carboxylate (**51**)

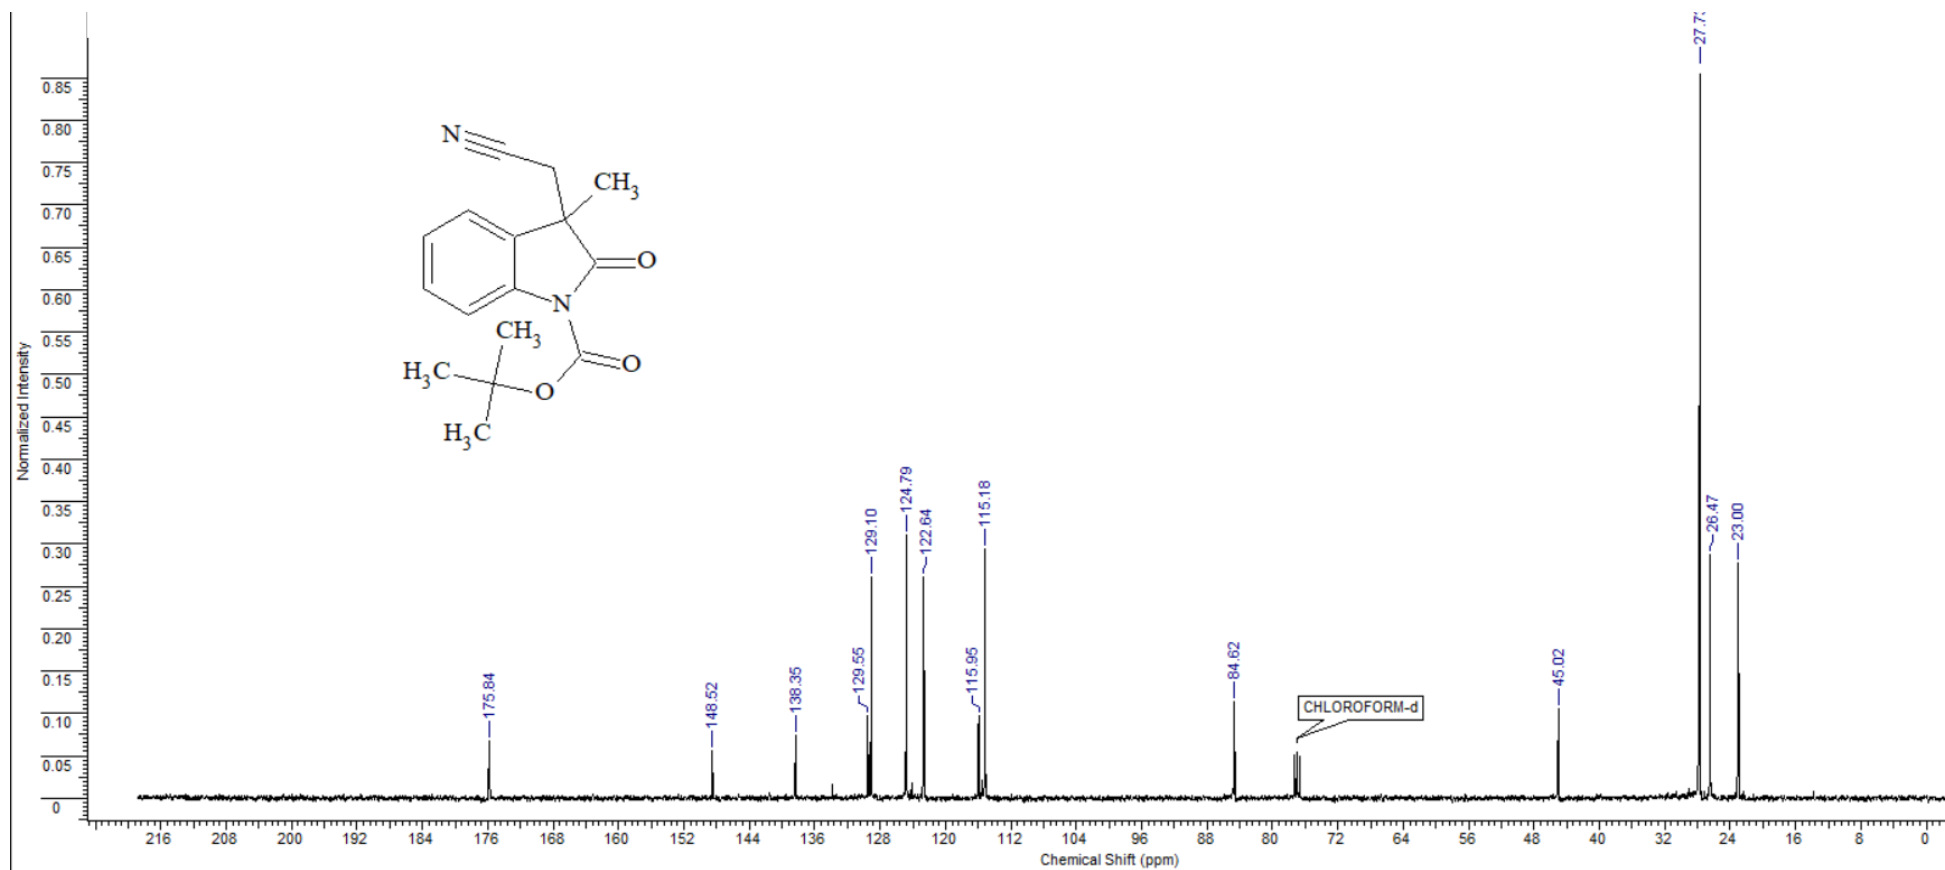

S35  $^1\text{H}$  NMR spectrum of (1R\*,2R\*)-6',7'-Dimethyl-2'-oxo-1',2'-dihydrospiro[cyclopropane-1,3'-indole]-3-carbonitrile (6d)

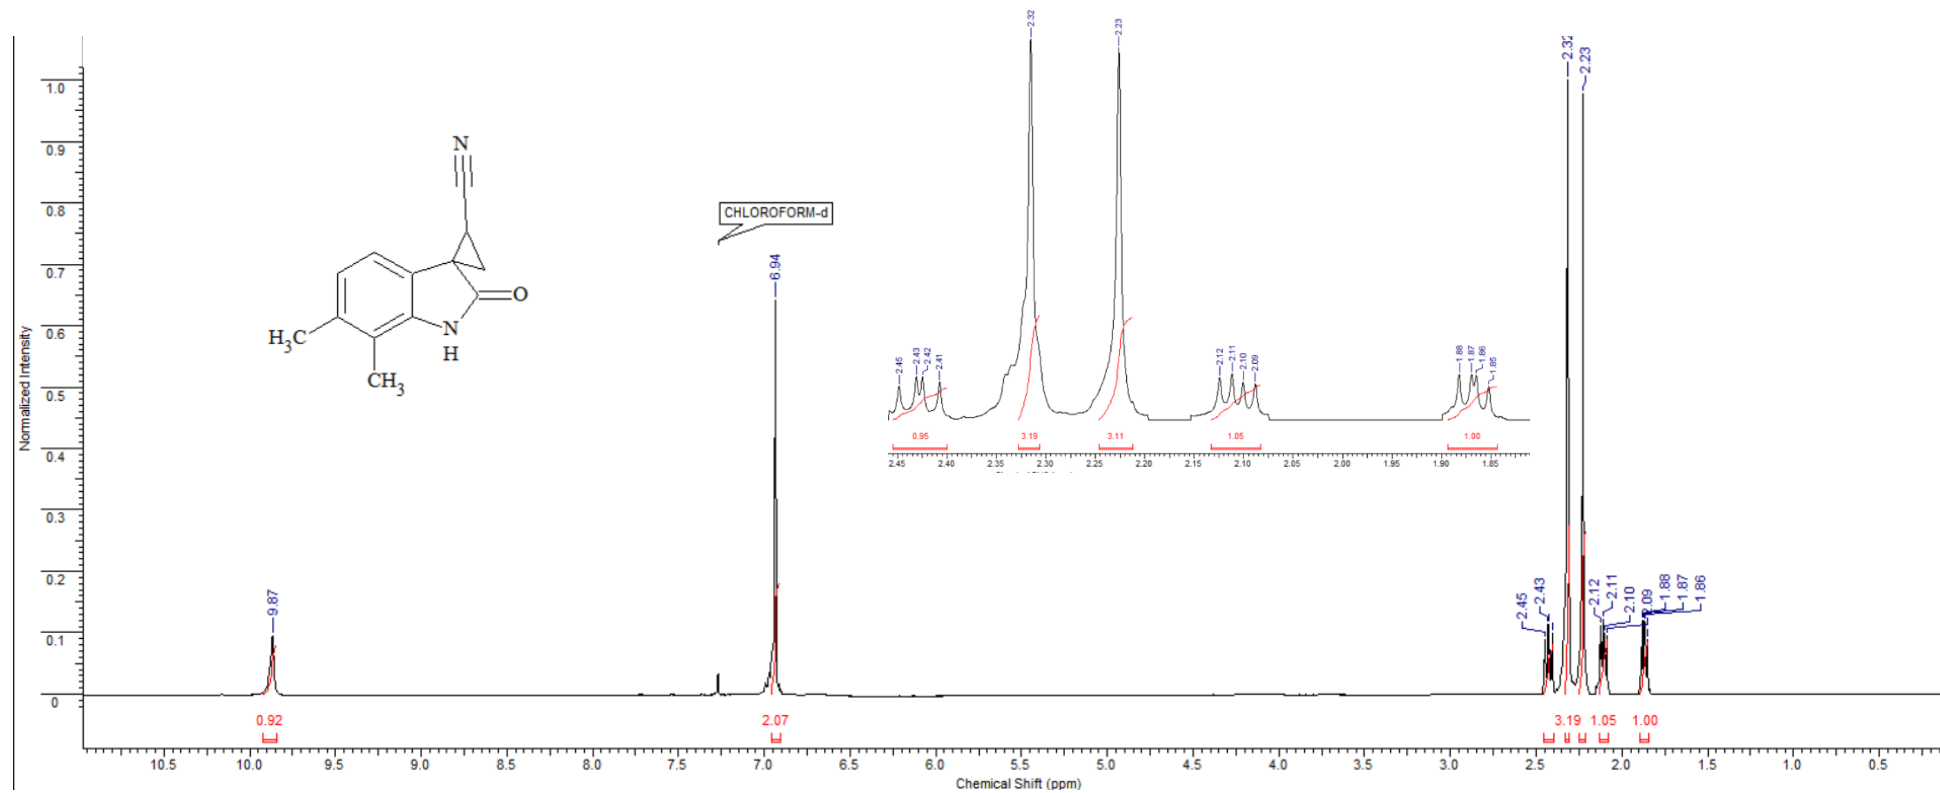

S36  $^{13}\text{C}$  NMR spectrum of (1R\*,2R\*)-6',7'-Dimethyl-2'-oxo-1',2'-dihydrospiro[cyclopropane-1,3'-indole]-3-carbonitrile (**6d**)

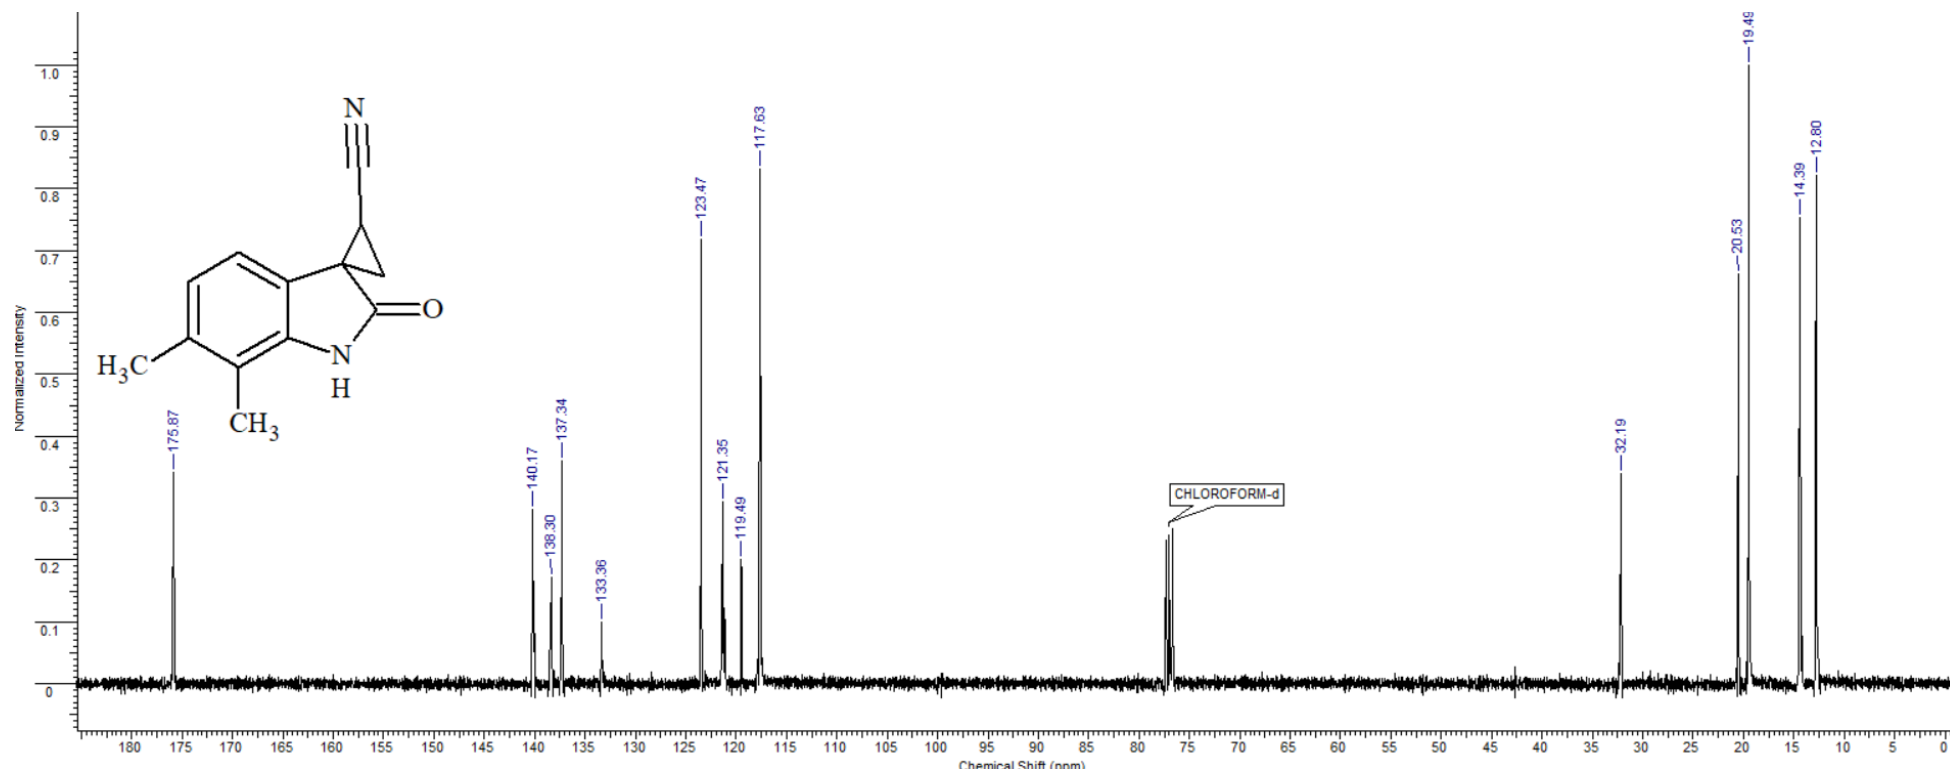

S37  $^1\text{H}$  NMR spectrum of 1'-Methyl-5'-methoxy-2'-oxo-1',2'-dihydrospiro[cyclopropane-1,3'-indole]-3-carbonitrile (**6g**) (mixture of isomers)

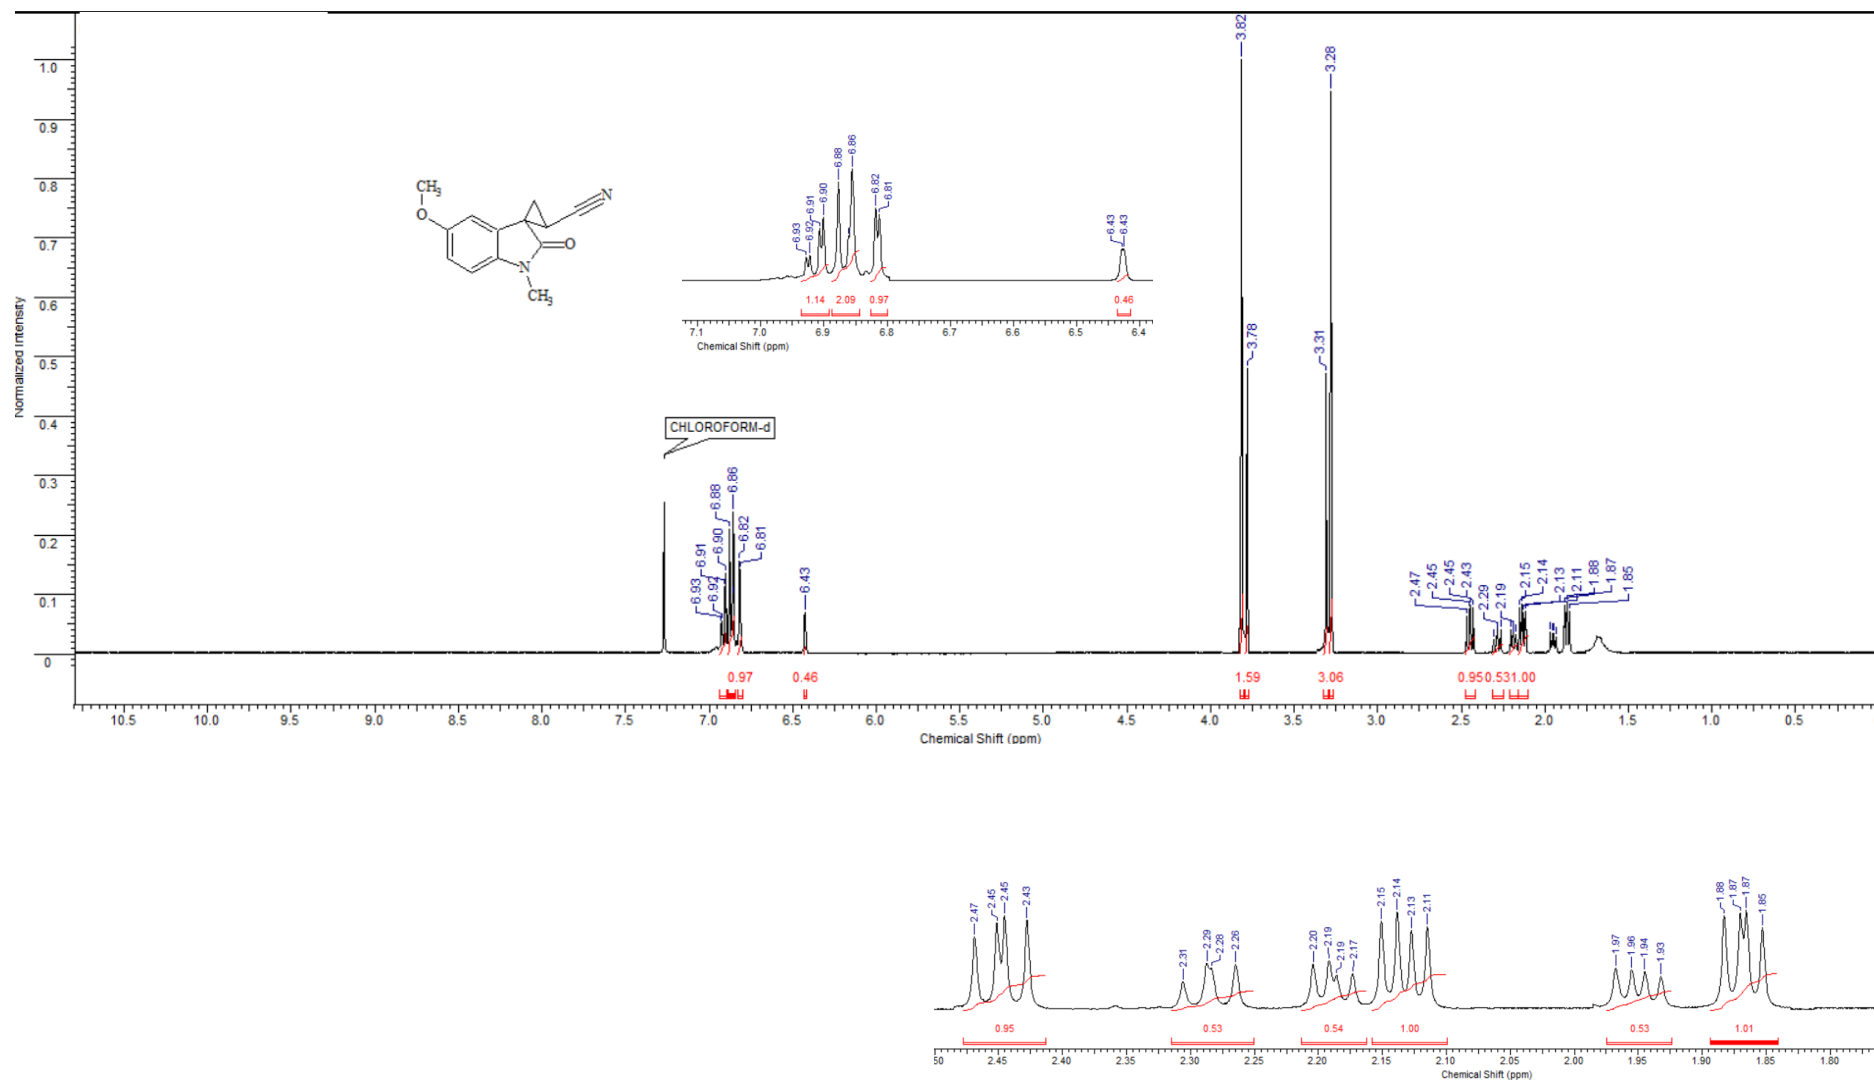

S38  $^{13}\text{C}$  NMR spectrum of 1'-Methyl-5'-methoxy-2'-oxo-1',2'-dihydrospiro[cyclopropane-1,3'-indole]-3-carbonitrile (**6g**) (single isomers)

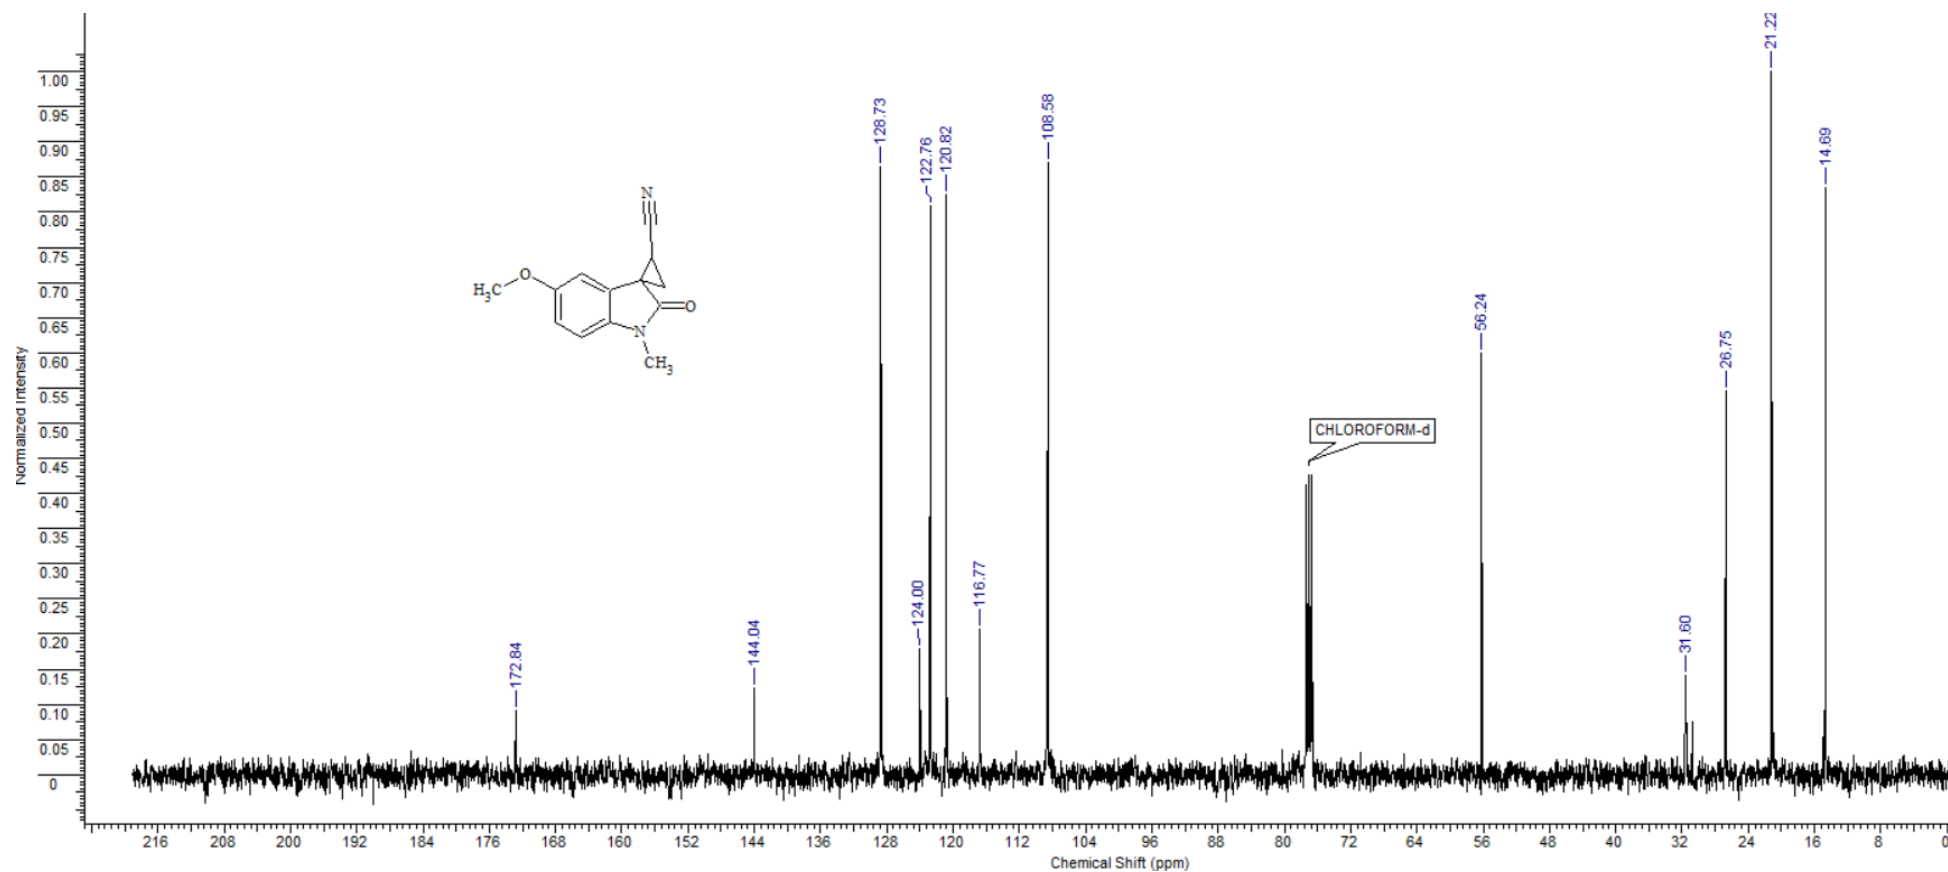

S39  $^1\text{H}$  NMR spectrum of 5'-Bromo-1-methyl-2'-oxo-1',2'-dihydrospiro[cyclopropane-1,3'-indole]-3-carbonitrile (**6i**)

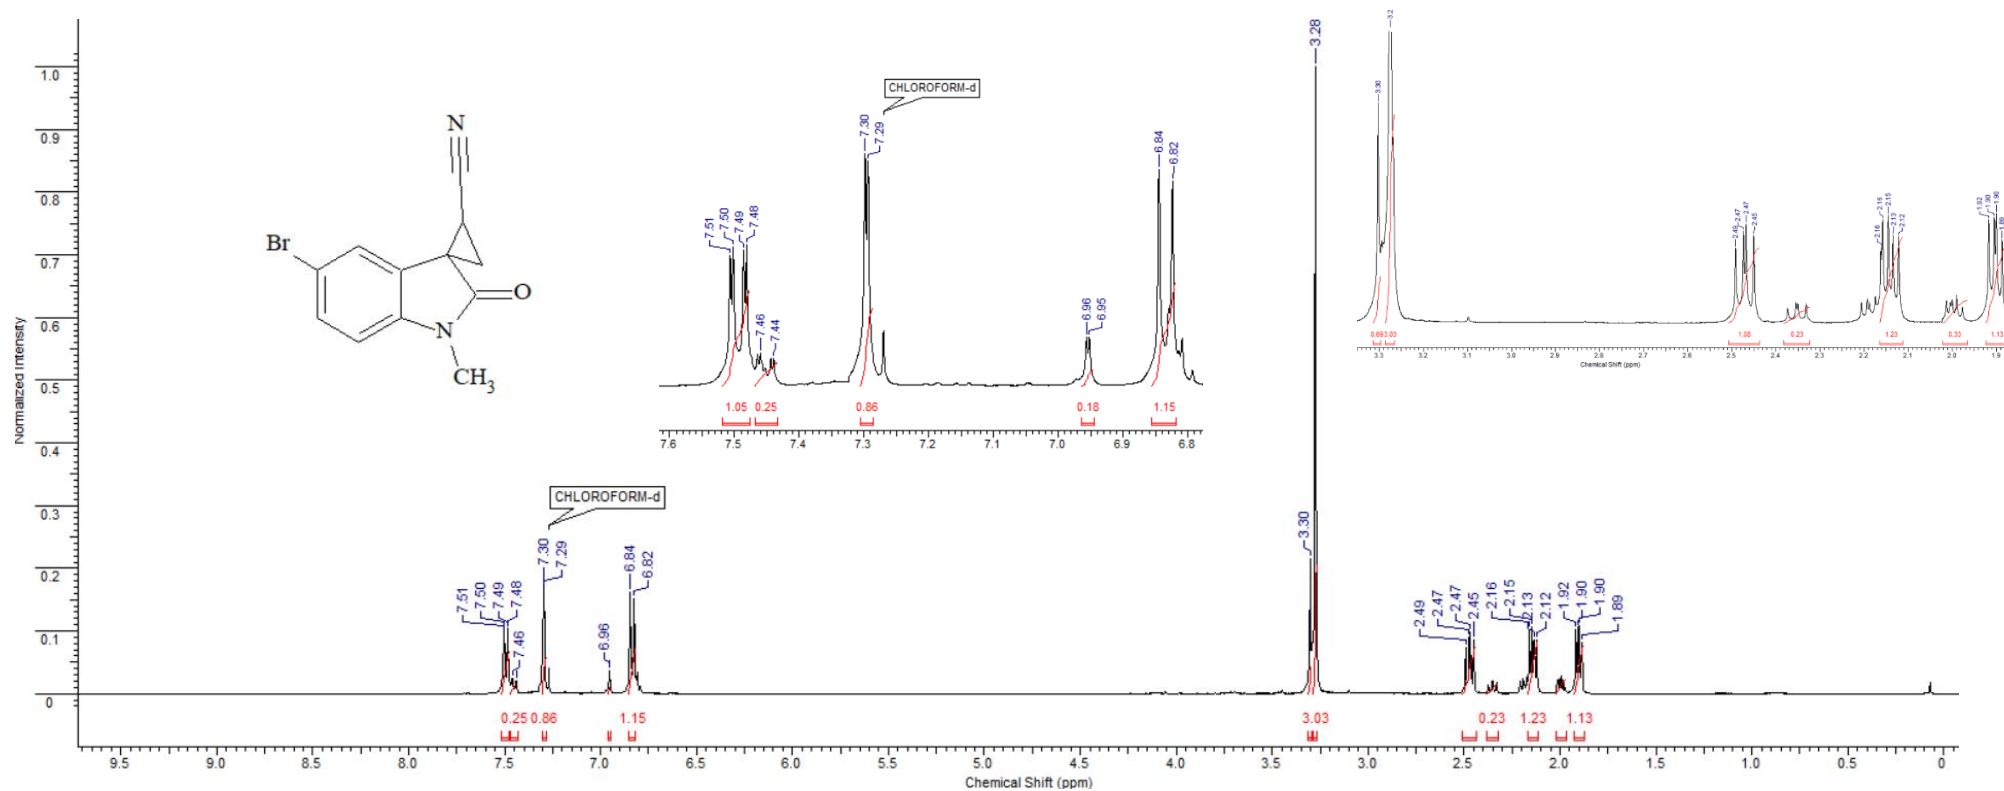

S40 <sup>13</sup>C NMR spectrum of 5'-Bromo-1-methyl-2'-oxo-1',2'-dihydrospiro[cyclopropane-1,3'-indole]-3-carbonitrile (**6i**)

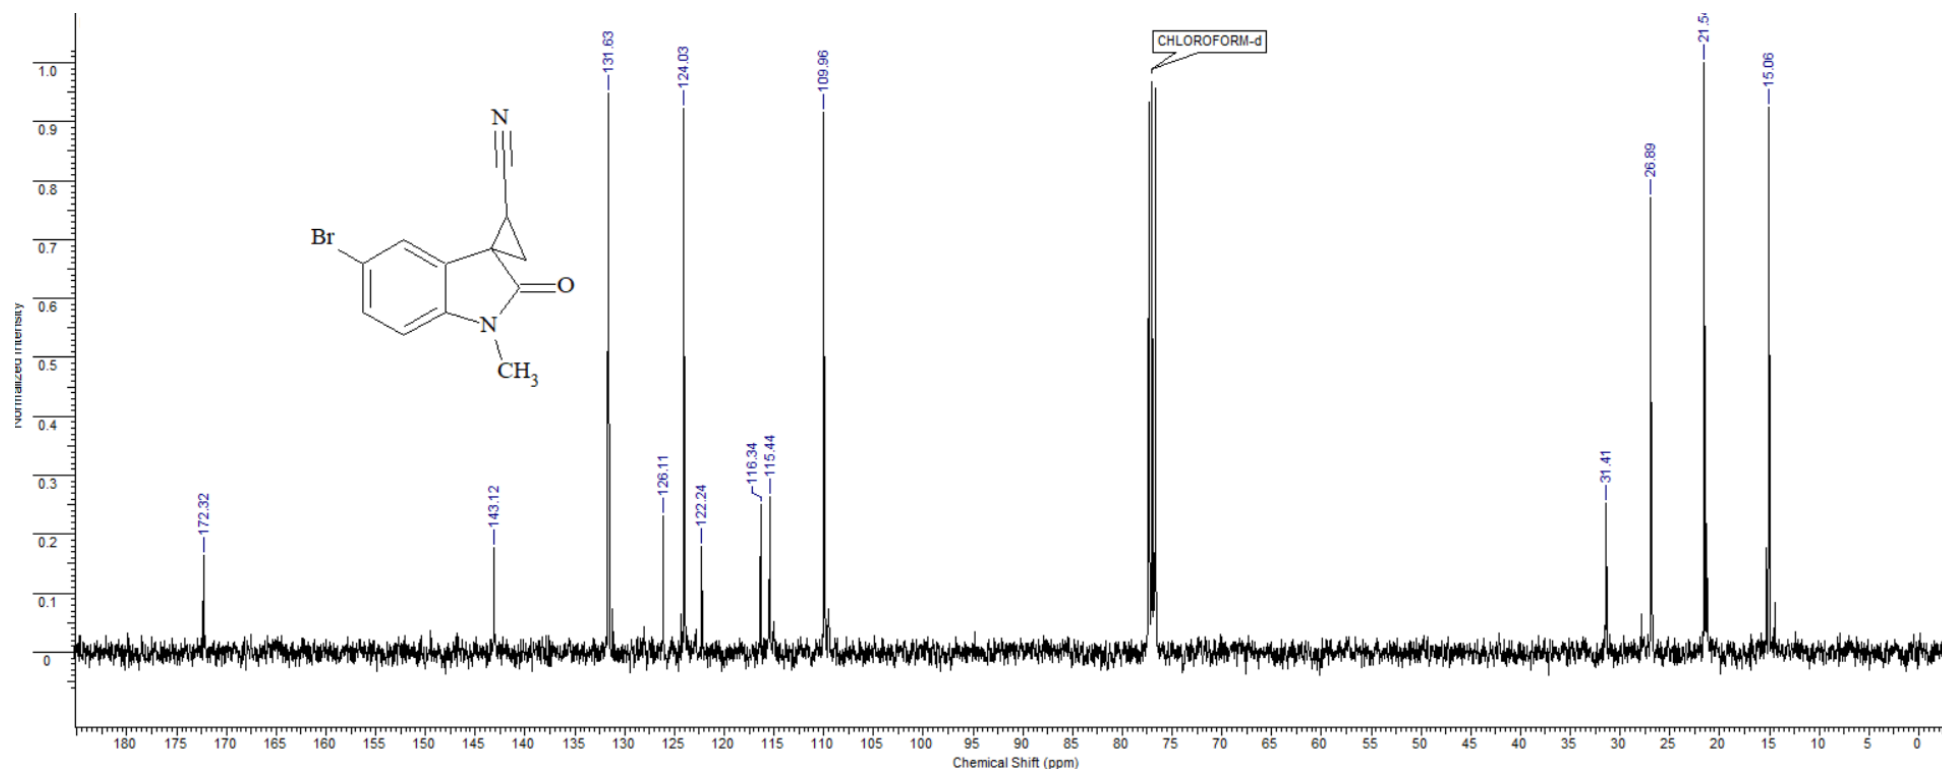

S41  $^1\text{H}$  NMR spectrum of 1',6',7'-Trimethyl-2'-oxo-1',2'-dihydrospiro[cyclopropane-1,3'-indole]-3-carbonitrile (single isomer from 6d) (**6j**)

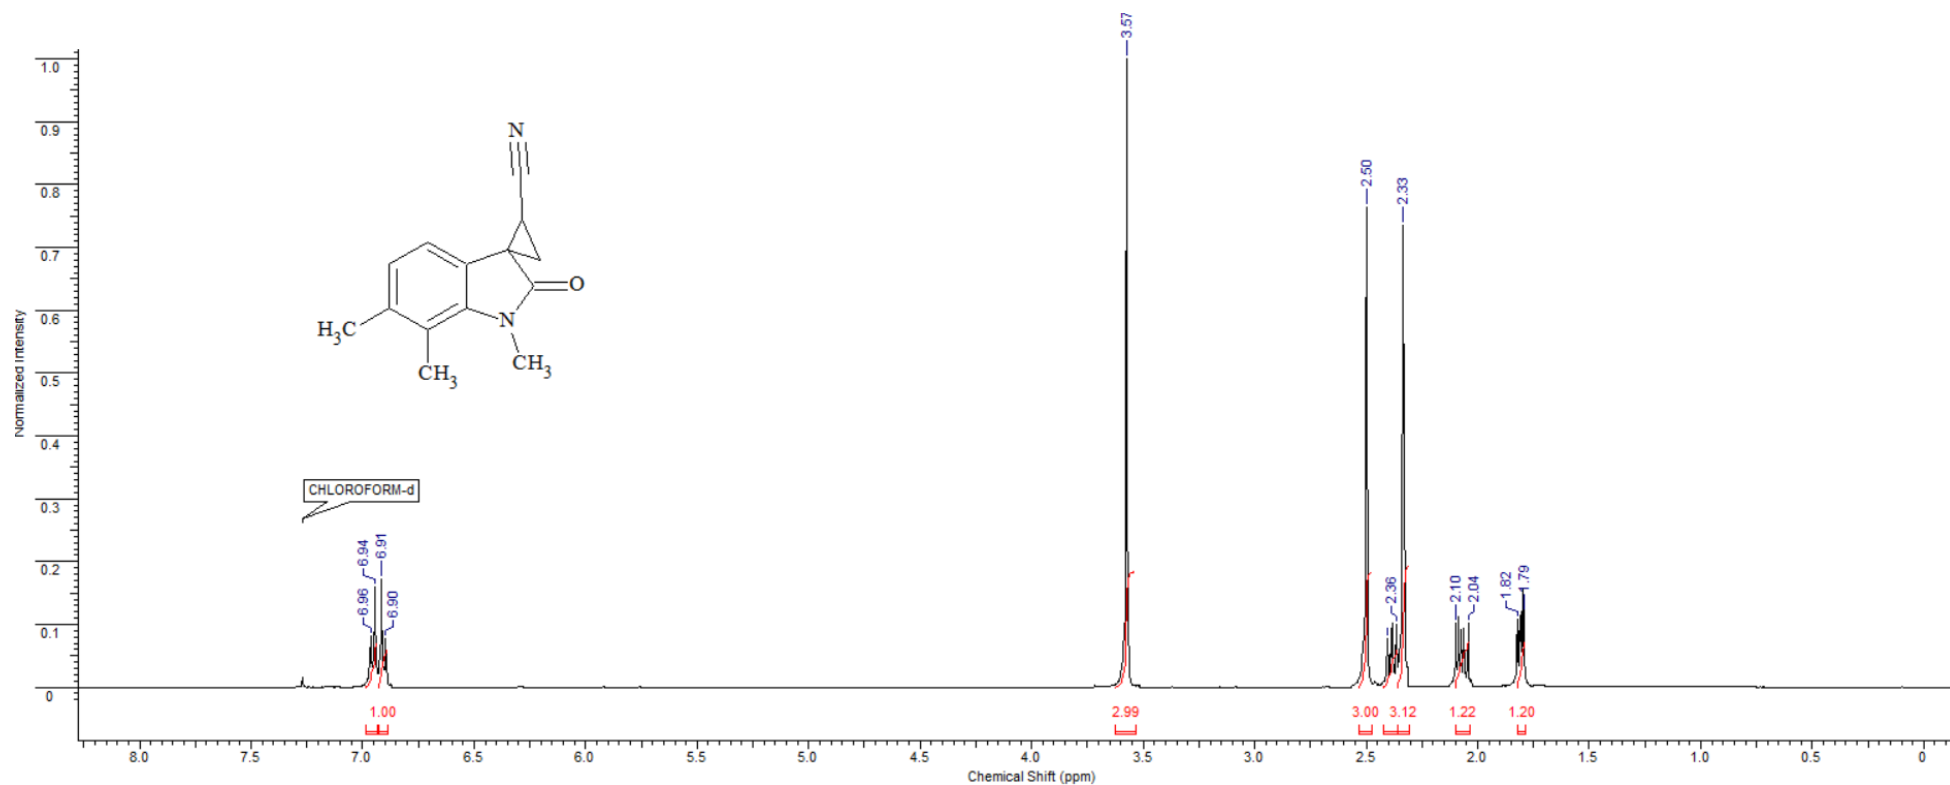

S42  $^1\text{H}$  NMR spectrum of 1',6',7'-Trimethyl-2'-oxo-1',2'-dihydrospiro[cyclopropane-1,3'-indole]-3-carbonitrile (mixture of isomers from **3j**) (**6j**)

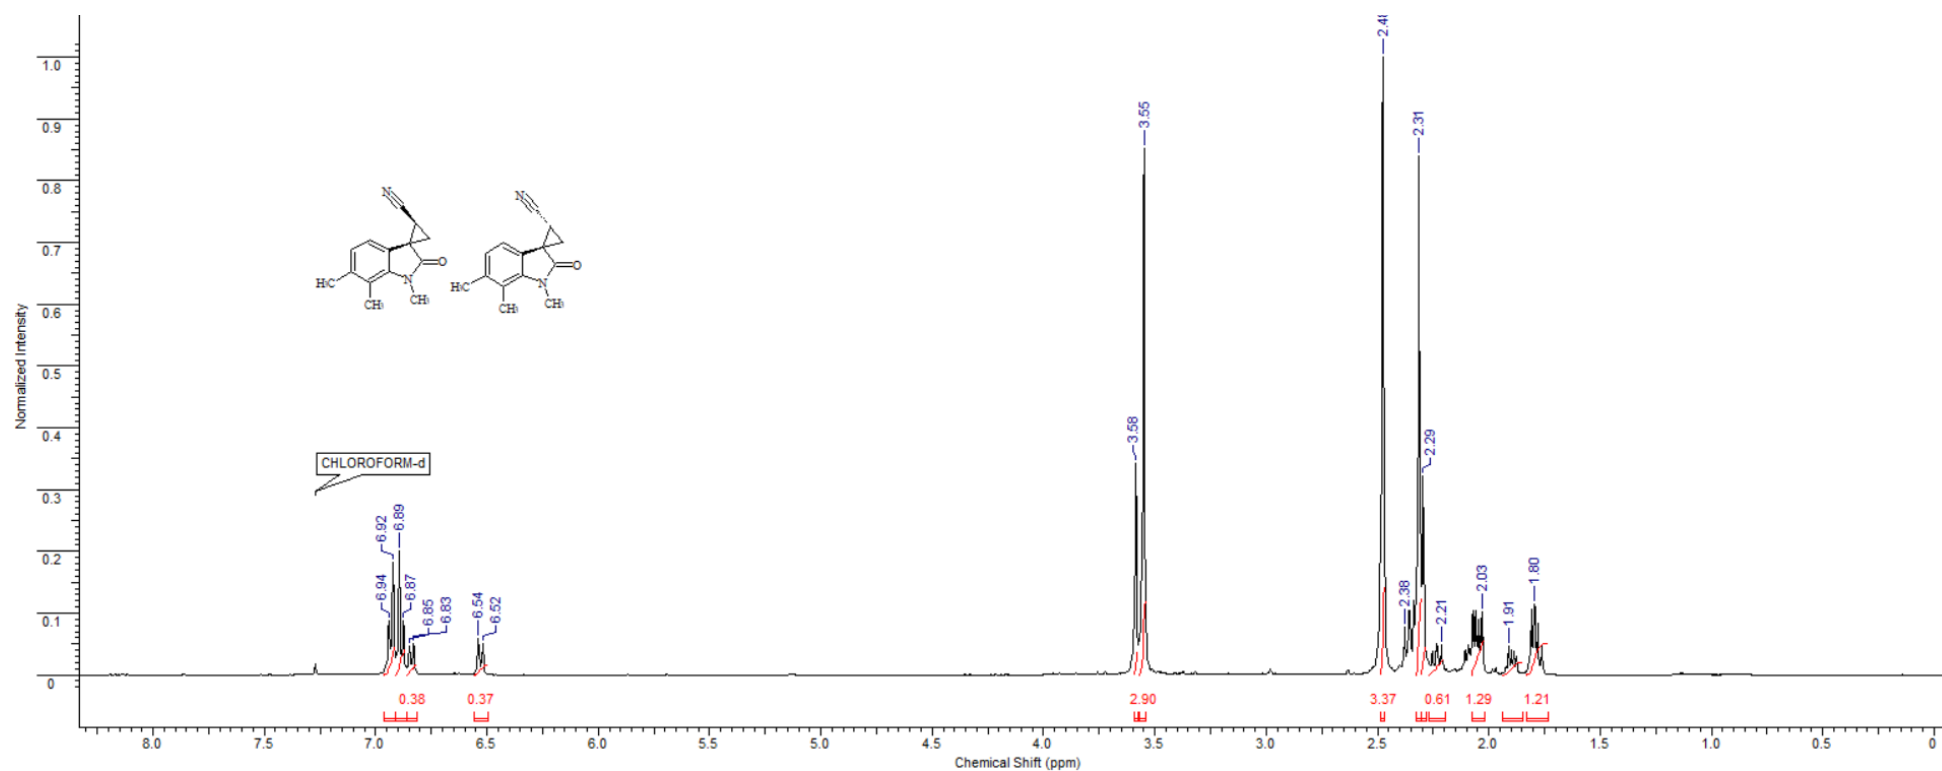

S43  $^1\text{H}$  NMR spectrum of N-[(1,3-dimethyl-5-methoxy-2-oxo-2,3-dihydro-1H-indol-3-yl)ethyl]acetamide (**7b**)

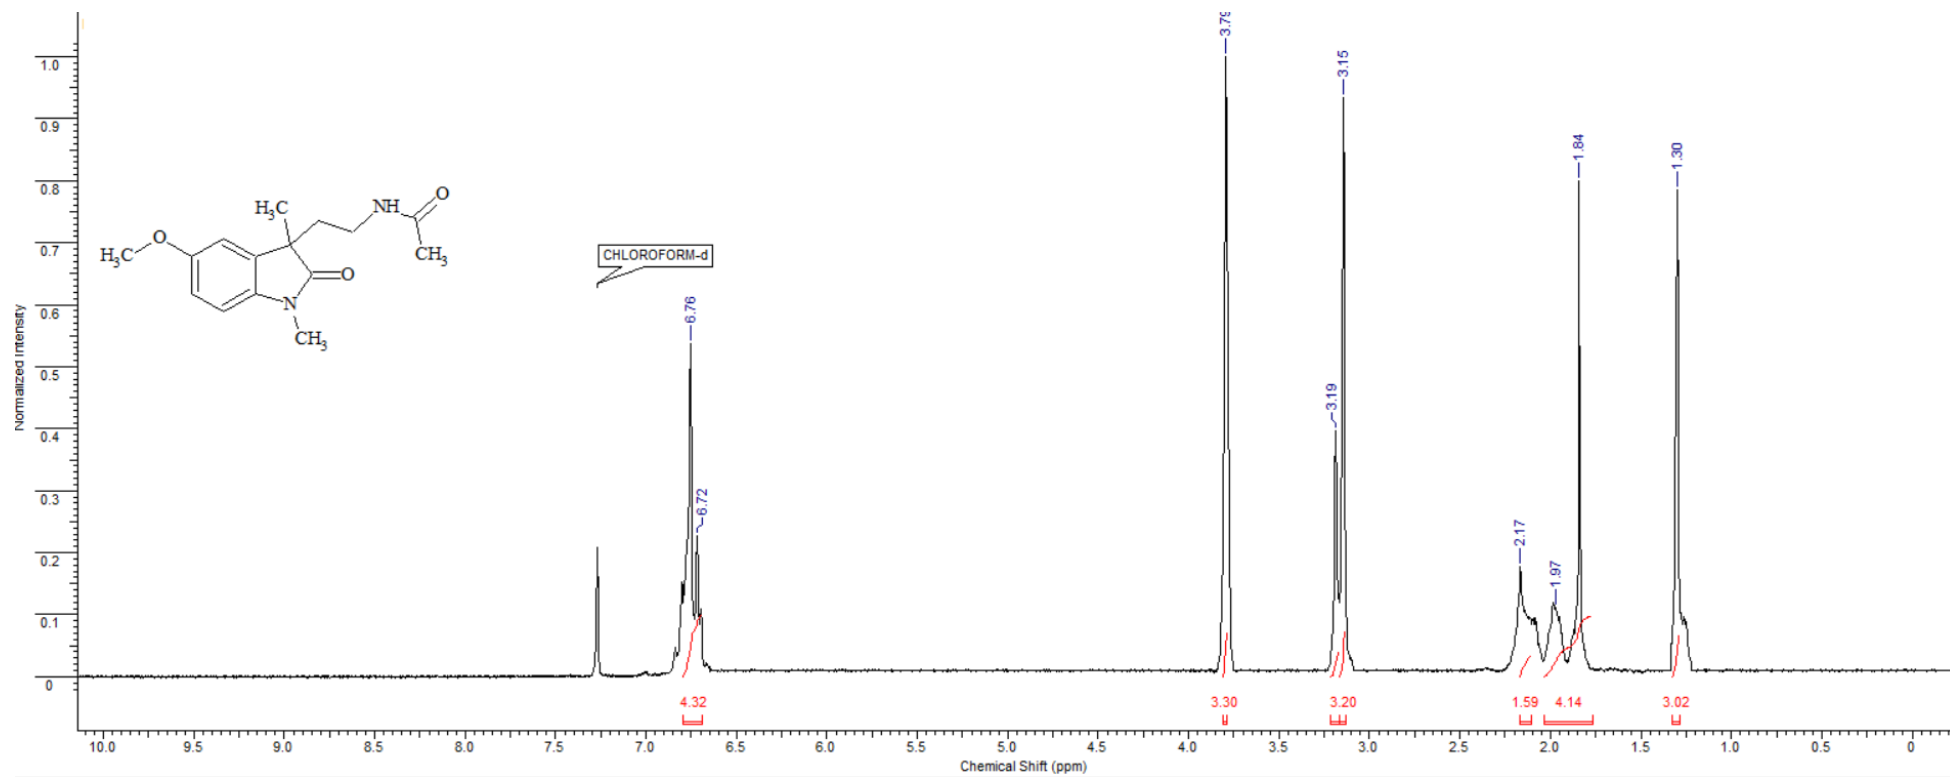

S44 <sup>1</sup>H NMR spectrum of N-[2-(1,3-Dimethyl-2,3-dihydro-1H-indol-3-yl)ethyl]acetamide (**8a**)

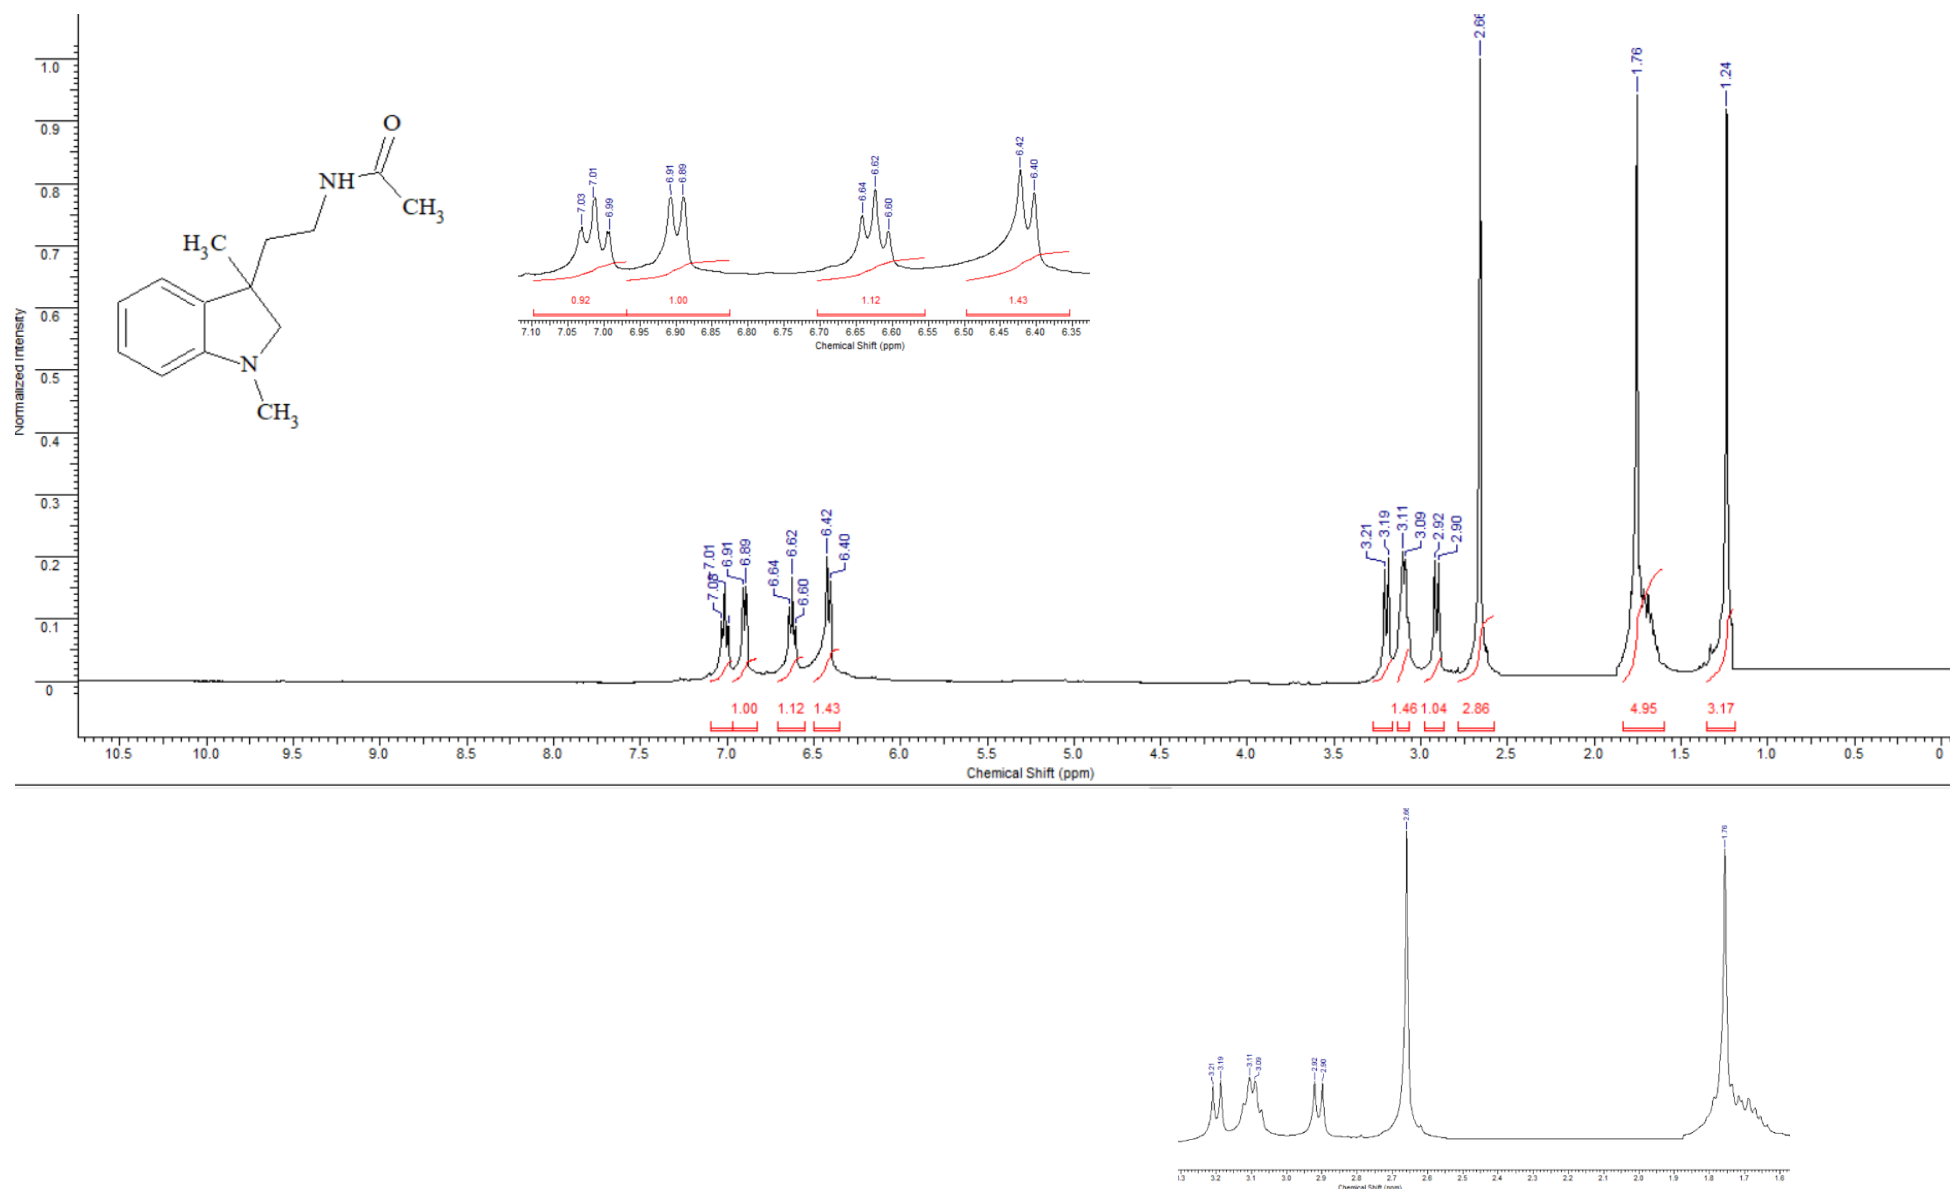

S45 <sup>13</sup>C NMR spectrum of N-[2-(1,3-Dimethyl-2,3-dihydro-1H-indol-3-yl)ethyl]acetamide (**8a**)

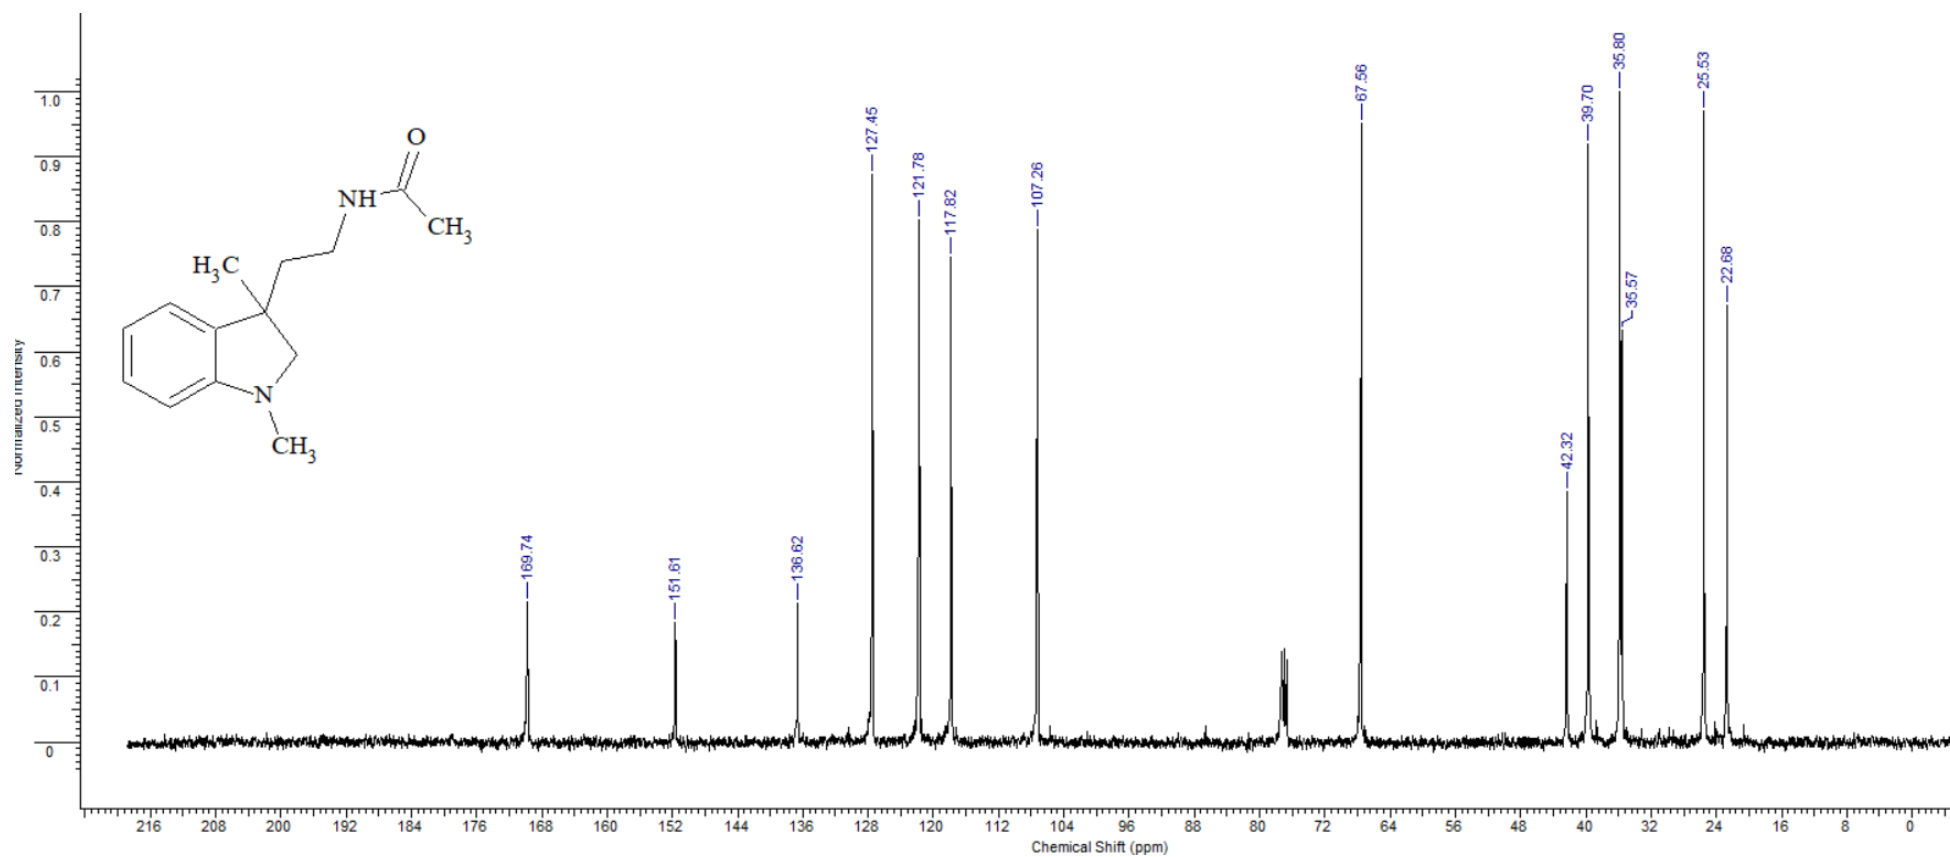

S46 <sup>1</sup>H NMR spectrum of N-[2-(1-Benzyl-3-methyl-2,3-dihydro-1H-indol-3-yl)ethyl]acetamide (**8b**)

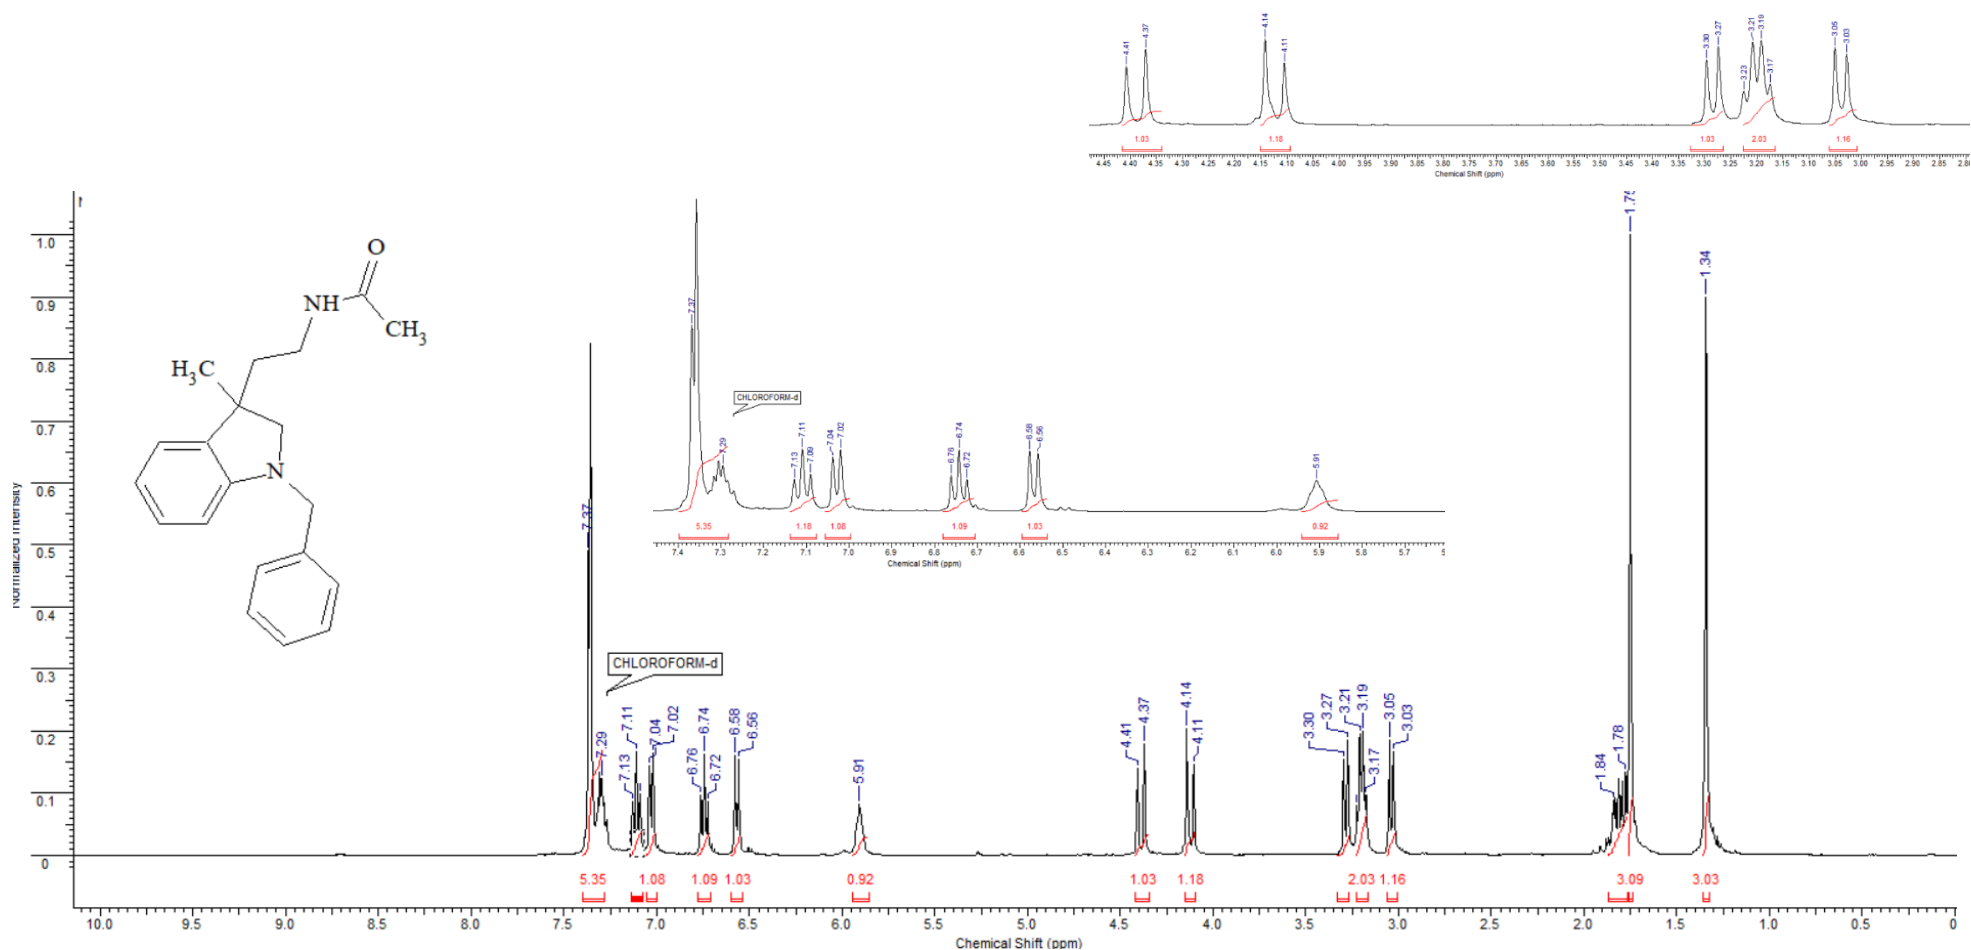

S47 <sup>13</sup>C NMR spectrum of N-[2-(1-Benzyl-3-methyl-2,3-dihydro-1H-indol-3-yl)ethyl]acetamide (**8b**)

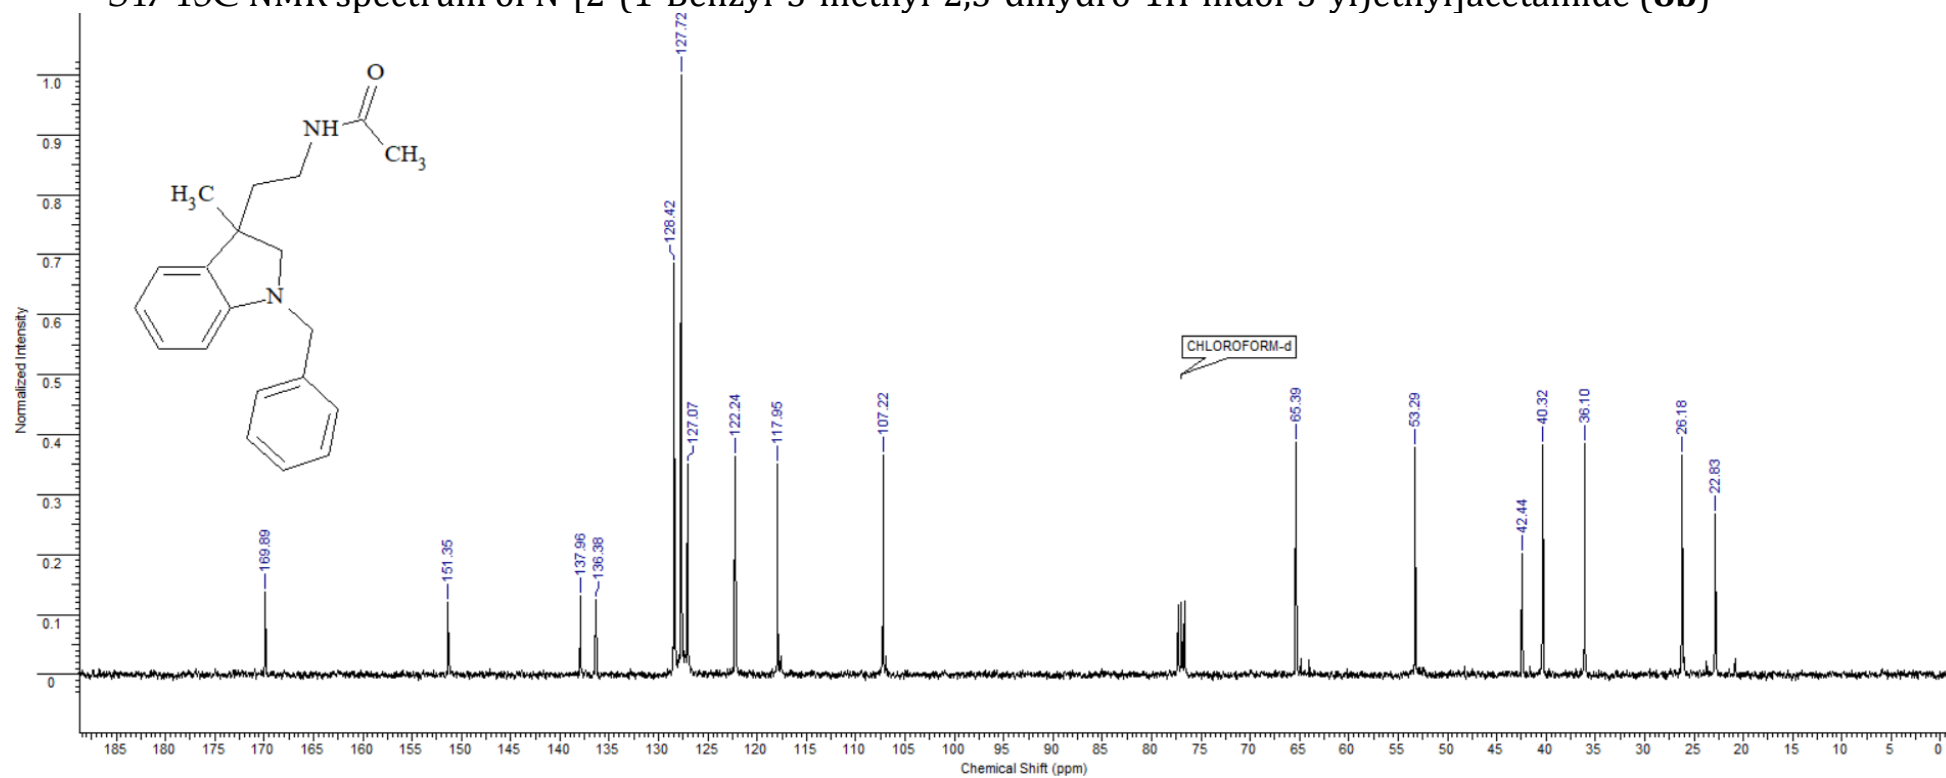

S48  $^1\text{H}$  NMR spectrum of N-[2-(1,3-Dimethyl-5-methoxy-2,3-dihydro-1H-indol-3-yl)ethyl]acetamide (**8e**)

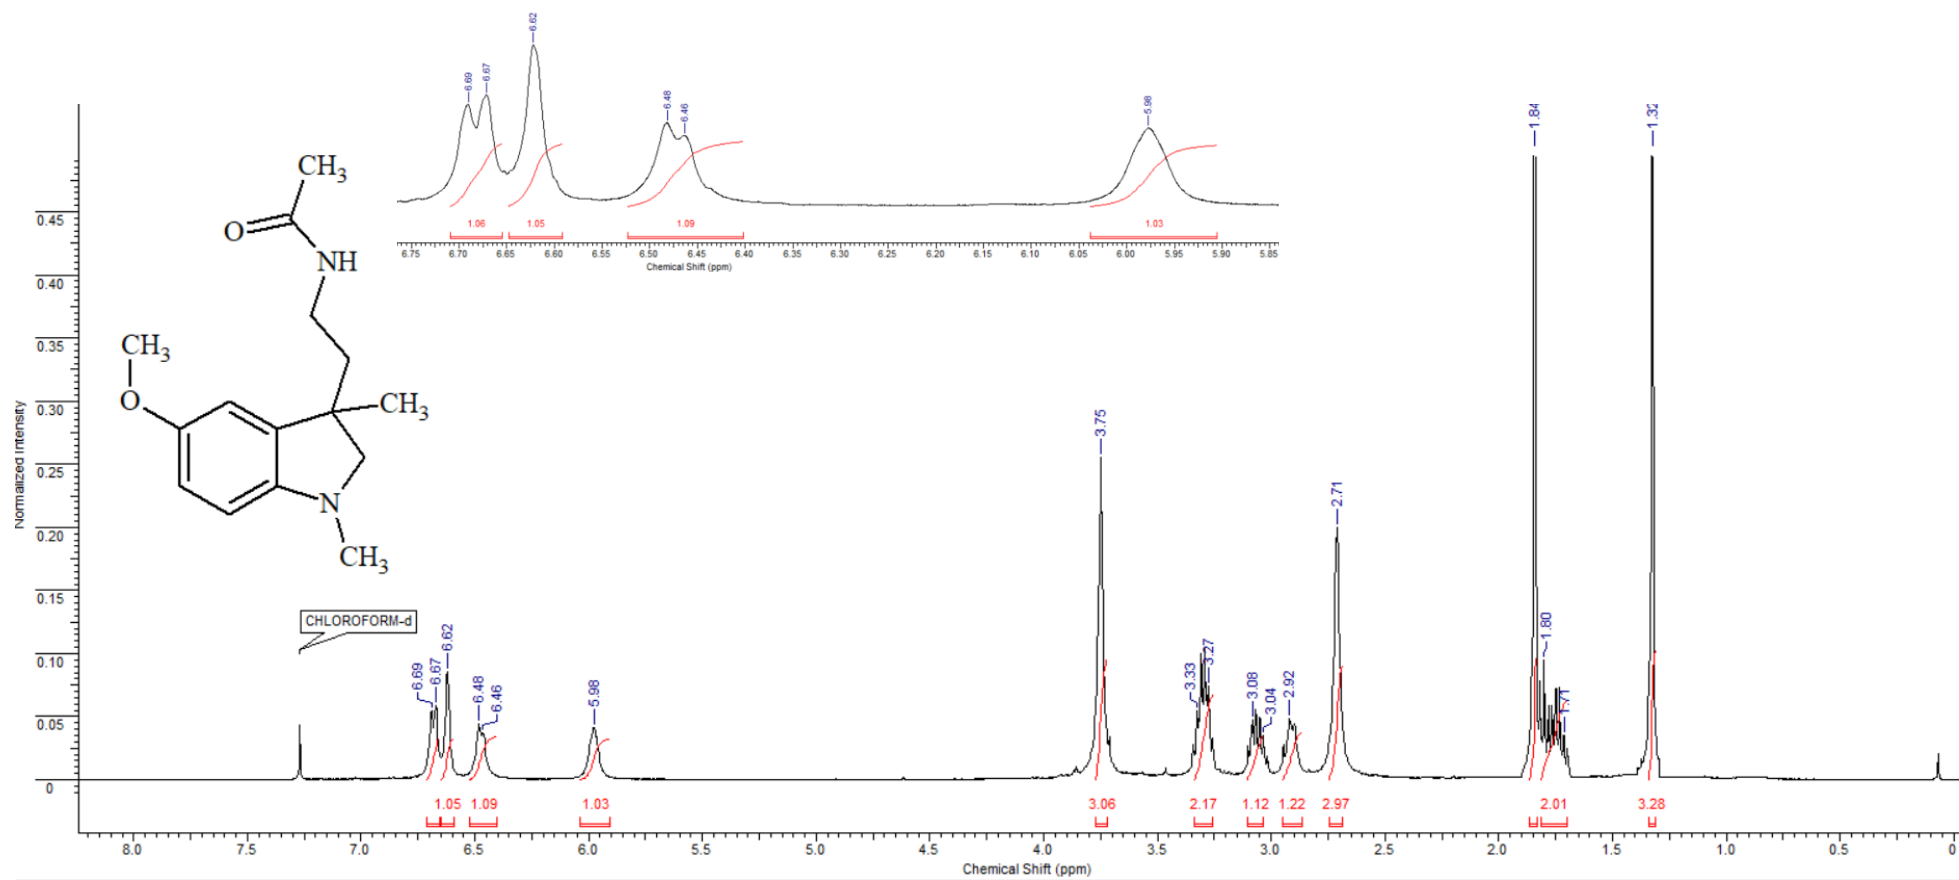

S49  $^{13}\text{C}$  NMR spectrum of N-[2-(1,3-Dimethyl-5-methoxy-2,3-dihydro-1H-indol-3-yl)ethyl]acetamide (**8e**)

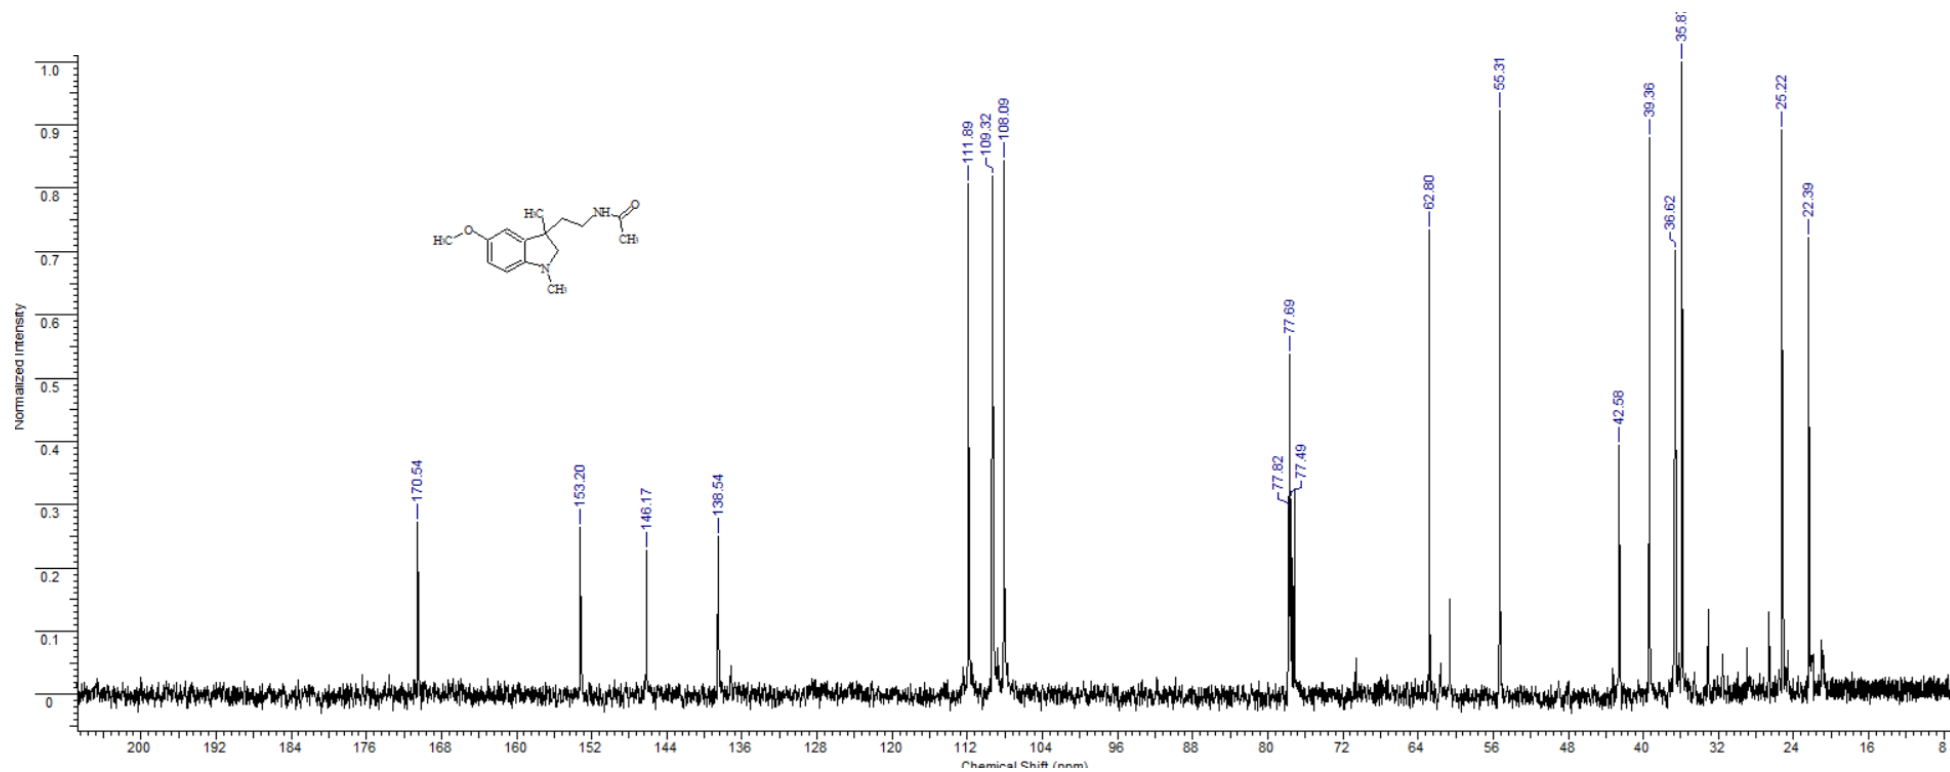

S50  $^1\text{H}$  NMR spectrum of *N*-[2-(1-Benzyl-3-methyl-5-methoxy-2,3-dihydro-1*H*-indol-3-yl)ethyl]acetamide (**8f**)

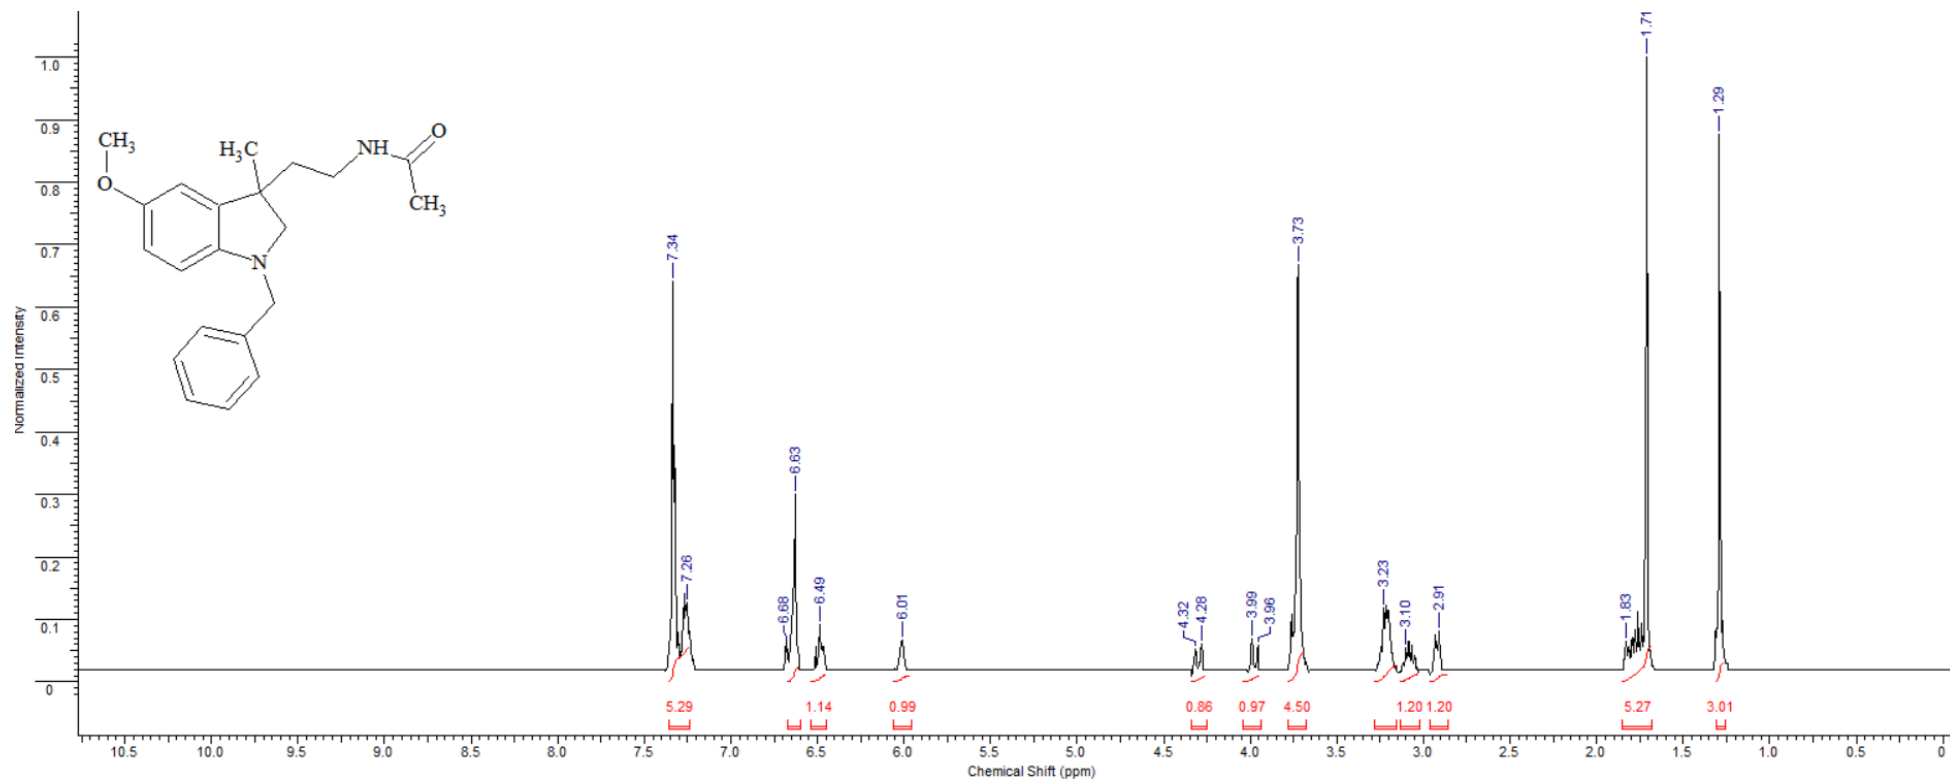

S51  $^{13}\text{C}$  NMR spectrum of *N*-[2-(1-Benzyl-3-methyl-5-methoxy-2,3-dihydro-1*H*-indol-3-yl)ethyl]acetamide (**8f**)

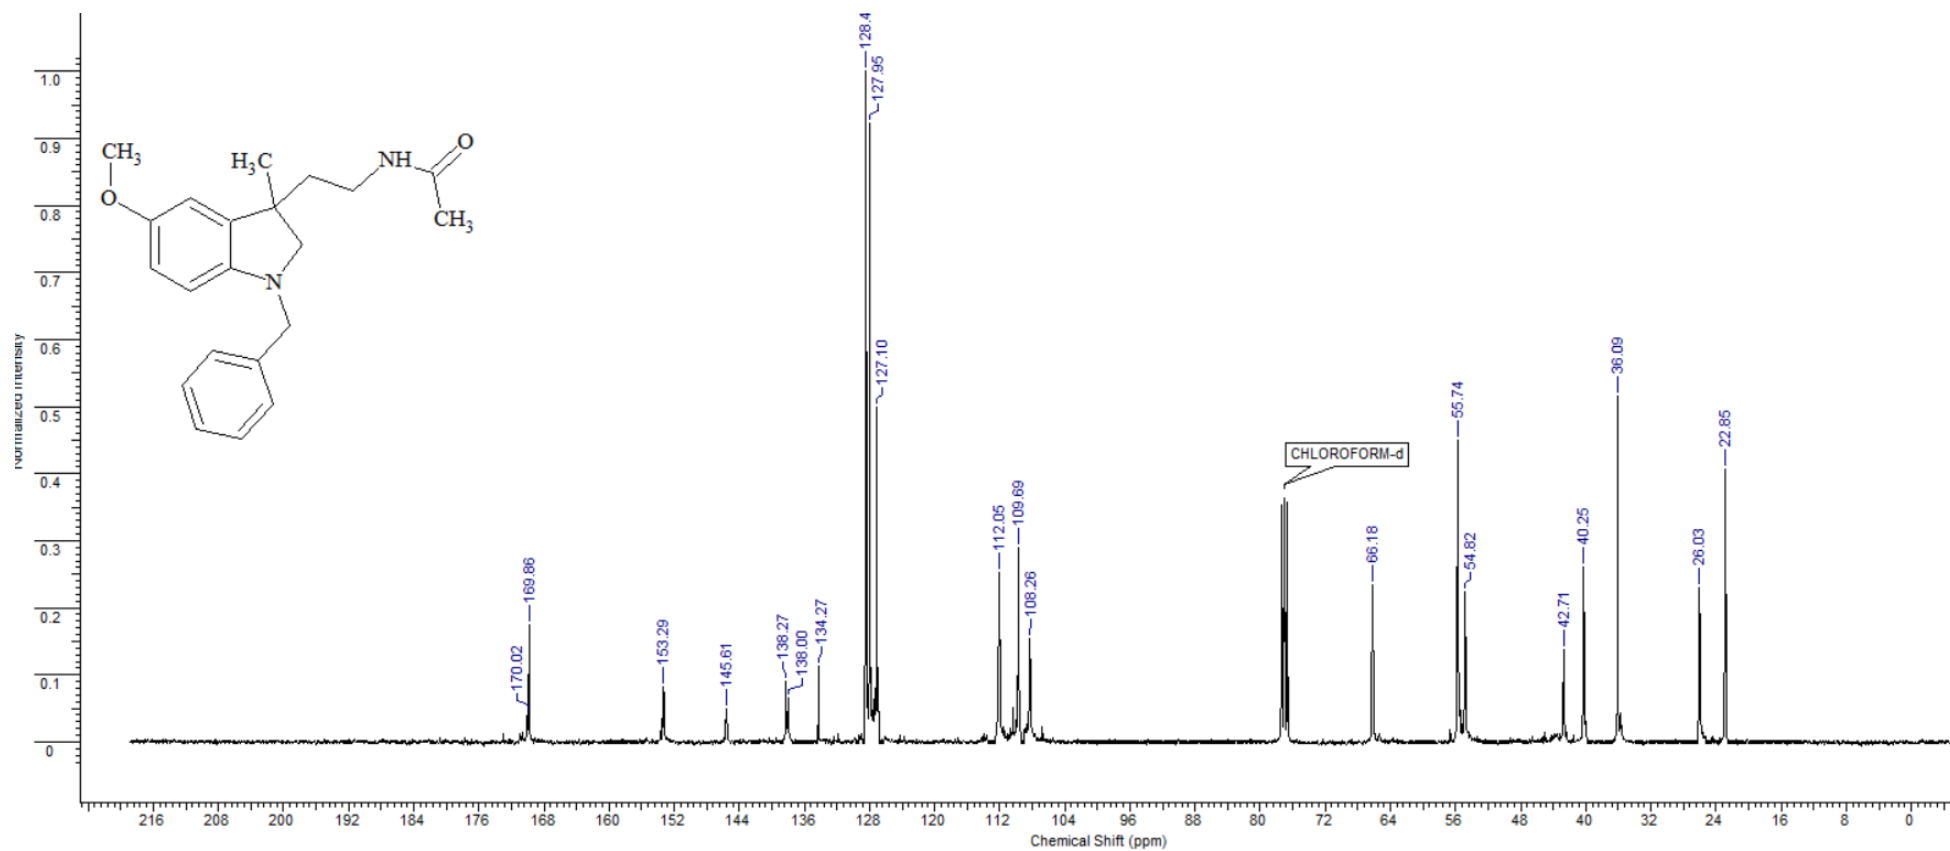

S52  $^1\text{H}$  NMR spectrum of *N*-[2-(1-Methyl-1*H*-indol-3-yl)ethyl]acetamide (**9i**)

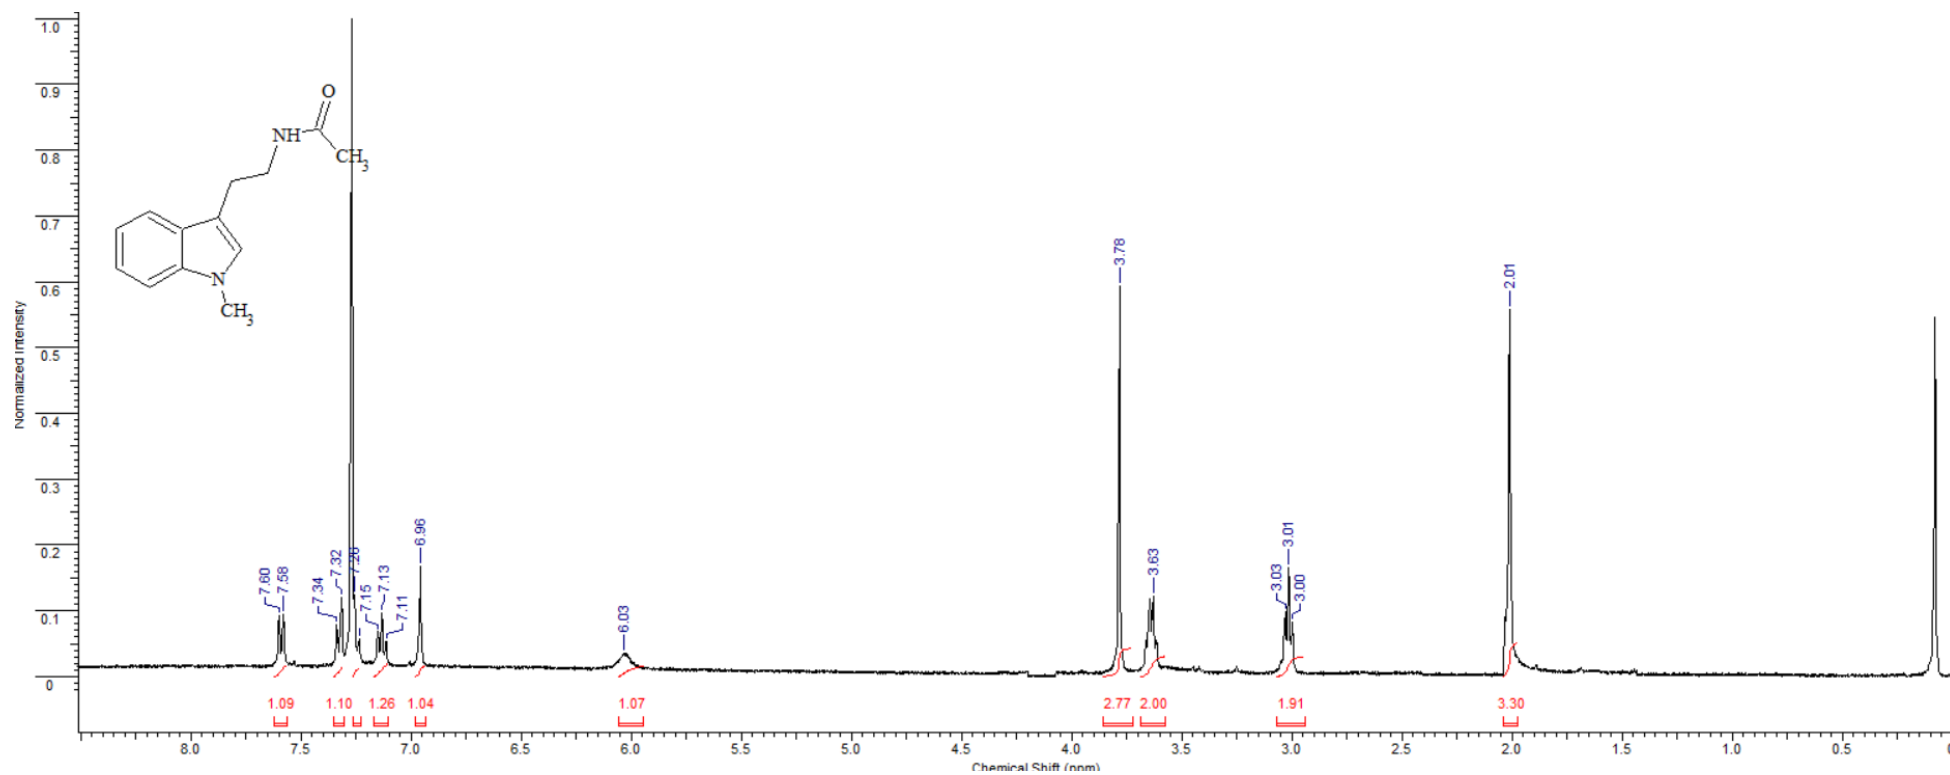

S53 <sup>1</sup>H NMR spectrum of N-[2-(1,3,6,7-Tetramethyl-2,3-dihydro-1H-indol-3-yl)ethyl]acetamide (**8k**)

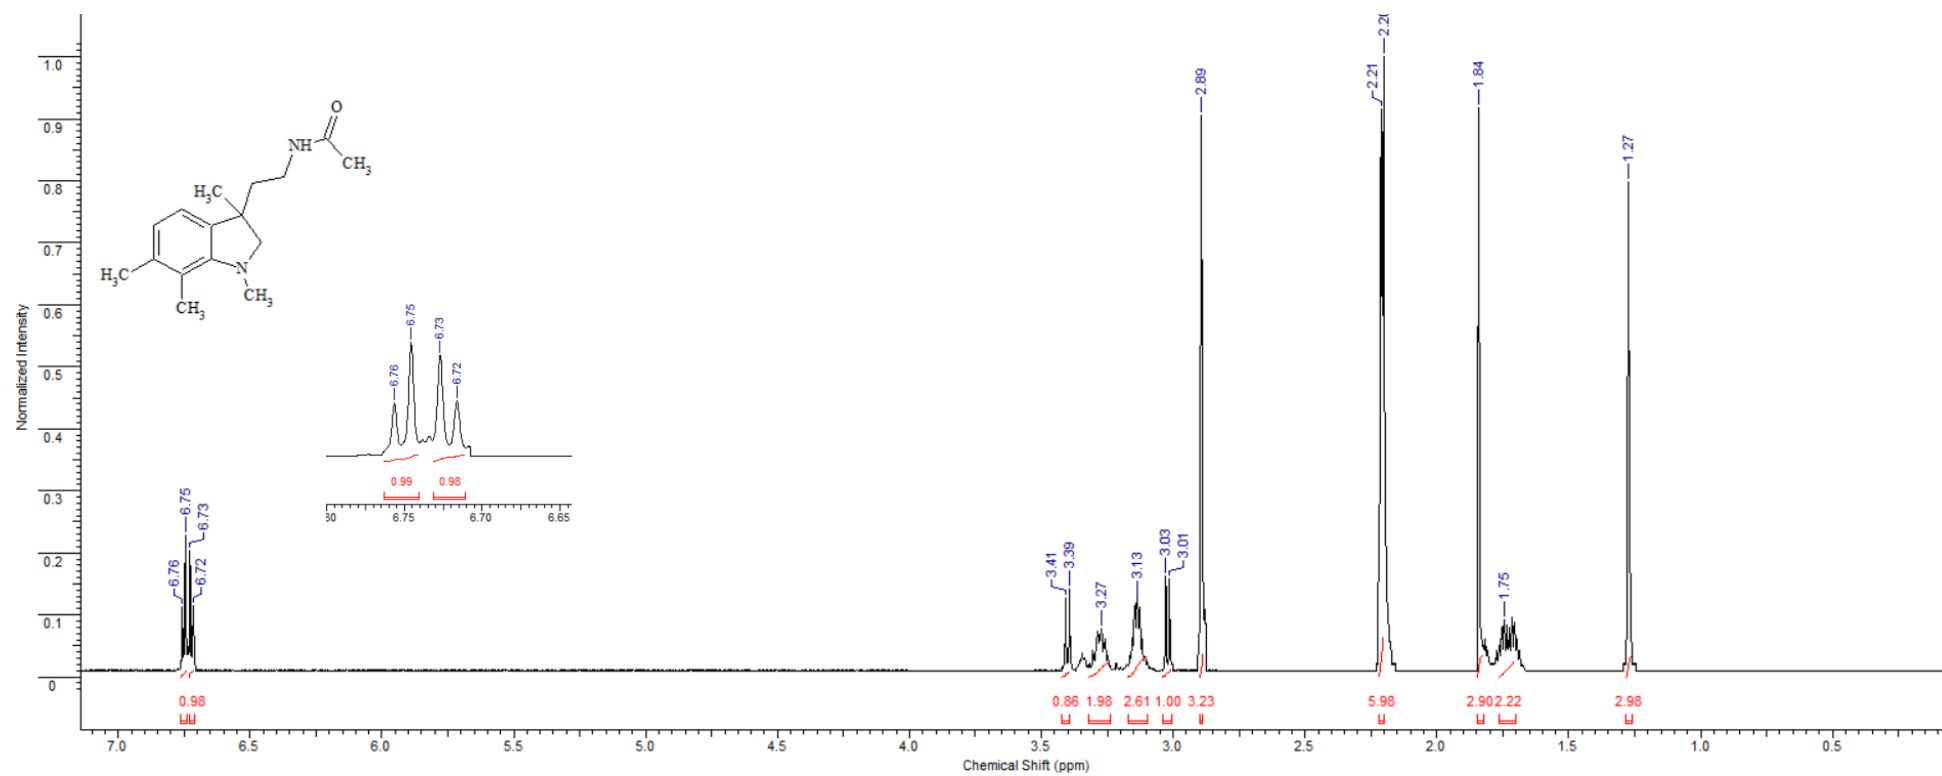

S54 <sup>1</sup>H NMR spectrum of *N*-[2-(1,6,7-Trimethyl-1*H*-indol-3-yl)ethyl]acetamide (**9I**)

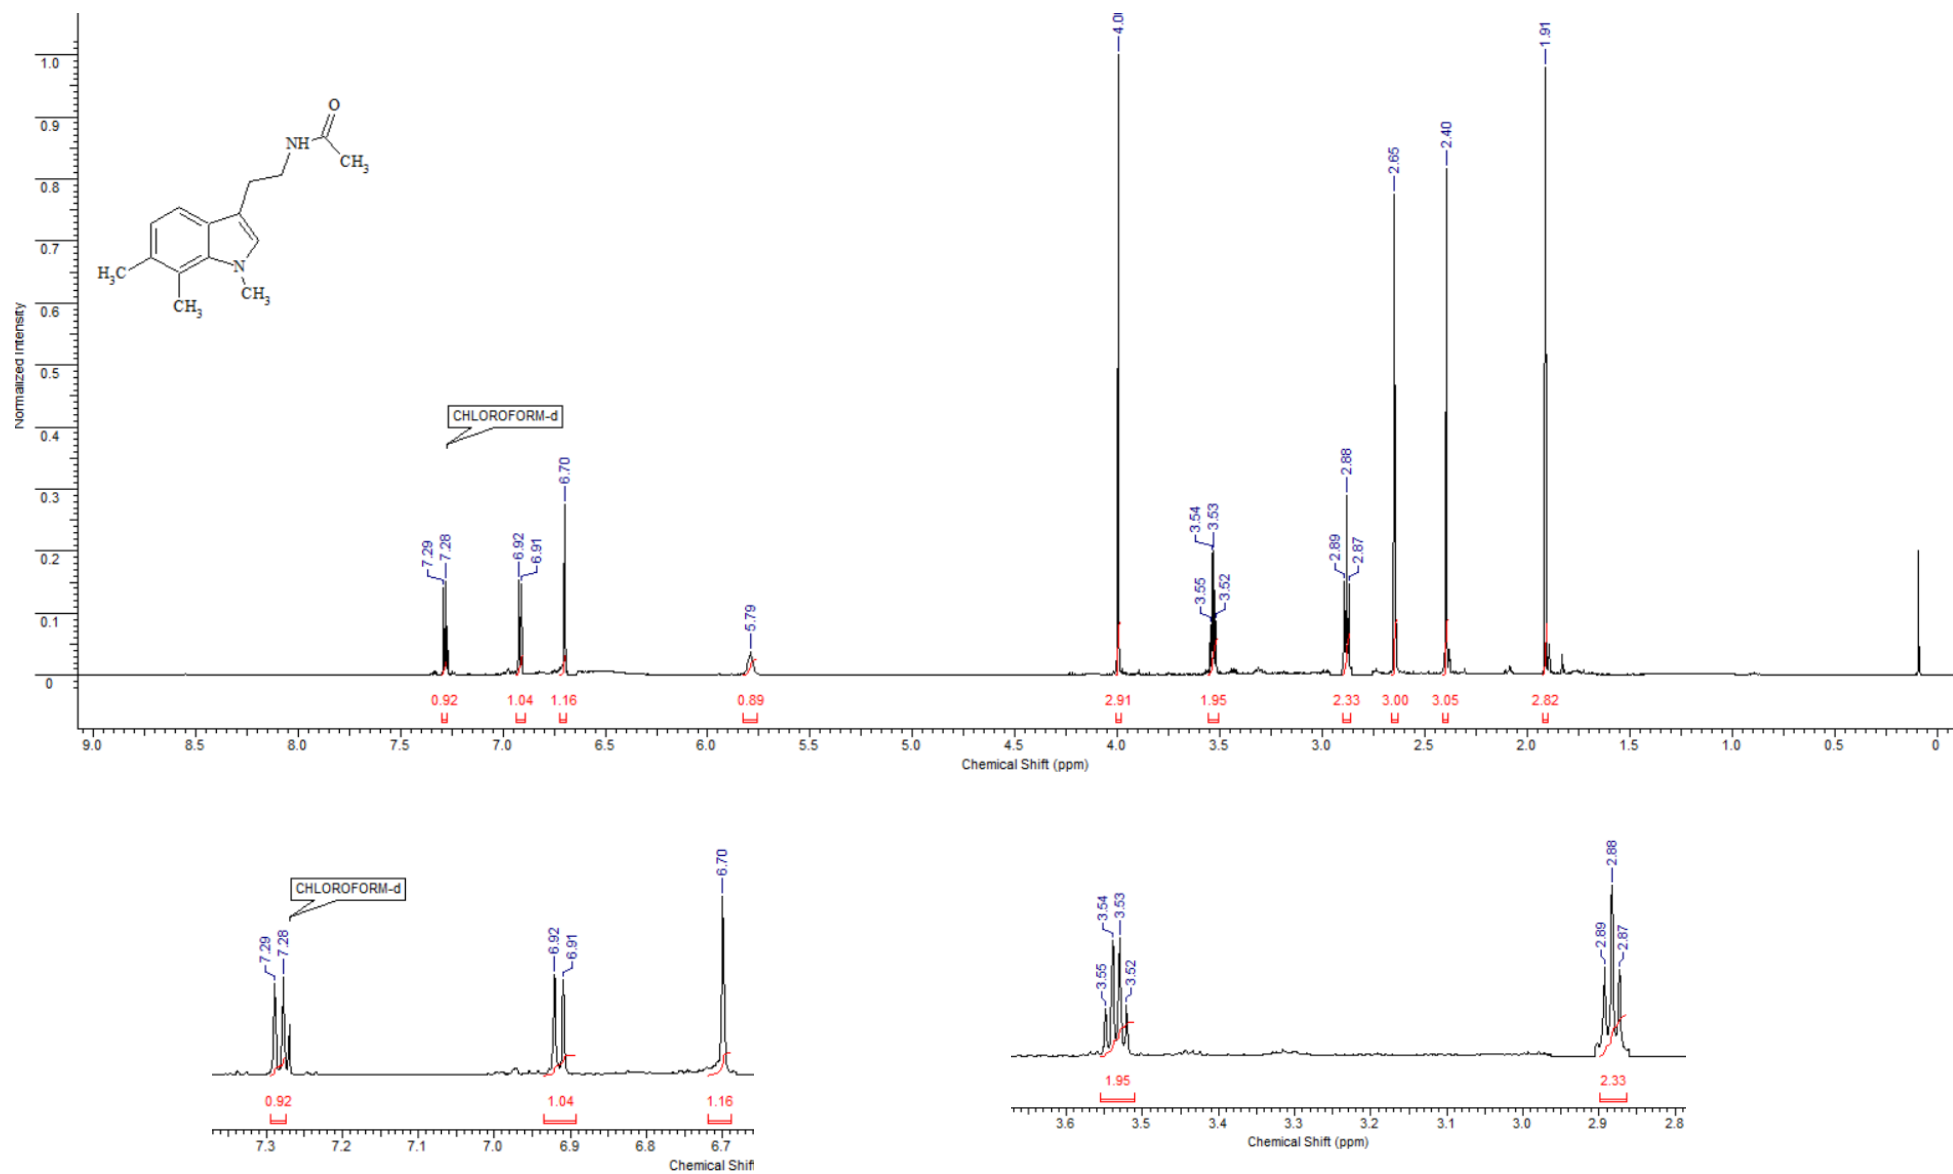

S55  $^{13}\text{C}$  NMR spectrum of *N*-[2-(1,6,7-Trimethyl-1*H*-indol-3-yl)ethyl]acetamide (**9l**)

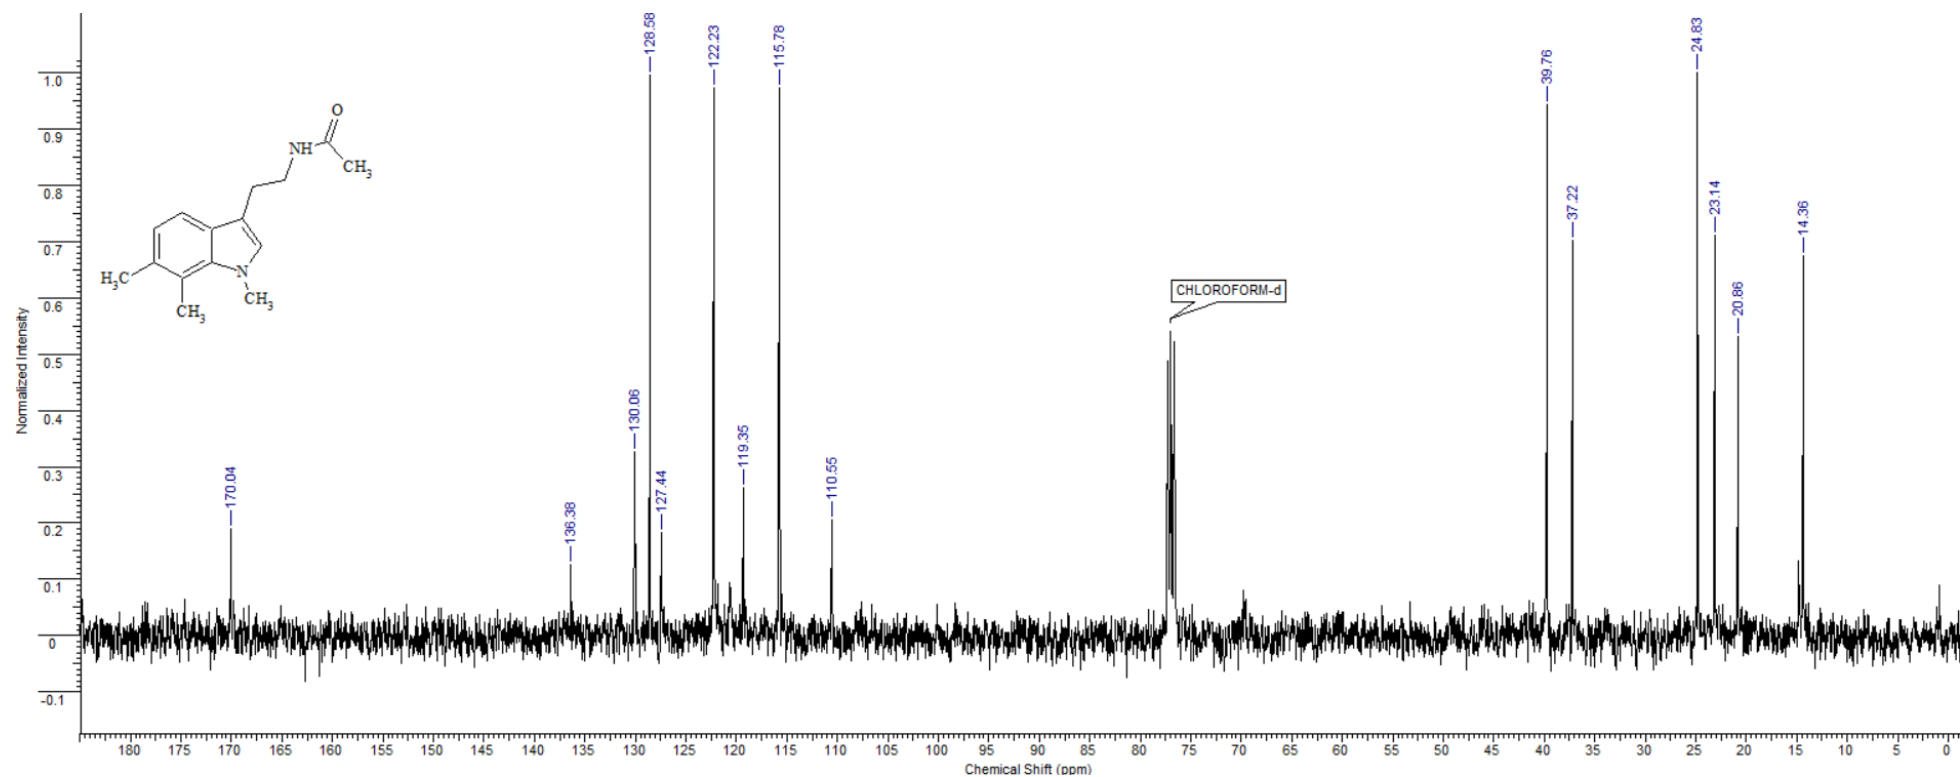

S56  $^1\text{H}$  NMR spectrum of *N*-[2-(1-benzyl-2,3-dihydro-1*H*-indol-3-yl)ethyl]acetamide (**8m**) and indol (**9m**) after incubation **8m** in DMSO for 1 day.

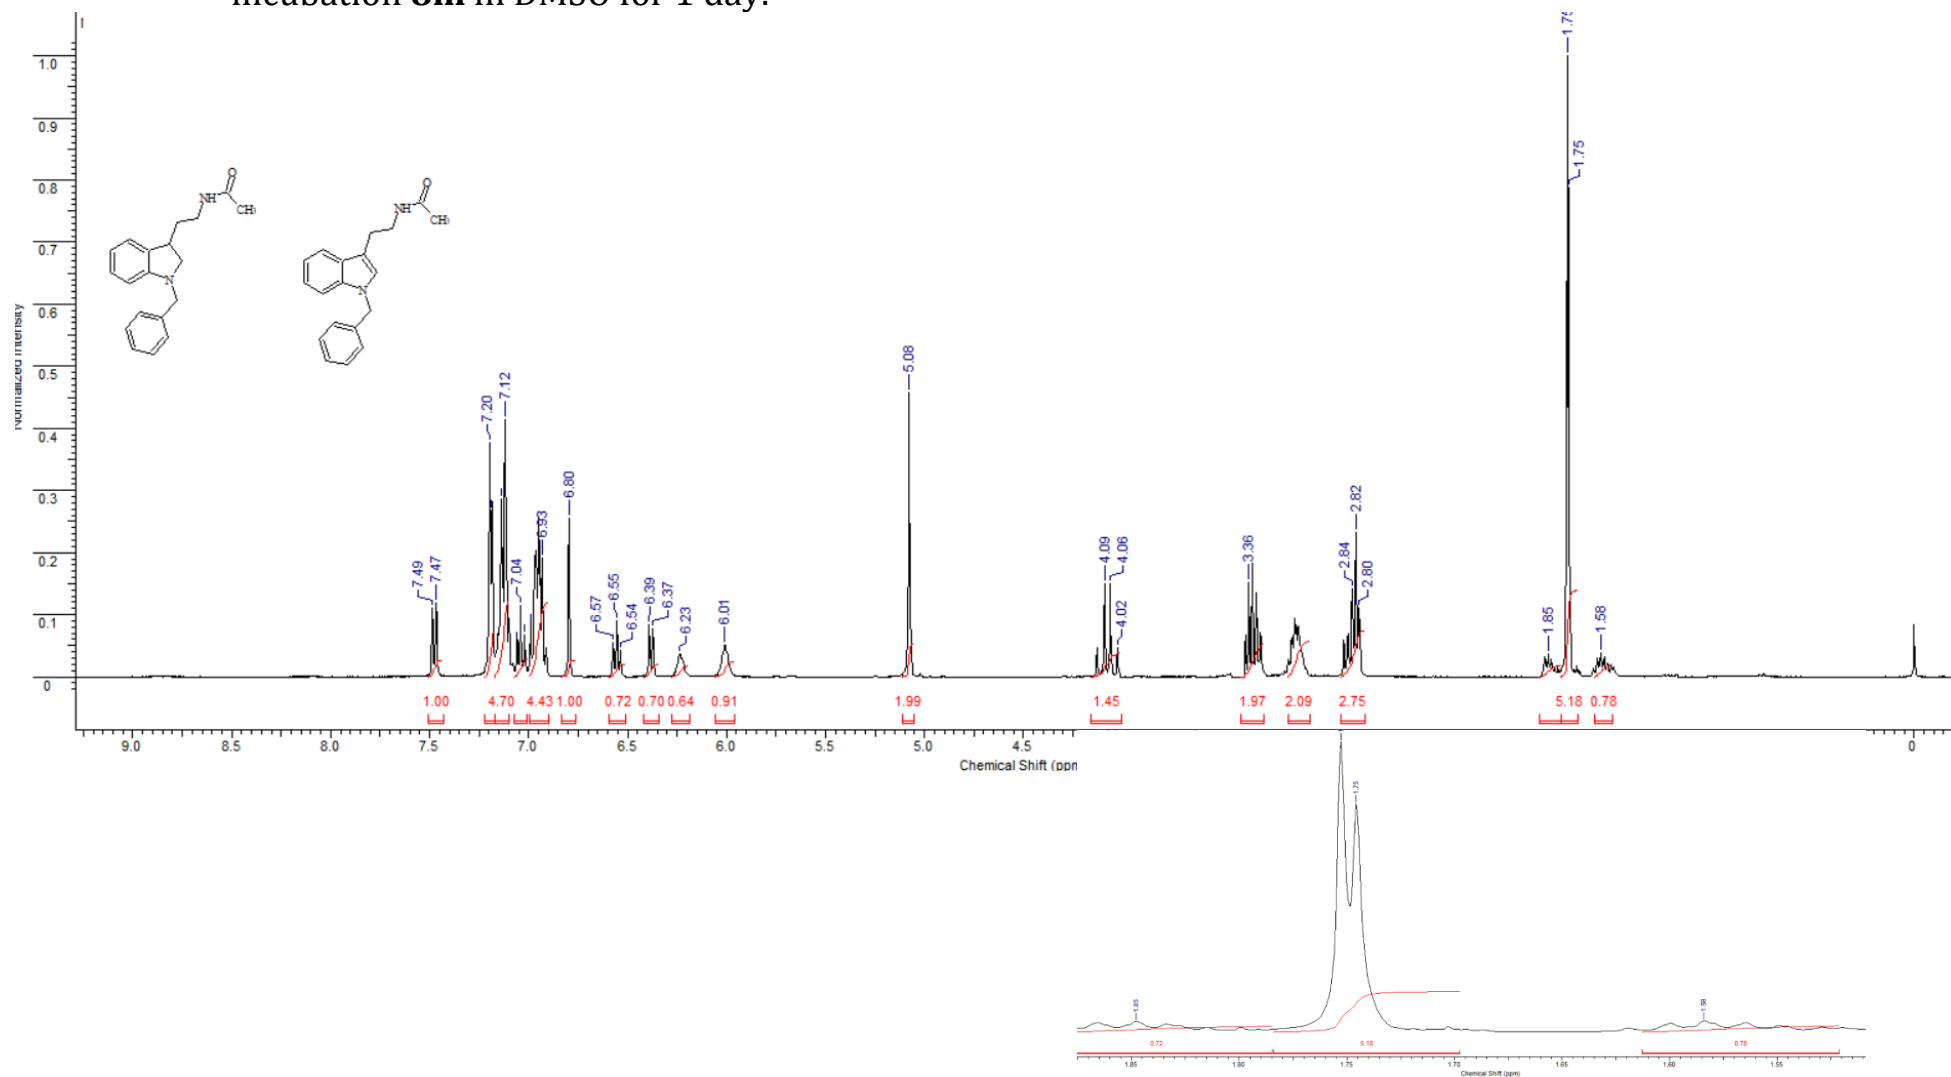

S57 <sup>1</sup>H NMR spectrum of *N*-{1'-Methyl-1',2'-dihydrospiro[cyclopropan-1,3'-indol]-3-ylmethyl}acetamide (**10a**)

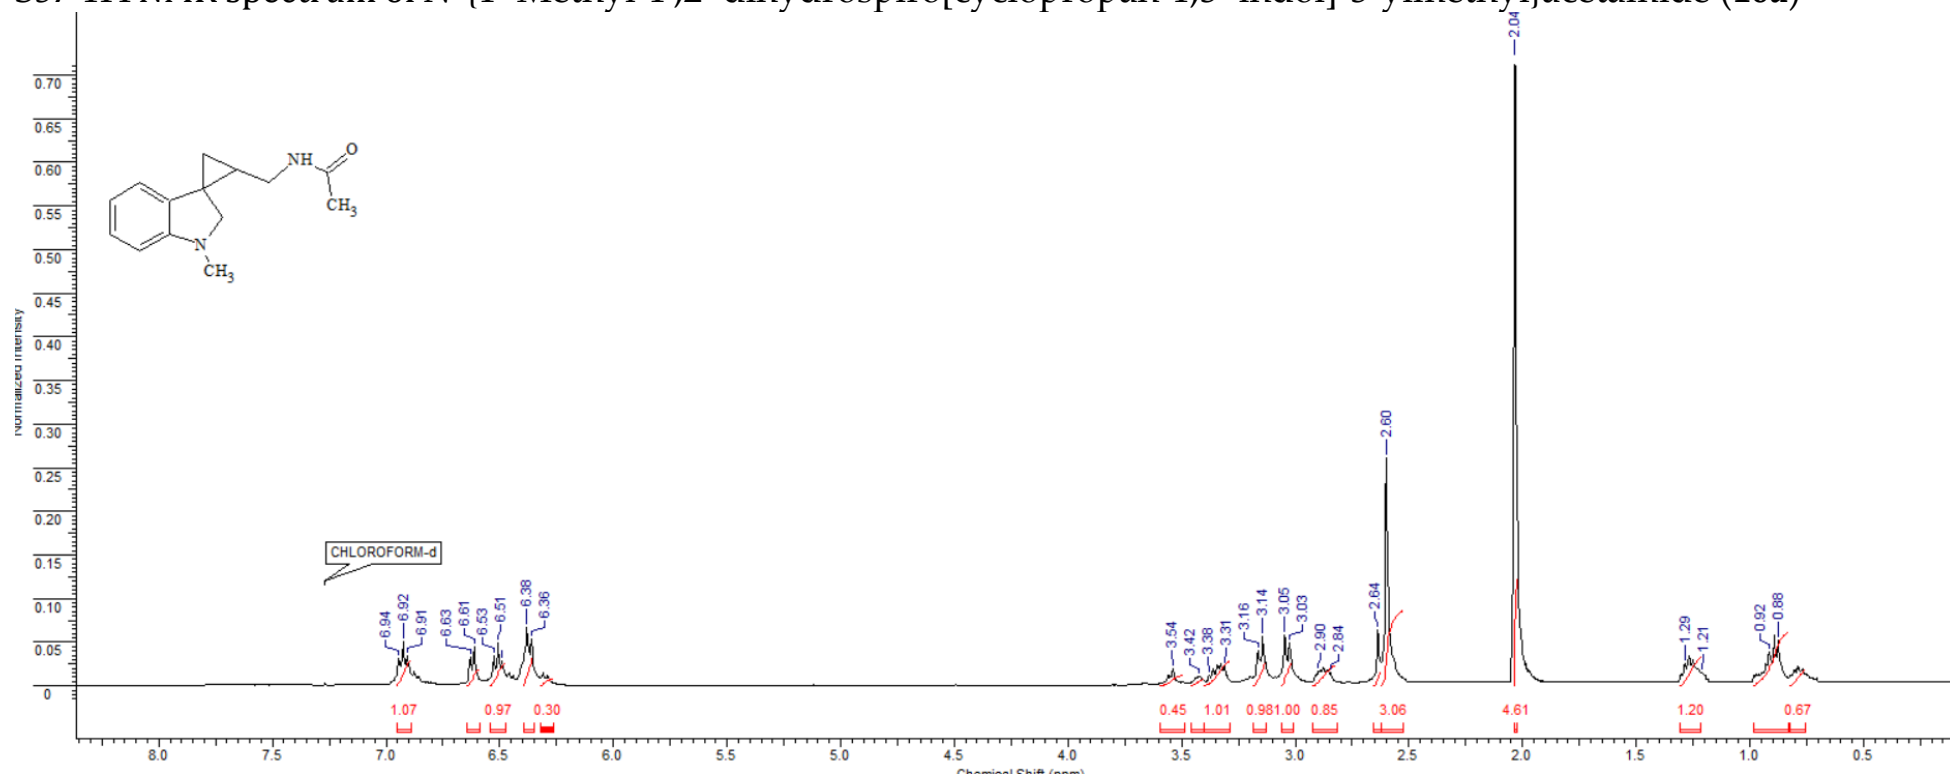

S58 <sup>13</sup>C NMR spectrum of *N*-(1'-Methyl-1',2'-dihydrospiro[cyclopropan-1,3'-indol]-3-ylmethyl)acetamide (two isomers) (10a)

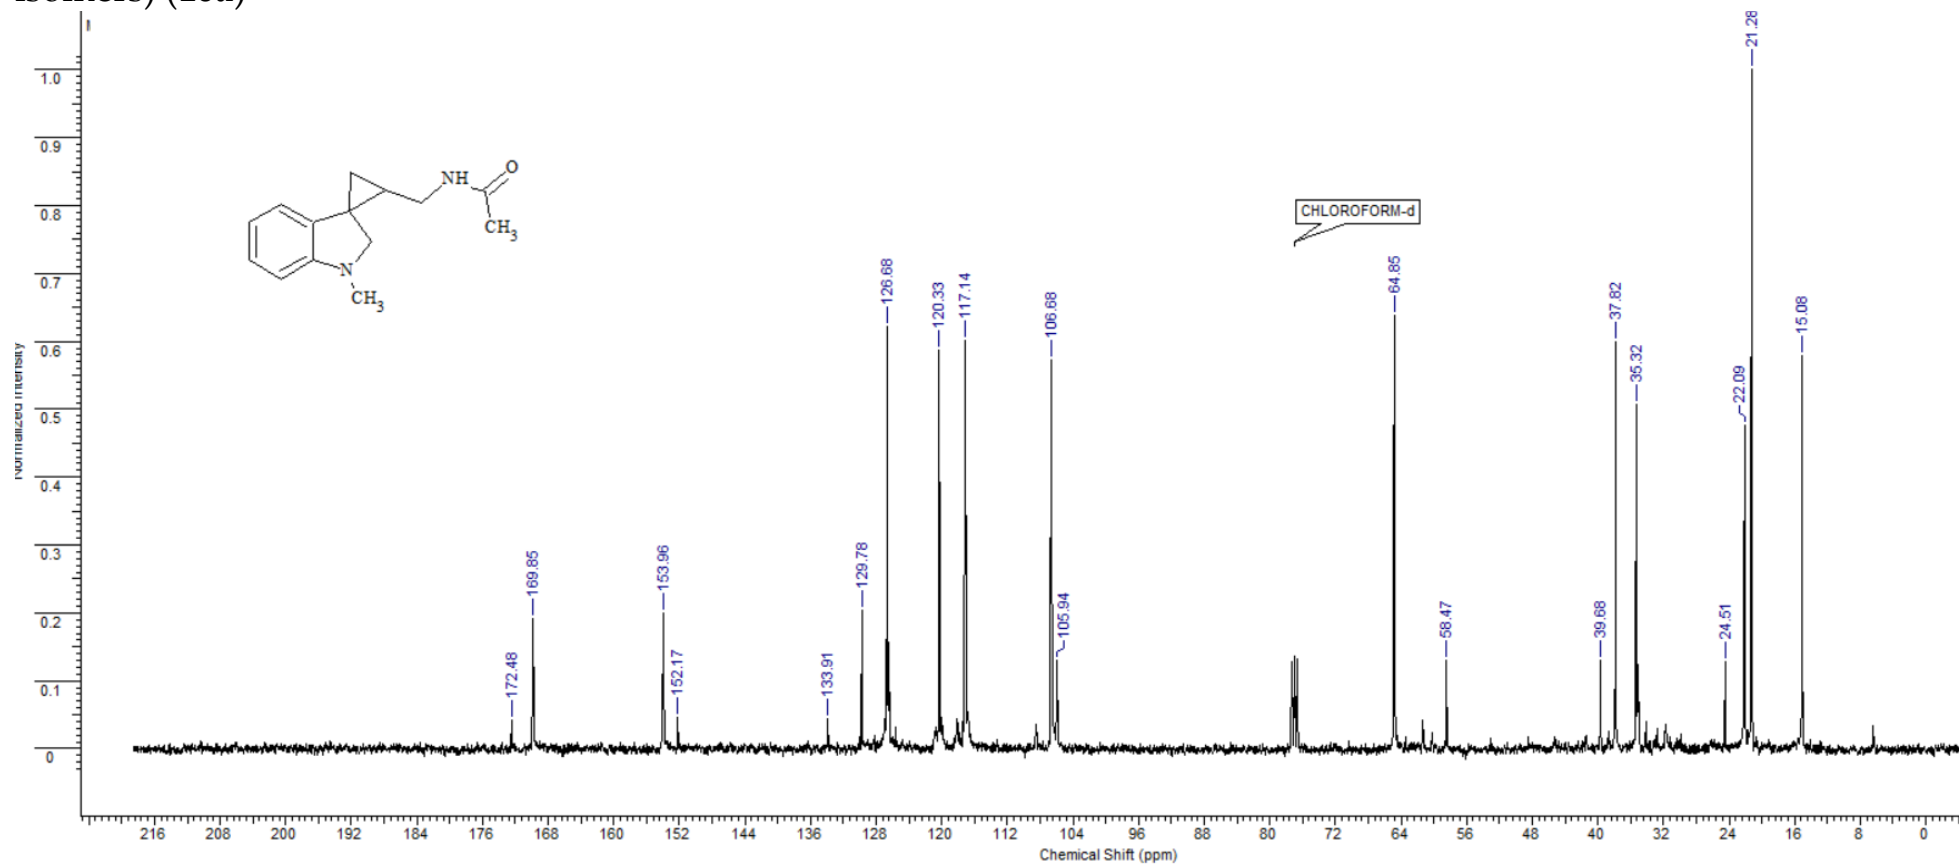

S59 <sup>1</sup>H NMR spectrum of *N*-{5'-Bromo-1'-methyl-1',2'-dihydrospiro[cyclopropan-1,3'-indol]-3-ylmethyl}acetamide (**10b**)

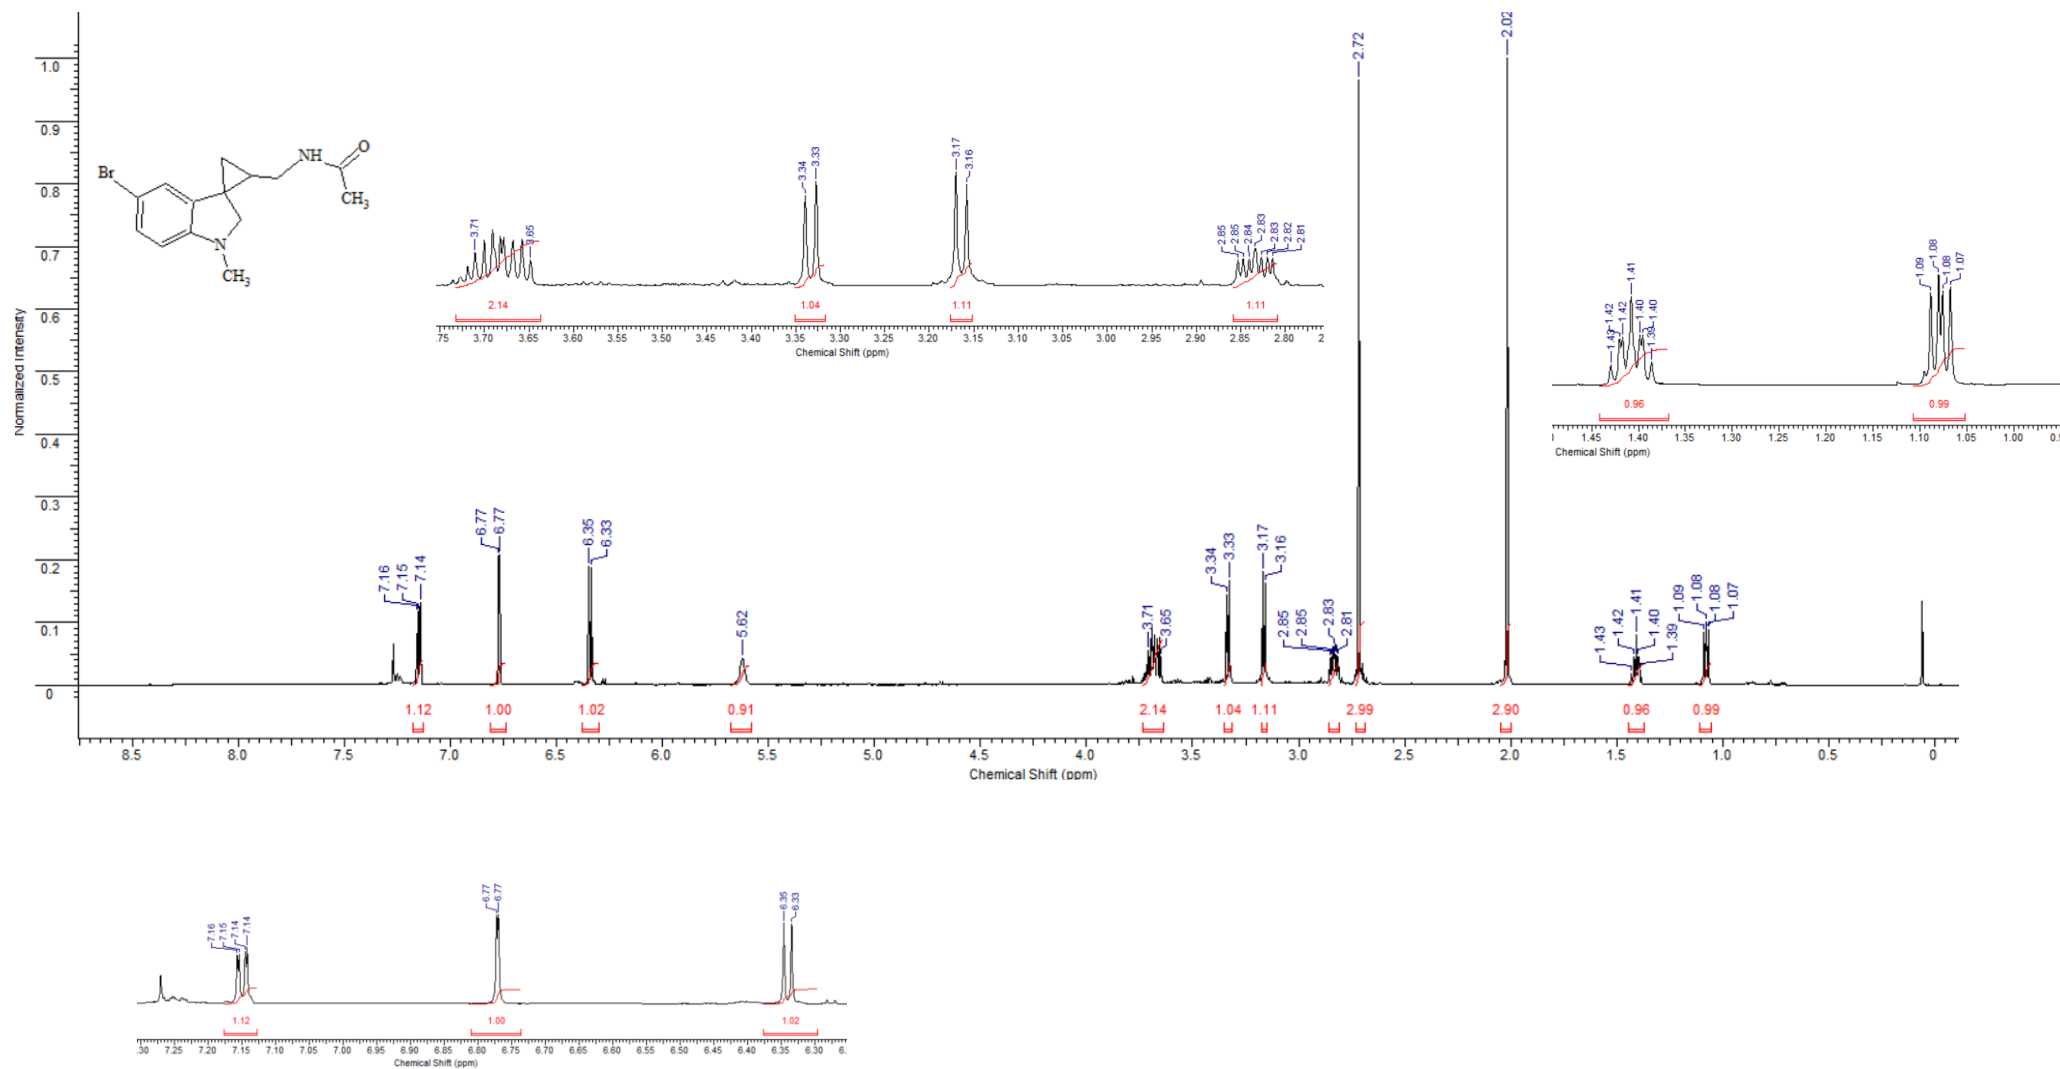

S60  $^{13}\text{C}$  NMR spectrum of *N*-{5'-Bromo-1'-methyl-1',2'-dihydrospiro[cyclopropan-1,3'-indol]-3-ylmethyl}acetamide (**10b**)

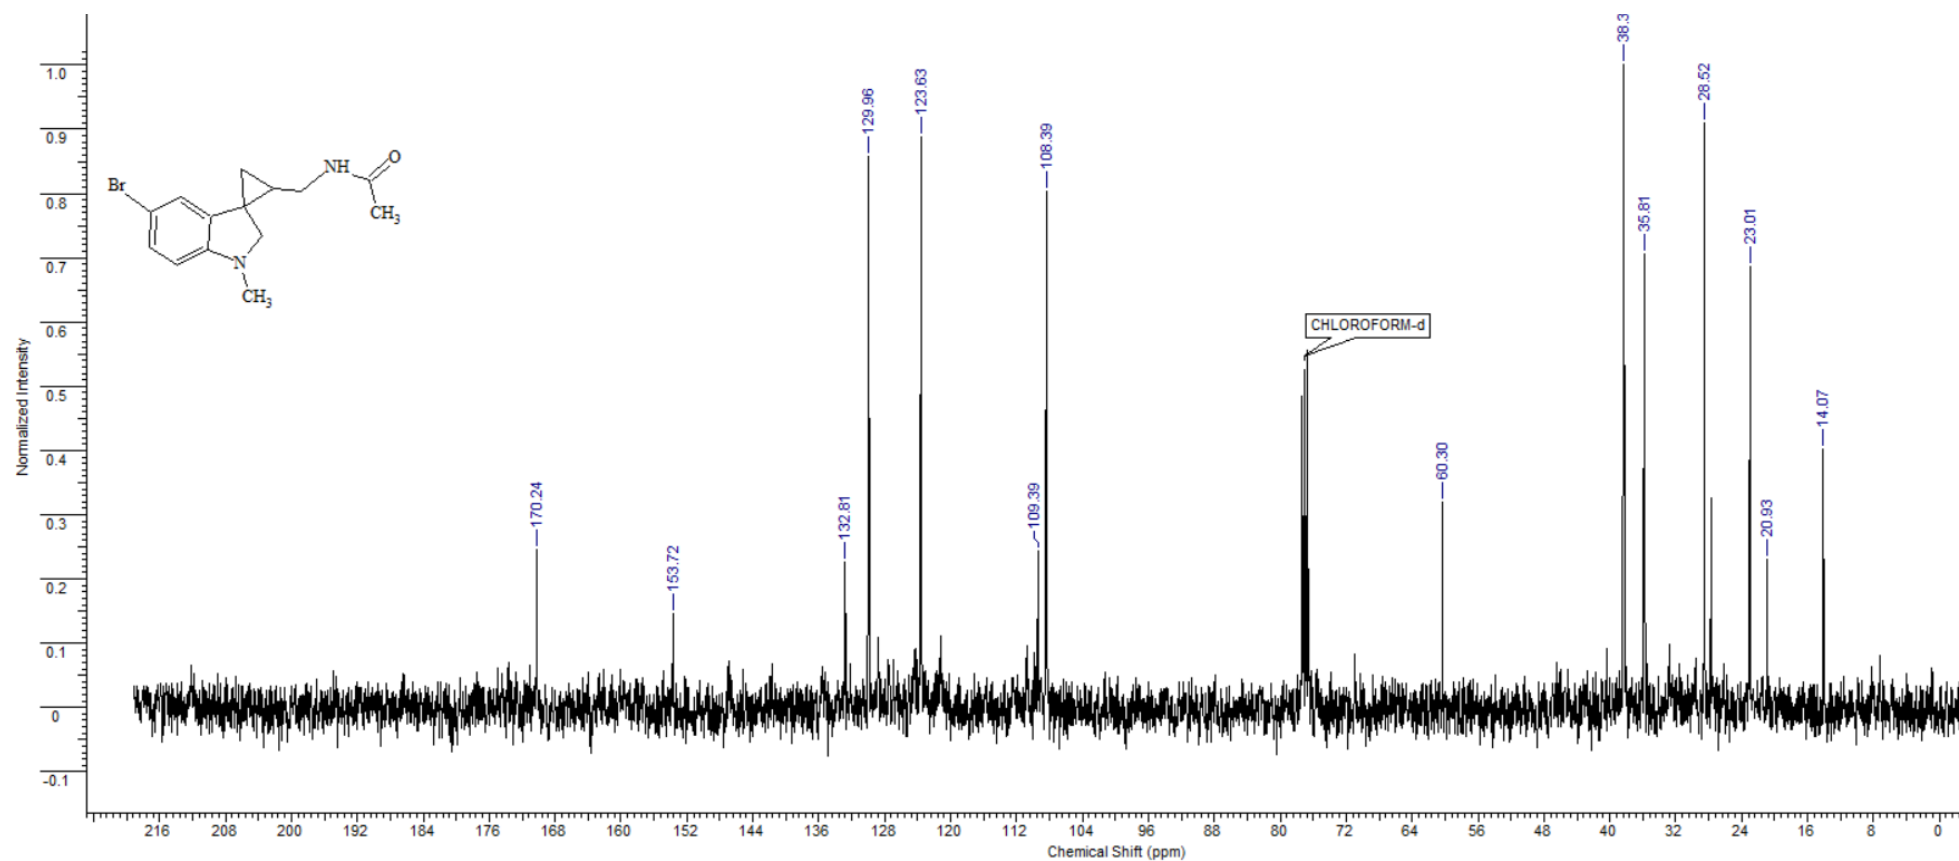

Supplement: s1 [file s1]
